# Overexpression of TICRR and PPIF confer poor prognosis in endometrial cancer identified by gene co-expression network analysis

Linlin Yang<sup>1,2,3</sup>, Yunxia Cui<sup>1,2,3</sup>, Xiao Sun<sup>1,2,3</sup>, Yudong Wang<sup>1,2,3</sup>

<sup>1</sup>Department of Gynecologic Oncology, The International Peace Maternity and Child Health Hospital, School of Medicine, Shanghai Jiao Tong University, Shanghai, China

<sup>2</sup>Shanghai Municipal Key Clinical Specialty, Shanghai, China

<sup>3</sup>Shanghai Key Laboratory of Embryo Original Disease, Shanghai, China

**Correspondence to:** Yudong Wang, Xiao Sun; **email:** [wangyudong@shsmu.edu.cn](mailto:wangyudong@shsmu.edu.cn), [sunxiao@shsmu.edu.cn](mailto:sunxiao@shsmu.edu.cn)

**Keywords:** bioinformatics analysis, *in vitro* experiment, WGCNA, endometrial carcinoma, prognosis

**Received:** July 9, 2020

**Accepted:** November 3, 2020

**Published:** January 20, 2021

**Copyright:** © 2021 Yang et al. This is an open access article distributed under the terms of the [Creative Commons Attribution License](https://creativecommons.org/licenses/by/3.0/) (CC BY 3.0), which permits unrestricted use, distribution, and reproduction in any medium, provided the original author and source are credited.

## ABSTRACT

The incidence of endometrial cancer (EC) is intensively increasing. However, due to the complexity and heterogeneity of EC, the molecular targeted therapy is still limited. The reliable and accurate biomarkers for tumor progression are urgently demanded. After normalizing the data from Gene Expression Omnibus (GEO) and The Cancer Genome Atlas (TCGA), we utilized limma and WGCNA packages to identify differentially expressed genes (DEGs). The copy number variations of candidate genes were investigated by cBioPortal. Enrichment pathways analysis was performed by ClueGO and CluePedia. The methylation status was explored by UALCAN. ROC curve and survival analysis were conducted by SPSS and Kaplan–Meier. Infiltration immune cells in microenvironment were analyzed by TISIDB. Gene Set Enrichment Analysis (GSEA) and Gene Set Variation Analysis (GSVA) were applied to explore potential biological pathways. Immunohistochemistry staining (IHC), cell proliferation, cell apoptosis, colony formation, migration, invasion and scratch-wound assays were performed to investigate the function of key genes *in vitro*. In this study, four expression profile datasets were integrated to identify candidate genes. Combined with WGCNA analysis, the top ten candidates were screened out, whose abnormal methylation patterns were extremely correlated with their expression level and they were associated with tumor grades and predicted poor survival. GSEA and GSVA demonstrated they were involved in DNA replication and cell cycle transition in EC. Gene silencing of TICRR and PPIF dramatically inhibited cell growth, migration and epithelial-mesenchymal transition (EMT) and enhanced progesterone sensitivity. Additionally, from DrugBank database, cyclosporine may be effective for PPIF targeted therapy. By integrative bioinformatics analysis and *in vitro* experiments, our study shed novel light on the molecular mechanisms of EC. TICRR and PPIF may promise to be potential therapeutic targets for endometrial cancer.

## INTRODUCTION

Since the morbidity and mortality of endometrial cancer (EC) is constantly increasing per year [1, 2], EC has become the fourth most common malignancy in the female reproductive system. There are around 170,000 diagnosed cases and 36,000 deaths of EC annually [3], which accounts for approximately 5.7%

of new cases and 3% of deaths in all types of tumors [4]. The 5-year disease-specific survival of patients diagnosed in the early stages is 74.2-90.8%. For women in progressive stage III or stage IV, it is 57.3-66.2% and 20.1-25.5% respectively [5], while for patients with recurrent or metastatic disease, it remains as low as 16% [6]. Although substantial efforts have been made to explore the mechanisms of

carcinogenesis [7–10], owing to the complexity and heterogeneity of EC, the etiology of EC still remains obscure and the progress in targeted or personalized therapy is limited. Therefore, the exploration of targeted molecules and explanation of tumor mechanisms are indispensable.

With the advances in bioinformatics technology, microarray and high-throughput sequencing platform provided new perspectives for cancer study [11]. In order to avoid differential gene research bias of small sample sizes in individual studies, this current research performed a comprehensive and systematic bioinformatics analysis of EC. Besides, weighted gene co-expression network analysis (WGCNA) as a novel and effective biology method [12], which illustrates gene expression data through constructing gene networks based on similarities in expression pattern among samples, was adopted to identify the most connected genes that were associated with clinical features [13]. After overlapping the genes in differential expression and co-expression network, the common genes were found. The Cancer Genome Atlas (TCGA) was used to analyze somatic mutation status of hub genes, through which we could find the distributions of mutation frequencies, types and contexts in EC [14]. The interaction between tumor and immune defense system plays a critical role in cancer progression and pharmacotherapy efficacy. To investigate associations between hub genes and immune factors, such as mature lymphocytes, immunomodulators and chemical chemokines, the web portal of TISIDB was applied [15]. MEXPRESS and UALCAN analysis were performed to explore epigenetic regulation of gene especially the methylation status in promoter region and their correlation with gene expression [16]. Gene Set Enrichment Analysis (GSEA) and Gene Set Variation Analysis (GSVA) were utilized to demonstrate underlying biological functions of hub genes [17].

In this study, we implemented an integrated bioinformatics analysis of EC using GSE17025, GSE63678 and GSE115810 and TCGA UCEC databases. In combination with WGCNA strategy, the most remarkable genes were identified. Then, the somatic mutation status, methylation patterns, gene expression profiles and survival analysis were performed by cBioPortal, UALCAN, Gene Expression Profiling Interactive Analysis (GEPIA), Human Pathology Atlas (HPA) and Kaplan-Meier method, respectively. Moreover, GSEA and GSVA analysis were applied to verify the most involved pathways of the real hub genes. Finally, two DEGs (TICRR and PPIF) were generated, which may become potential prognostic indicators and therapeutic targets for endometrial cancer.

## RESULTS

### Identification of robust DEGs between endometrial carcinoma and normal tissues

Three gene expression datasets about EC from the GEO database, including GSE17025, GSE63678 and GSE115810, and TCGA UCEC RNA-sequencing data were used to identify DEGs in EC (Table 1). After data preprocessing and standardization, the limma and DESeq2 R packages were utilized to screen out DEGs [18]. On the basis of the threshold of P value < 0.05 and  $|\log \text{fold change (FC)}| > 2$ , DEGs were obtained and differential results were shown in the volcano plots, respectively. The expression profiles of the top 100 DEGs were acquired from the four datasets and visualized by cluster heatmaps, as shown in Figure 1A–1D, respectively.

### Construction of weighted gene co-expression network and identification of the core modules

To detect the key modules most relevant to EC clinical traits, WGCNA was performed on the four datasets, respectively. The data of EC were acquired from TCGA database. After data standardization and preprocessing, the 10 000 most significant genes based on expression values of EC were applied to set up the weight co-expression network. After filtering out the aberrant samples, the soft threshold power value  $\beta$  was defined as four to build the adjacency matrix by the power function (scale free  $R^2 = 0.89$ ) (Figure 1E). The co-expression modules were performed by hierarchical clustering and dynamic branch cutting (Figure 1F). The dendrogram and heatmap of samples (Figure 1G) were utilized to screen out groups of relevant eigengenes. From the heatmap of module–trait correlations (Figure 2A), we explored that the brown and green-yellow modules were the most highly correlated with clinical features. Moreover, the scatterplots of gene significance (GS) vs module membership (MM) in the two selected modules were plotted respectively (Figure 2B). In addition, sample cluster of GSE17025 was performed to detect data quality in the microarray and to remove outlier samples. We set the soft threshold as three (Figure 1H) and twenty-two modules were identified (Figure 1I). Besides, we clustered eigengenes on the basis of their correlation and equivalent results were demonstrated by the heatmap (Figure 1J). The ME in the turquoise and red module illustrated a high correlation with tumor status, respectively (Figure 2C, 2D) illustrated the correlation between MM and GS in the two modules, respectively. Meanwhile, the cluster analysis images for GSE115810 and GSE63678 were shown in Supplementary Figures 1, 2, the black module in GSE115810 and the pink module in GSE63678

**Table 1. Details of the datasets.**

| Dataset   | sample      | normal | tumor | platform | reference           |
|-----------|-------------|--------|-------|----------|---------------------|
| GSE17025  | endometrium | 12     | 91    | GPL570   | Day et al.(2011)    |
| GSE63678  | endometrium | 5      | 7     | GPL571   | Pappa et al.(2015)  |
| GSE115810 | endometrium | 3      | 24    | GPL96    | Hermyt et al.(2019) |
| TCGA UCEC | endometrium | 35     | 333   | -        | -                   |

tended to be significantly correlated with tumor traits among other modules.

### Identification of hub genes

Venn diagram was performed to identify common genes among the four aforementioned datasets. As demonstrated in Figure 3A, 45 common DEGs were detected (Supplementary Table 1). The selected modules that correlated with tumor traits through co-expression network were also overlapped (Figure 3B and Supplementary Table 2). Subsequently, a total of sixteen key genes were screened out from both DEG network and co-expression network (Figure 3C and Supplementary Table 3). The genes were shown in Table 2. In order to explore whether the key genes showed somatic mutations in EC, we detected mutations in tumor-related genes and found PTEN (71.46%), PIK3CA (50.6%) and ARID1A (40.77%) were most frequently mutated genes (Figure 3D). Next, the biological function of the common genes and their co-expression genes was analyzed using ClueGO and CluePedia, showing enrichment in mitotic nuclear division, GTPase regulator activity and NADH regeneration pathway (Figure 3E). Then we conducted GO and KEGG analyses (Figure 3F), which indicated that genes were notably involved in mitotic nuclear division, carbon metabolism and TNF signaling pathway (Table 2). We analyzed the results in Metascape database (Figure 3G, 3H), showing similar enrichment in cell division, receptor metabolic process and positive regulation of GTPase activity, which were consistent with our findings.

### Real hub genes validation in the TCGA dataset

We adopted the top ten variant genes that had not been researched in EC for subsequent analysis. OncoPrint of CBioPortal was utilized to demonstrate the ten hub genes' alteration pattern in TCGA EC patients and the alteration frequency of each common gene was illustrated in Figure 4A, which was less than 8%. Then we applied GEPIA and UALCAN databases to explore the difference in expression level among tumor and normal tissues (Figure 4B). Results suggested that all these ten hub genes were abnormally differentially

expressed in the tissues of endometrial cancer. Furthermore, immunohistochemistry (IHC) staining extracted from Human Protein Atlas database (HPA) also demonstrated the differential protein expression level of core genes, as shown in Figure 4C, which were in accordance with the transcriptional level. Above results confirmed that the hub genes we identified were reliable.

### Methylation status, survival analysis and efficacy evaluation of hub genes

We explored the methylation status of core genes to clarify potential mechanisms of their aberrant expression in EC tissues (Figure 5A). Results showed that they were all aberrantly methylated, which were extremely correlated with their expression level. Next, overall survival data was analyzed based on the low or high expression of each gene, which showed statistically significant difference (Figure 5B). Furthermore, ROC curve assessment was carried out to detect the capacity of real core genes to predict overall survival of patients by using SPSS and AUC values of ten genes were greater than 0.6 (Figure 5C), showing that they could be utilized as effective indicators to monitor prognosis.

### Verification the expression and function of TICRR and PPIF genes through *in vitro* experiments

To evaluate the expression of differential genes at the cellular level, we performed qRT-PCR assays in both normal and endometrial cancer cells. Genes TICRR and PPIF were significantly overexpressed in cancer cells than in normal endometrial epithelial cells (EEC) compared with other genes, suggesting they may play a pivotal role in oncogenesis and were selected for the following research (Figure 6A). We then evaluated the expression patterns of TICRR and PPIF in a panel of endometrial cancer cell lines. Higher levels of TICRR and PPIF were observed in Ishikawa, HEC-1B and KLE cell lines compared to EEC cells (Figure 6B). These data indicated that TICRR and PPIF may be associated with endometrial cancer. Meanwhile, we knocked down the expression of TICRR and PPIF in the cancer cell lines by transfection of siTICRR and siPPIF

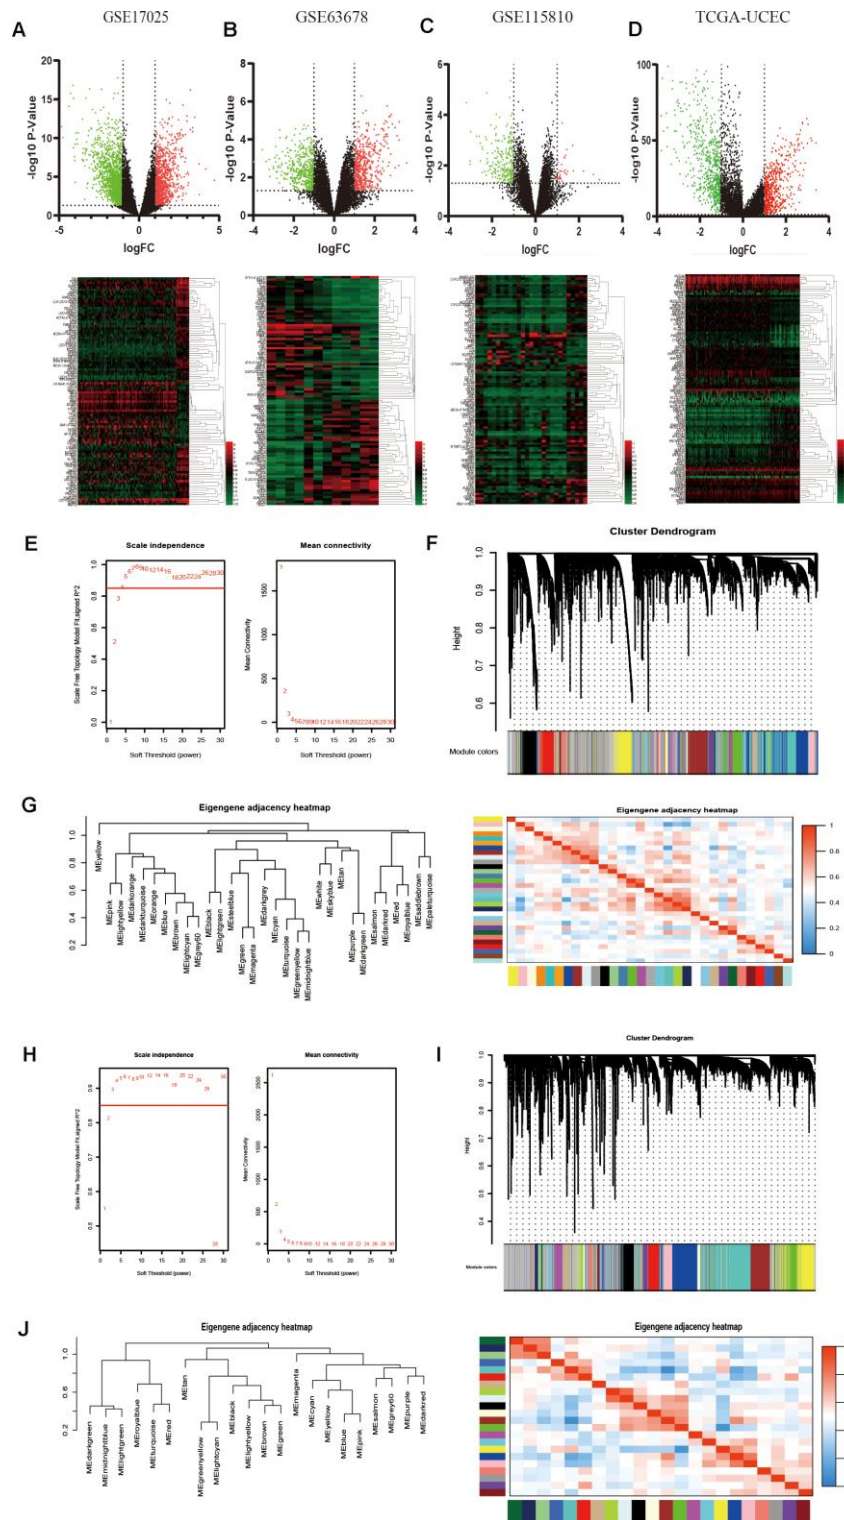

**Figure 1. Identification of DEGs among GEO and TCGA-UCEC datasets and construction of co-expression modules by WGCNA package.** (A–D) The volcano plots and heatmaps of DEGs in GSE17025, GSE63678, GSE115810 and TCGA-UCEC databases, respectively. In the heatmap, red indicates relative upregulation of gene expression; black indicates no significant change; green indicates downregulation of gene expression. (E) Analysis of the scale-free fit index and mean connectivity for various soft-thresholding powers for TCGA samples. (F) Dendrogram of differentially genes clustered based on a dissimilarity measure (1-TOM) for TCGA samples. (G) Dendrogram of consensus module eigengenes and heatmap of the adjacencies for TCGA. (H) Analysis of network topology for various soft-threshold powers for GSE17025 data. (I) Clustering dendrogram of genes in GSE17025 with dissimilarity based on topological overlap, together with assigned module colors. (J) Visualizing the gene network using a heatmap plot of GSE17025 data.

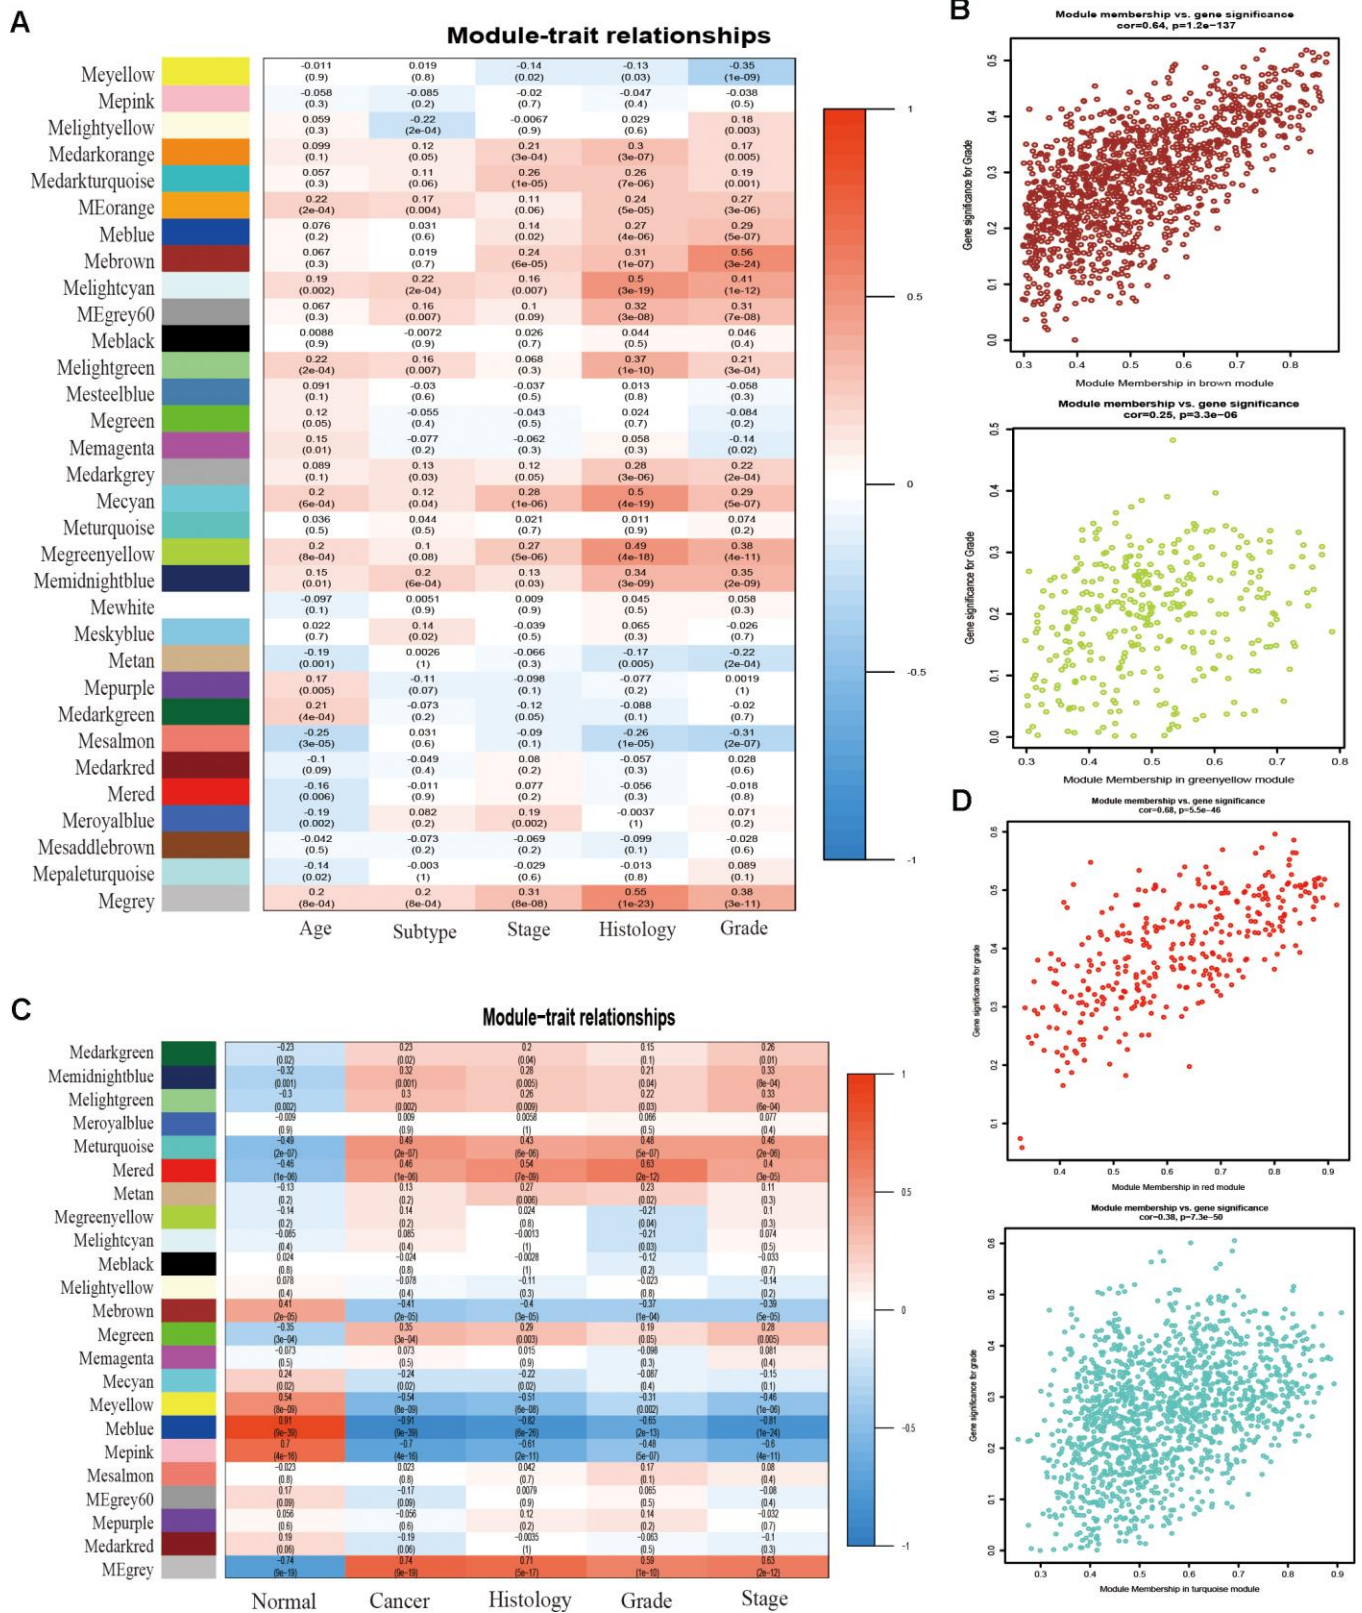

**Figure 2. Correlation between module eigengenes and clinical traits.** (A) Correlation between modules and traits of TCGA data. (B) Scatter plots of GS versus the MM in the brown and green-yellow modules of TCGA data. (C) Correlation between modules and traits of GSE17025 data. (D) Scatter plots of module eigengenes in turquoise and red modules of GSE17025.

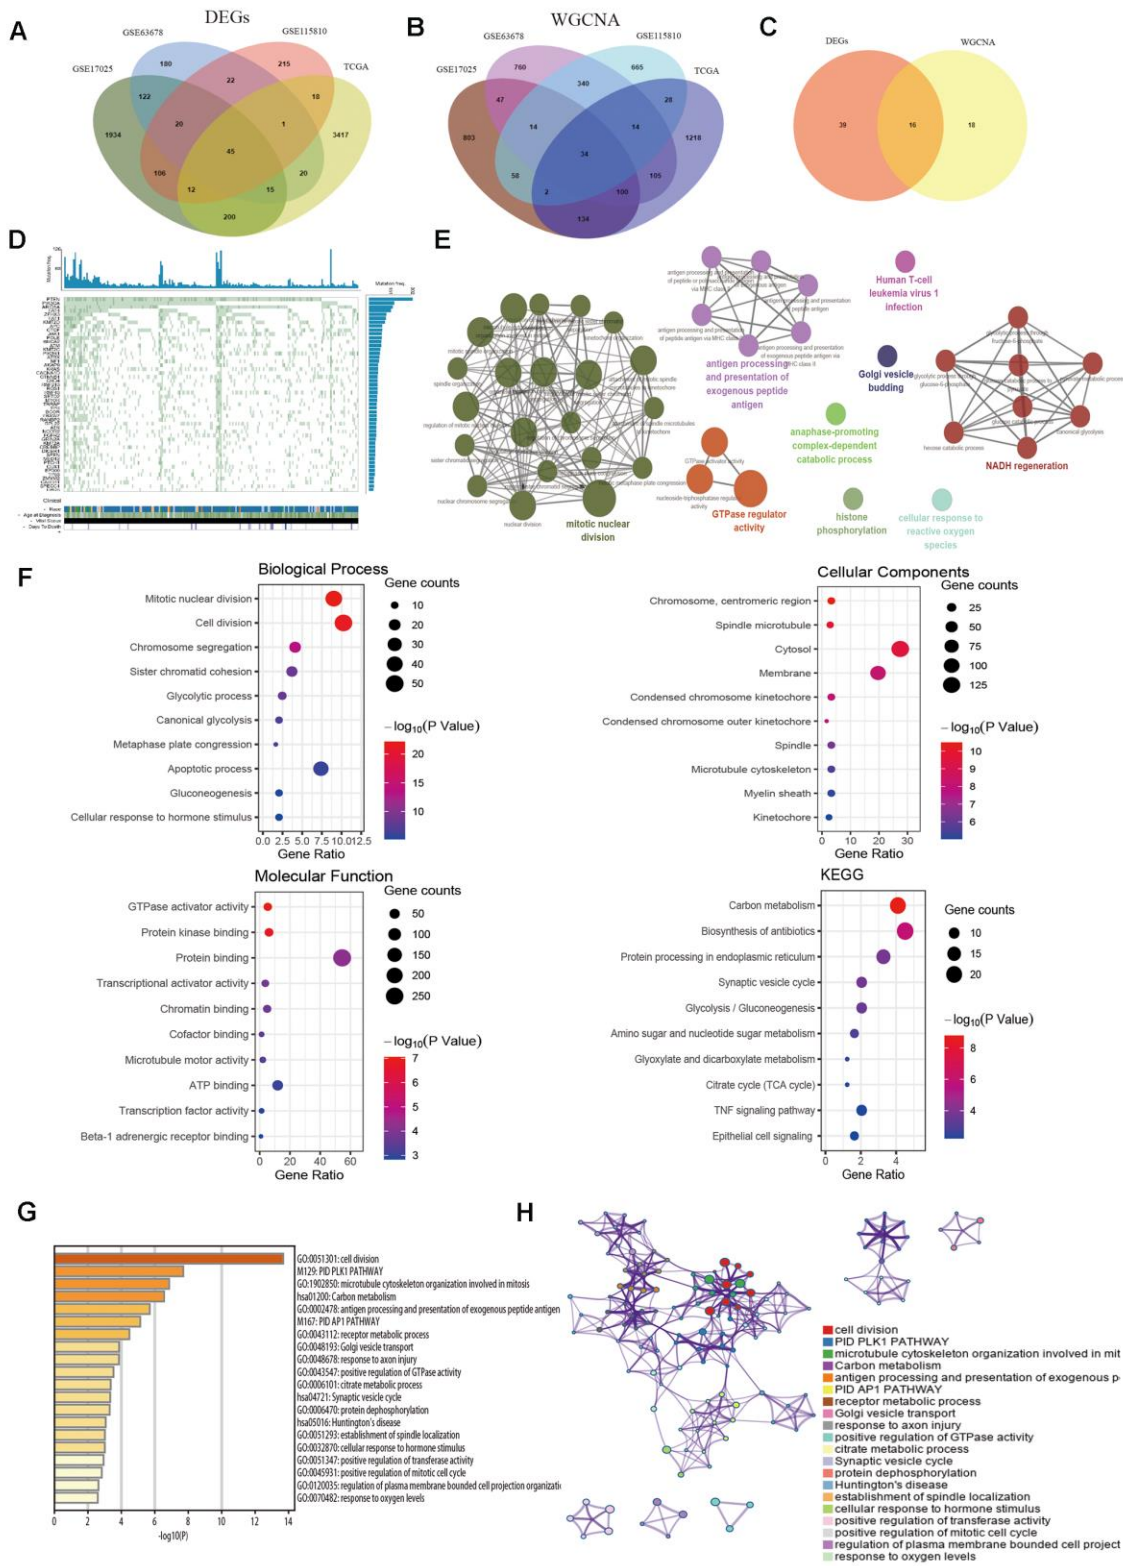

**Figure 3. Identification of common hub genes and functional enrichment analysis.** (A) Venn diagram shows the intersection genes of GSE17025, GSE63678, GSE115810 and TCGA-UCEC. (B) Essential genes were found among the selected modules through co-expression network. (C) The intersection common genes of essential genes and DEGs. (D) Top 50 somatic mutated genes in EC. (E) The functional annotation analysis of hub genes was performed by ClueGO and CluePedia. (F) Biological Process (BP) terms, Cellular Component (CC) terms, Molecular Function (MF) terms and KEGG analysis for genes. (G) Boxplot of enriched terms across input gene lists by Metascape, colored by P-values. (H) Network of enriched terms by Metascape.

**Table 2. List of sixteen hub genes identified by venn analysis.**

| Gene symbol | Description                                             |
|-------------|---------------------------------------------------------|
| UBE2C       | ubiquitin conjugating enzyme E2 C                       |
| SOWAHC      | sosondowah ankyrin repeat domain family member C        |
| CYR61       | cellular communication network factor 1                 |
| MYO15B      | myosin XVb                                              |
| ARHGAP10    | Rho GTPase activating protein 10                        |
| GNG11       | G protein subunit gamma 11                              |
| LYPLA2      | lysophospholipase 2                                     |
| PLS1        | plastin 1                                               |
| PPIF        | peptidylprolyl isomerase F                              |
| BIRC5       | baculoviral IAP repeat containing 5                     |
| PRRC2A      | proline rich coiled-coil 2A                             |
| TICRR       | TOPBP1 interacting checkpoint and replication regulator |
| MUC1        | mucin 1, cell surface associated                        |
| VAMP8       | vesicle associated membrane protein 8                   |
| WT1         | WT1 transcription factor                                |
| CXCL12      | C-X-C motif chemokine ligand 12                         |

respectively, siTICRR-1 and siPPIF-2 with high transfection efficiency were used for subsequent experiments (Figure 6C, 6D). Silencing of TICRR and PPIF led to enhance the expression of epithelial marker E-cadherin and decrease the mesenchymal marker N-cadherin and metastasis associated genes MMP9 as well as proliferation-related marker CCND1, suggesting their involvement in the progression of endometrial cancer (Figure 6E). Medroxyprogesterone acetate (MPA) as a conservative therapy is commonly applied to the early stage of endometrial carcinoma [19]. The knockdown of TICRR resulted in a potent decrease of cell growth and clone formation and enhanced the inhibitory effect of MPA (Figure 6F) and the downregulated PPIF yielded the similar results (Figure 6G). Meanwhile, we found that TICRR and PPIF positive staining were present at a higher level in tissues with endometrial cancer than in tissues of paracancer endometrium (Figure 7A). Next, siRNA knockdown of TICRR and PPIF respectively increased the percentage of apoptotic cells in Ishikawa cells (Figure 7B). Further, silencing of TICRR and PPIF respectively in Hec-1B cells significantly inhibited cell migration and invasion compared to control cells and elevated the effectiveness of progesterone (Figure 7C, 7D). The effect of TICRR on cell migratory capacity was also analyzed by wound-healing assay, revealing an apparent suppression of the migratory ability of Hec-1B cells transfected with TICRR siRNA in combination with MPA (Figure 7E). Moreover, the wound closure was reduced obviously in siPPIF-treated cells as well, making progesterone treatment more effective (Figure 7F).

#### Association of hub genes expression with clinicopathologic parameters and immune infiltration

Further, we verified the expression of core genes in different pathological status. As illustrated in Figure 8A, mRNA expression of TICRR in EC samples were dramatically correlated with clinical stages and pathological grades. Similarly, upregulated expression of PPIF was notably correlated with the advanced pathological parameters in TCGA cohort (Figure 8C). Infiltrating immune cells were main components of tumor microenvironment and may play a vital role in tumor progression. Through the method of Microenvironment Cell Populations-counter [20], we explored the association between TICRR and immune cell populations. Results showed that TICRR had a correlation with activated CD4 T cell (Figure 8B), while there was weak correlation between PPIF and CD56dim natural killer cell in UCEC (Figure 8D). In addition, survival information and ROC curves of the two genes were also obtained using TCGA data, suggesting that high TICRR and PPIF expression tended towards poor prognosis of EC patients (Figure 8E, 8F), which were consistent with our former findings.

#### GSEA and GSVA analysis of core genes

To thoroughly investigate the potential biological functions of TICRR and PPIF in EC, GSEA and GSVA were applied to perform pathway analysis. Results of GSEA showed that the most involved pathways of TICRR were vesicle mediated transport, gene

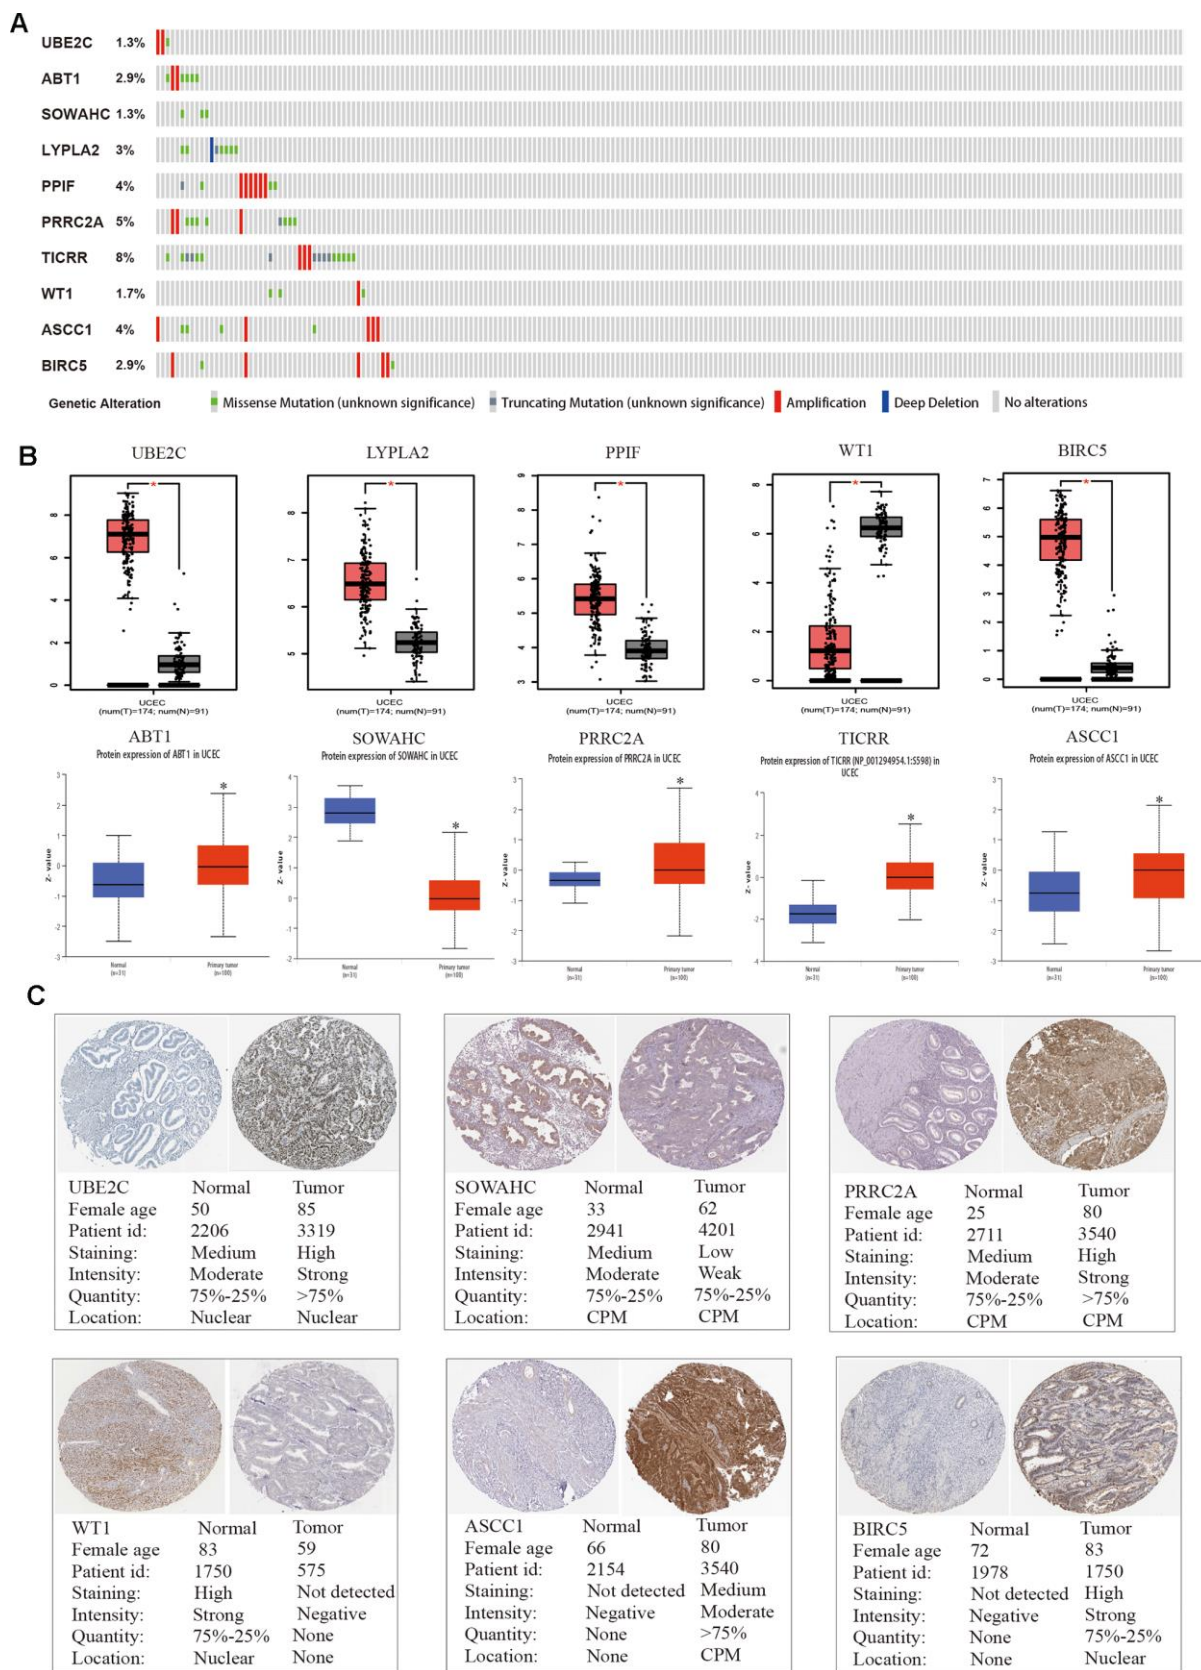

**Figure 4. Genetic alterations and protein expression of hub genes in TCGA. (A)** A visual summary on a query of genetic alteration of 10 hub genes in TCGA dataset. **(B)** Transcriptional level of each gene was identified in both GEPIA and UALCAN database. \* $p < 0.05$  compared with normal endometrial tissues. **(C)** Validation of hub genes by The Human Protein Atlas database.



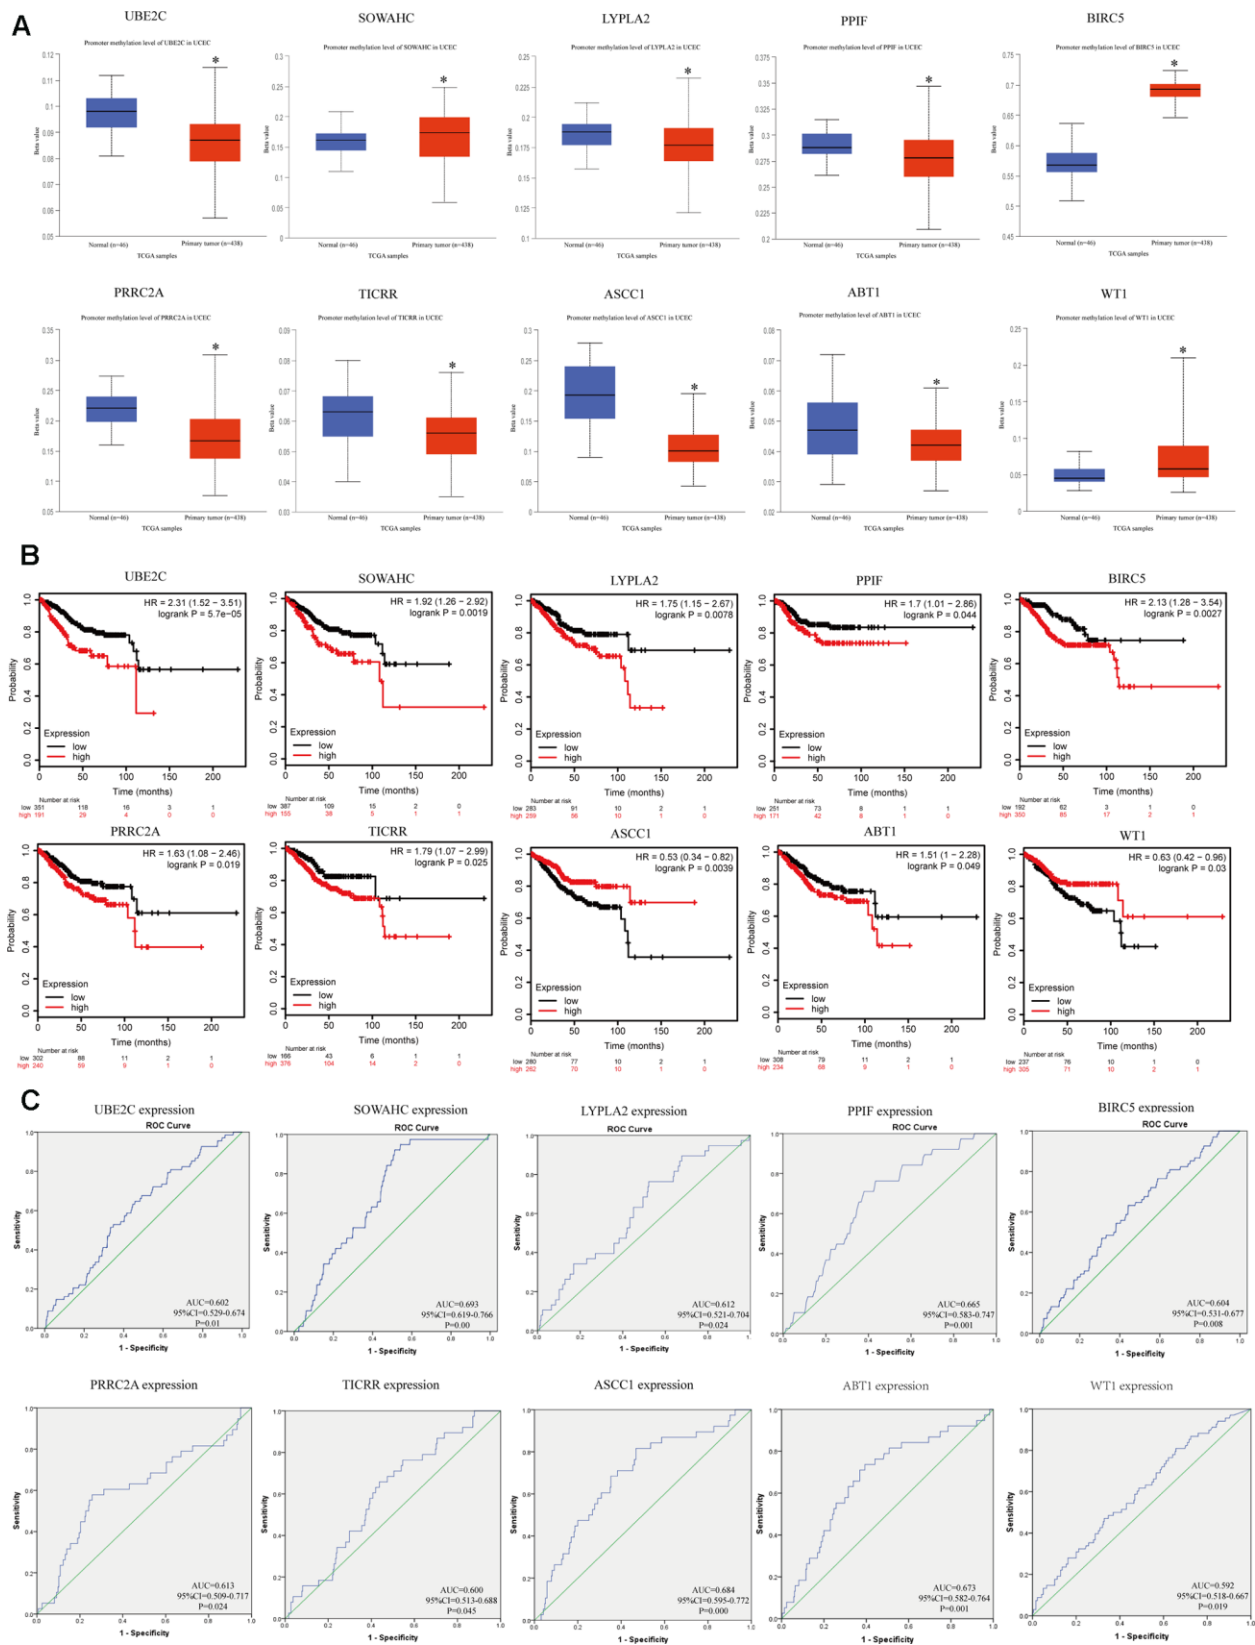

**Figure 5. Methylation status and survival analysis of the hub genes. (A)** Gene methylation status of ten hub genes were validated in TCGA database. \* $p < 0.05$  compared with normal endometrial tissues. **(B)** Univariate survival analysis of the hub genes using the Kaplan-Meier curve. **(C)** Receiver operating characteristic (ROC) curve analysis and area under the curve (AUC) statistics was applied to evaluate the capacity of real hub genes to predict overall survival of patients.

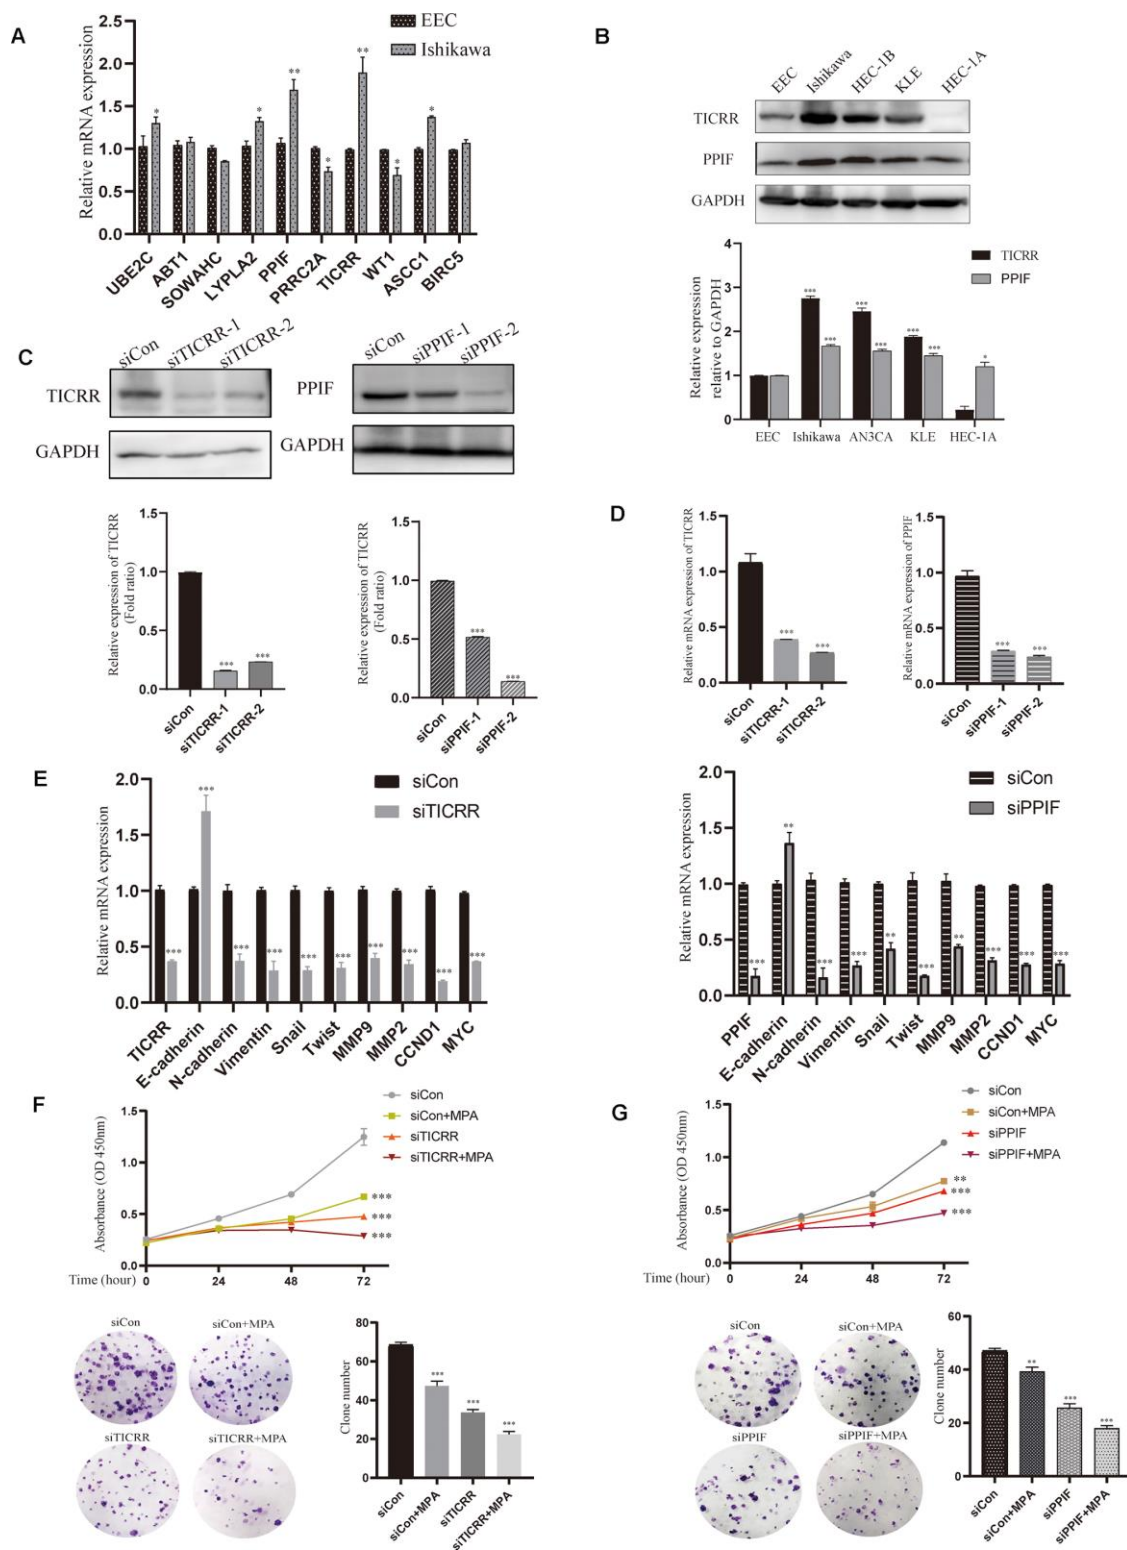

**Figure 6. Validation of hub genes by cell experiments *in vitro*.** (A) Identification of differentially expressed genes by qPCR assay in both normal endometrial epithelial cells and endometrial cancer cell lines. (B) Western blot assay showing the expression of TICRR and PPIF in EC cell lines and normal endometrial epithelial cells. (C) The effect of different siRNA on TICRR and PPIF gene silence by western blotting respectively. (D) TICRR and PPIF expression were examined by RT-PCR after transfected with siRNA for 24h. (E) Relevant molecular targets were verified by qPCR after transfection of siTICRR and siPPIF for 24hrs respectively. (F) Cell growth and clone formation of siTICRR transfected cells with or without MPA. (G) Cell growth and clone formation of siPPIF transfected cells with or without MPA. Data were shown as mean  $\pm$  SD; \* $p < 0.05$ ; \*\* $p < 0.01$ ; \*\*\* $p < 0.001$ .

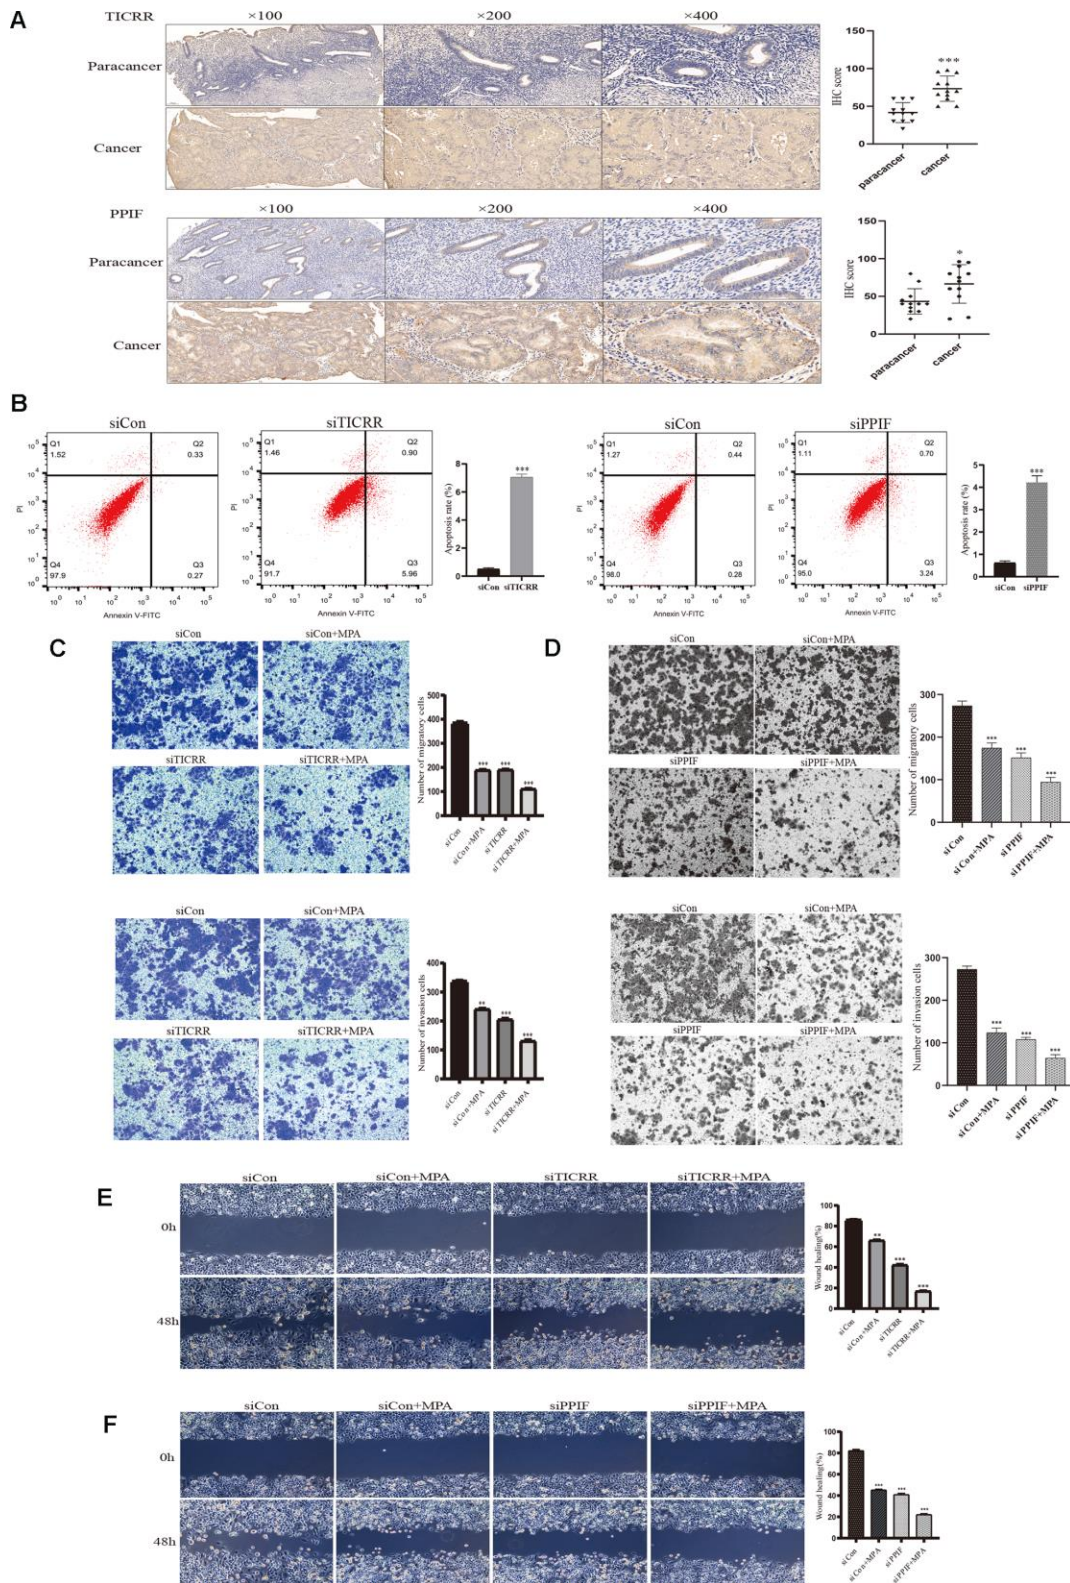

**Figure 7. IHC staining and functional verification of TICRR and PPIF genes.** (A), The expression of TICRR and PPIF in endometrial cancer and paracancer samples were assessed using IHC staining and the results of statistical analysis. (B) Analysis of apoptosis by Flow cytometry after transfection with siTICRR and siPPIF respectively. (C) Hec-1B-siTICRR cells were subjected to migration and invasion assays in the presence or absence of MPA. (D) Migration and invasion ability of siPPIF transfected cells in the presence or absence of MPA. (E) Wound-healing assays for Hec-1B-siTICRR cells. (F) Wound-healing assays for Hec-1B-siPPIF cells. Data were shown as mean  $\pm$  SD; \* $p < 0.05$ ; \*\* $p < 0.01$ ; \*\*\* $p < 0.001$ .

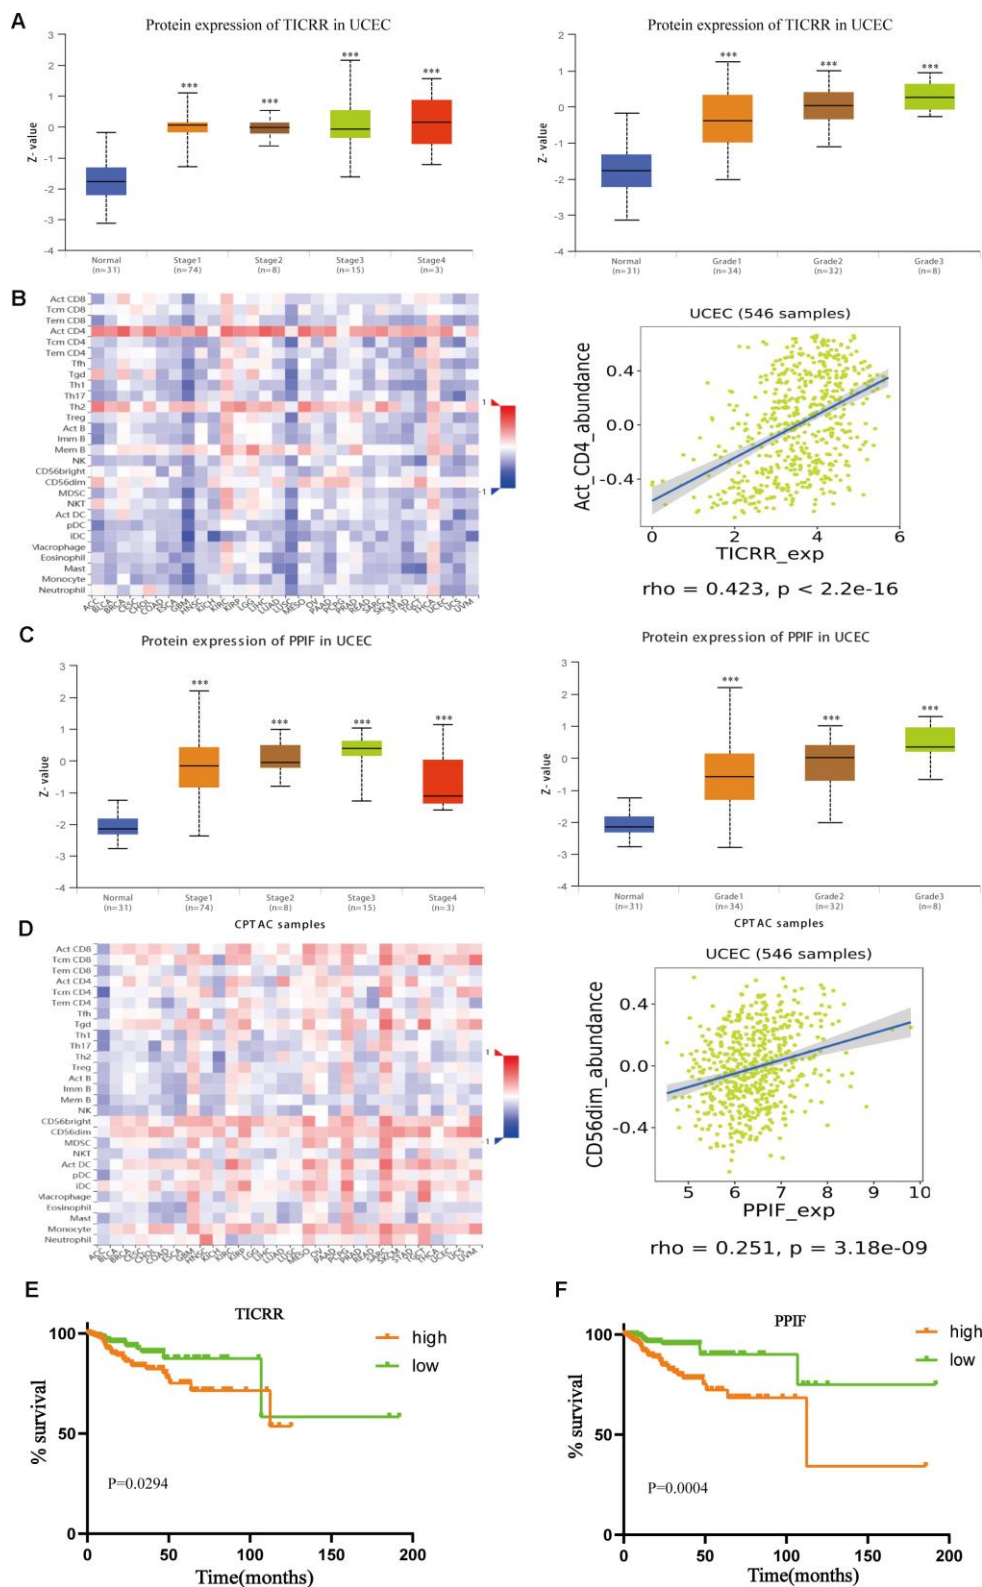

**Figure 8. Further exploration of the expression of TICRR and PPIF.** (A), Transcriptional expression of TICRR was significantly correlated with clinical stages and pathological grades of EC. \*\*\* $p < 0.001$  compared with normal tissues. (B) Analysis of the correlation between the expression of TICRR and infiltrating immune cells (C), Correlation between PPIF and clinical stages and grades, respectively. \*\*\* $p < 0.001$  compared with normal tissues. (D) Correlation between PPIF and immune cell populations. (E) Prognostic value of TICRR calculated by Kaplan-Meier analysis. (F) Overall survival analyzed using the Kaplan-Meier method with log-rank testing according to PPIF expression.

expression transcription, RHO GTPases signaling, cell cycle checkpoints and DNA repair pathway (Figure 9A). The top 50 significant genes were acquired by GSEA and shown in a heat map (Figure 9B). Meanwhile, GSEA enrichment analysis of PPIF indicated that cell division, ATPase activity, cadherin binding, kinase binding and ubiquitin ligase complex were the most significant pathways (Figure 9C) and the heat map of transcriptional expression profiles of 50 significant genes was shown in Figure 9D. Furthermore, GSVA analysis of TICRR confirmed that E2F mediated regulation of DNA replication, RHO GTPases activity and mitotic G1/S phase pathway were remarkably statistically significant in the high-expression groups of TICRR (Figure 9E) and MAPK3/ERK1 activation and regulation of PLK1 at G2/M transition pathway were activated in high-expression groups of PPIF (Figure 9F), suggesting their involvement in the cell cycle transition and proliferative processes in progression of endometrial cancer. In addition, DrugBank database was used to explore drugs targeting hub genes (Supplementary Figure 3). Results showed that cyclosporine and triglyme were small molecule drugs targeting PPIF, which provided support for drug selection of PPIF targeted therapy.

## DISCUSSION

Endometrial carcinoma is a common malignancy caused by abnormal glandular hyperplasia and accompanied by aberrant genetic and protein expression [21]. The global death rate of EC has continued to increase due to the lack of precise molecular targets. Though the high-throughput platforms provided promising targets in medical oncology, most previous studies only targeted individual database leading to poor clinical application and differential research bias that lacked biological effects. Our present study integrated RNA expression data from multiple datasets in combination with weighted gene co-expression network analysis to screen out biomarkers, which would provide more reliable and accurate clinical biomarkers for prognostic prediction and molecular therapy of EC.

In this study, unlike a single cohort study, four datasets including GSE17025, GSE63678 and GSE115810 and TCGA UCEC were analyzed systematically for the first time. Liu et al. [22] have just analyzed the dataset GSE17025 and demonstrated that eleven genes were associated with progression and prognosis of endometrial cancer (EC). Although our research is consistent in methodology, we have included as many databases as possible for comprehensive research. Moreover, we screened out the two highly upregulated genes and conducted a series of *in vitro* experiments for functional verification in endometrial cancer. Huo et al.

[23] explored the microarray-based dataset GSE72708 by WGCNA and identified six hub genes related to the prognosis of endometrial cancer especially by AKT1 regulation. They just focused on investigating the potential mechanisms of AKT1 in EC, which was complementary to our research results.

After screening DEGs in all datasets, 45 DEGs were obtained. Meanwhile, we applied WGCNA to explore the key modules and core genes correlated with clinical traits of EC by R packages and selected modules that were most definitely associated with the EC disease status. Then after overlapping with DEGs, the most central and connected sixteen hub genes were identified. Next we investigated somatic mutations and copy-number alterations of the top ten genes based on TCGA data, showing that mutation frequency of hub genes were lower than 8%. Furthermore, hub gene-related pathways were analyzed by ClueGO and CluePedia [24], which showed enrichment in mitotic nuclear division, GTPase regulator activity and NADH regeneration pathway, consistent with the results of DAVID and Metascape.

Subsequently, we verified the protein expression of hub genes by GEPIA, UALCAN and HPA databases [25], and then explored their methylation status, which were related with the expression of the genes. Kaplan Meier plotter was utilized to demonstrate survival analysis and ROC curves were used to assess the sensitivity and specificity of the survival prediction based on gene expression, indicating that they could serve as biomarkers to predict patients' survival.

Among these core genes, we chose two rarely reported ones which were also dramatically upregulated in EC cells, namely TICRR and PPIF for further studies. Through a series of *in vitro* experiments, we found that silencing TICRR or PPIF resulted in a significant suppression of cell proliferation and migration and elevated the effect of progesterone, suggesting their critical role in the progression of endometrial carcinoma.

To further identify their correlations with infiltrating immune cells, we explored in TISIDB dataset and found that TICRR was associated with activated CD4 T cell and PPIF was correlated with CD56dim natural killer cell, implying that immunocytes may play an essential role in tumor microenvironment. Once the underlying immune-related mechanisms were clarified by experimental method, TICRR and PPIF may be useful for novel immunotherapy. Based on previous studies, TICRR, a crucial checkpoint and replication modulator [26], contributed to the occurrence of tumor through promoting DNA replication and cyclin-dependent kinase regulated the length of S phase by TICRR/TRESLIN

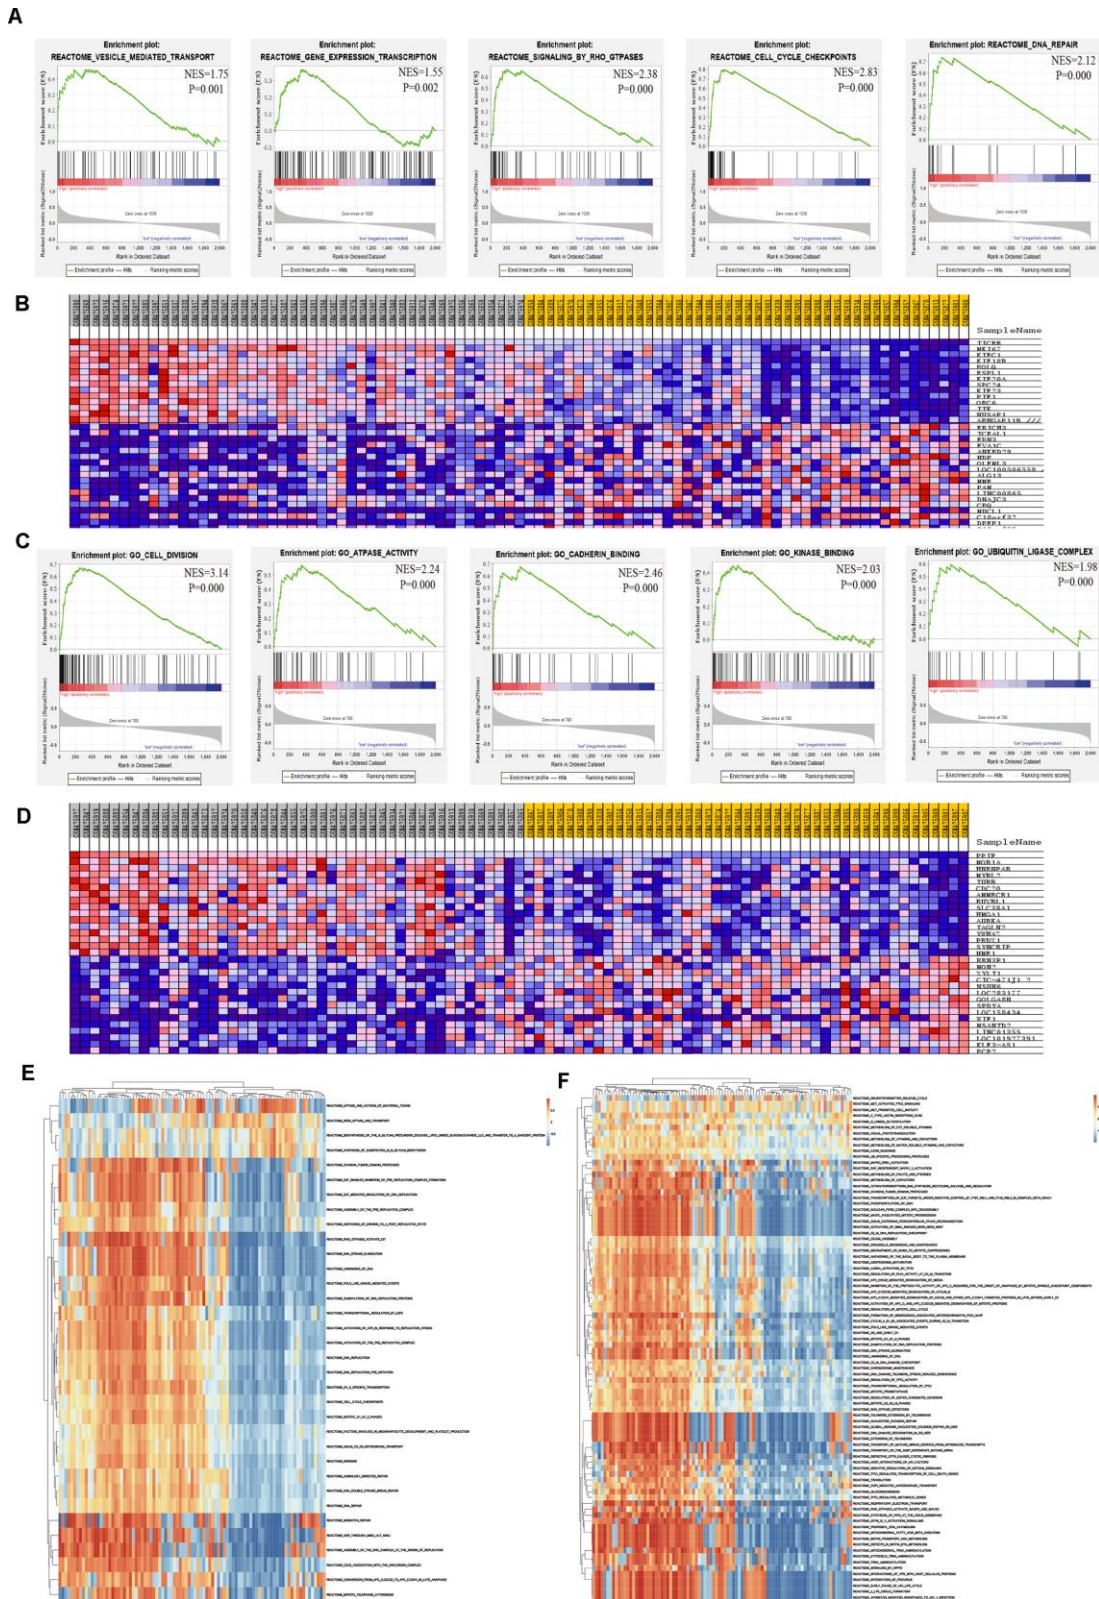

**Figure 9. Significant TICRR and PPIF-related genes and pathways in EC obtained by GSEA and GSVA. (A)** The most involved pathways in high-expression group of TICRR obtained by GSEA analysis. **(B)** Transcriptional expression profiles of the significant genes were shown in a heat map. **(C)** The most common functional gene sets in high-expression group of PPIF by GSEA. **(D)** Transcriptional expression profiles of the significant genes related with PPIF were shown in a heat map. **(E, F)** GSVA-derived clustering heatmaps of differential pathways for TICRR and PPIF, respectively.

phosphorylation in tumor [27], which were consistent with our GSEA and GSVA analysis but had not been validated in related study of endometrial cancer. Additionally, PPIF was reported to be involved in mitochondrial permeability transition regulated necrosis and necroptosis [28, 29], while the correlation between PPIF and mitochondrial ROS production in the development of endometrial carcinoma had not been researched. Besides, we searched DrugBank database to find drugs that targeted oncogenes, showing that cyclosporine and triglyme may be of great value to suppress tumor growth by inhibiting the expression of PPIF, which had not been verified in both experimental and clinical study of endometrial carcinoma.

In conclusion, by combining four databases, WGCNA and multiple bioinformatics methods and *in vitro* experiments, we explored significant gene modules and identified several robust DEGs in EC. Two hub genes (TICRR and PPIF) were robustly overexpressed in EC tissues and the expression profile were closely associated with promoter hypomethylation. GSEA and GSVA further demonstrated that the core genes were highly involved in the development of EC. Further research needs to be implemented to thoroughly elucidate their underlying contribution to the pathogenesis of endometrial cancer and to verify their efficiency as potential prognostic markers and therapeutic targets in endometrial cancer.

## MATERIALS AND METHODS

### Standardization and identification of DEGs

Normalized data of GSE17025, GSE63678 and GSE115810 were obtained from Gene Expression Omnibus (GEO, <http://www.ncbi.nlm.nih.gov/geo/>) and annotated according to the Affymetrix Human Genome U133A 2.0 Array platform. Pre-processing procedures included RMA background correction, and the “affy” R language package was adopted to complete log<sub>2</sub> transformation, quantile normalization and median polish algorithm summarization. Based on the probe annotation information, we mapped the probes to gene symbols. Probes matched with multiple genes were removed and when multiple probes corresponded to one specific gene, the average expression value was considered its final expression. Then, the gene expression profiles were utilized quantile normalization. The TCGA UCEC data was downloaded from TCGA database (<https://portal.gdc.cancer.gov/>), including 333 endometrial carcinomas and 35 normal tissues. After preprocessing and standardization of data, Limma and DESeq2 R packages were utilized to explore differentially expressed genes (DEGs)

[18, 30]. The value of  $|\log_2FC|$  (fold change)  $>2.00$  and P value  $<0.05$  were considered as the cutoff criteria.

### Weighted gene co-expression network construction and identification of modules

We adopted the top 50% most variant genes in each dataset to construct the co-expression network using WGCNA package [31], which was applied to explore clinical traits-related modules and core genes among them. To ensure the reliability of network construction, outlier samples which were defined as connectivity less than -2.5 were removed [32]. Based on the standard scale-free networks, the appropriate soft threshold power was selected and adjacencies were calculated by a power function (scale free  $R^2 = 0.85$ ). Then we transformed the adjacency into topological overlap matrix (TOM), and dissimilarity TOM ((1-TOM)) was obtained. Genes with high absolute correlation were divided into gene modules with the dynamic tree cut method by the hierarchical clustering genes using 1-TOM as the distance measure and a deepSplit value of two and a minimum size cutoff of 30 for the generated dendrogram. Highly similar modules were merged with a height cut-off of 0.25. Then we constructed module-trait relationships. The module eigengenes (MEs), the main component of the gene expression profile, represented the entire characteristics of module genes. The correlations between ME and clinical traits were calculated using the Pearson's correlation analysis [33]. For the intramodular analysis, gene significance (GS) was the absolute value to reflect the relationship between certain expression profile and each trait and the module membership (MM) was utilized to describe the correlation between each ME and gene expression profile. Next, the module membership (MM) and the absolute value of gene significance (GS) were also measured to screen out hub genes. Those with gene significance (GS)  $> 0.3$  and module membership (MM)  $> 0.8$  were identified as hub genes [34].

### Function enrichment analyses of DEGs

To obtain more comprehensive biological information of DEGs, we utilized ClueGO and CluePedia, the plugin of Cytoscape [35, 36], which can visualize the biological features for genes in a functionally grouped network. Meanwhile, The Database for Annotation, Visualization and Integrated Discovery (DAVID) [37] and Metascape (<http://metascape.org/>) which offers a biologist-oriented resource for the analysis of systems-level databases [38] were used to verify enriched biological themes pathways.  $P < 0.05$  was defined as the threshold criterion.

## **Methylation and gene expression analyses of candidate genes**

The somatic mutations and copy number variation of hub genes were explored in TCGA database by cBioPortal [39], which enables us to interactively investigate genetic alterations across samples and genes. Then Gene Expression Profiling Analysis (GEPIA, <http://gepia.cancer-pku.cn/>) was used to demonstrate the gene expression profiles from TCGA database. MEXPRESS and UALCAN analysis was performed to detect DNA methylation status [16]. The immunohistochemistry (IHC) data of common genes was searched in Human protein atlas (HPA) project which contains detailed information of samples [40].

## **Survival analysis of hub genes**

We performed survival analysis of genes by log-rank tests and Kaplan–Meier plotter (<http://kmplot.com/analysis/>) to explore differences in survival between different groups [41]. Besides, in order to evaluate hub genes' predictive values, we drew receiver operating characteristic (ROC) curves and measured area under the ROC curve (AUC) and 95% confidence intervals (CI) with SPSS software [42].

## **Correlation between gene expression and tumor-infiltrating immune cells**

To explore the association between the expression of identified hub genes and infiltrating immune cells, such as lymphocytes, immunomodulators and chemokines, we utilized the online tool TISIDB (<http://cis.hku.hk/TISIDB/index.php>) [43], which integrates multiple heterogeneous data types for each gene based on TCGA database.

## **Data processing of gene set enrichment analysis (GSEA) and gene set variation analysis (GSVA)**

We separated endometrial cancer cases from TCGA UCEC data into high-risk and low-risk groups by using the optimal cut-off values of selected hub gene. To identify potential biological pathways of the hub genes, GSEA software 4.0.3 (<https://software.broadinstitute.org/gsea/index.jsp>) was implemented in this study [44]. Similarly, the “GSVA” package in R language software 3.6.3 was utilized to explore the pathways most associated with core genes [45]. The gene sets “c2.cp.v7.2.symbols.gmt” and “c5.go.v7.2.symbols.gmt” that were downloaded from the Molecular Signature Database (MSigDB, <http://software.broadinstitute.org/gsea/msigdb/index.jsp>) were regarded as the reference gene set. Terms with FDR less than 0.25 and P value less than 0.01 were regarded as statistically significant pathways.

## **Cell lines and transient transfection**

The human endometrial epithelial cells (EEC) were purchased from American Type Culture Collection (ATCC, VA, USA) and were cultured in Epithelial Cell Medium (MingZhoubioCO Ltd). The human endometrial cancer cell lines (Ishikawa and HEC-1-B) were conserved in our team and were cultured in DMEM/F12 medium with 10% fetal bovine serum (FBS, Gibco). Cells were transfected using Lipofectamine 3000 (Invitrogen, NY, USA) according to the manufacturer's protocol. The siRNAs for TICRR and PPIF were designed by GenePharma (Shanghai, China) and the sequences were listed in Table 3.

## **Real-time PCR analysis**

Cells were seeded into 6-well plates. After the experimental treatment, total RNA was extracted with Trizol reagent and was reverse transcribed into cDNA. Then Real time PCR was performed using SYBR Premix (Takara, China). Primers were listed in Table 4.

## **Western blotting (WB) assay**

Total protein was extracted using radio-immunoprecipitation assay buffer (Beyotime, China) with inhibitor cocktail, and the concentrations were quantified by bicinchoninic acid assay kit (Yeasen, China). Western blotting was done according to standard protocols. Antibodies against TICRR (1:1000, NBP2-41283), PPIF (1:1000, 18466-1-AP),  $\beta$ -tubulin (1:5000, 30303ES10), GAPDH (1:5000, 30203ES10) were used as primary antibodies. The immunoblot bands intensity were quantified with ImageJ software (NIH, MD, USA).

## **Immunohistochemical (IHC) staining**

Paraffin sections of twelve pairs of endometrial adenocarcinoma (EC) and the paracancer tissue from the same patient were obtained from the tissue bank at the International Peace Maternity and Child Health Hospital. This study was in accordance with the tenets of the Helsinki Declaration. Immunohistochemical staining was performed as previously described [7]. Primary antibodies used in IHC assay included TICRR (NBP2-41283, Novus), PPIF (18466-1-AP, Proteintech) and a rabbit immunoglobulin G was utilized as a negative control. All sections were dual scored by two experienced pathologists who were blinded to sample information based on the combination of the intensity score and the percentage score.



**Table 3. The sequences for siRNAs.**

| Gene  |           | Sequences (5'-3') |                              |
|-------|-----------|-------------------|------------------------------|
| TICRR | siTICRR-1 | Sense:            | 5'-CCAACUGAUGCCACUUUAATT-3'  |
|       |           | Antisense:        | 5'-UUAAGUGGCAUCAGUUGGTT-3'   |
|       | siTICRR-2 | Sense:            | 5'-CCGAGACUCCAGUGCAUAATT-3'  |
|       |           | Antisense:        | 5'-UUAUGCACUGGAGUCUCGGTT-3'  |
| PPIF  | siPPIF-1  | Sense:            | 5'-GGGUGAUCCCUUCCUUAUATT-3'  |
|       |           | Antisense:        | 5'-AUGAAGGAAGGGAUCACCCTT-3'  |
|       | siPPIF-2  | Sense:            | 5'-GCUAAUGCUGGUCCUAACATT-3'  |
|       |           | Antisense:        | 5'-UGUUAGGACCAGCAUUAAGCTT-3' |

**Table 4. Sequences of primers used for amplification of target genes.**

| Gene       | primer nucleotide sequence             |
|------------|----------------------------------------|
| UBE2C      | Forward: 5'-GCAGTCGTGTTCTCCGAGTT-3'    |
|            | Reverse: 5'-GTCCTGCTGTAGCCTTTTG-3'     |
| LYPLA2     | Forward: 5'-AAGAAGGCAGCAGAGAACATC-3'   |
|            | Reverse: 5'-CTCCCAGGACGATTCGATTG-3'    |
| PPIF       | Forward: 5'- TGGTGACACAGGCCACAGAC-3'   |
|            | Reverse: 5'- CCGGAGCACAGGAGCTTACA-3'   |
| BIRC5      | Forward: 5'-GACGACCCCATGCAAAGGAA-3'    |
|            | Reverse: 5'- GTGGCACCAGGGAATAAACC-3'   |
| ABT1       | Forward: 5'-ACGGGTAGTGCCAGGTATTG-3'    |
|            | Reverse: 5'-CGGTCCTCAGCCTGAAAGAA-3'    |
| PRRC2A     | Forward: 5'-GCCACAGGGATTCCCAATCA-3'    |
|            | Reverse: 5'-TTGGGGGAGTTGCCCTTTTT-3'    |
| TICRR      | Forward: 5'- CACGGGAGACGAAGAGGT-3'     |
|            | Reverse: 5'- CTGGAACAGCAGCGGAGA-3'     |
| ASCC1      | Forward: 5'-CTCACCACGACGAGGACCG-3'     |
|            | Reverse: 5'-TCCAATTATGCCCGTGAGGG-3'    |
| WT1        | Forward: 5'-CCAAATGACATCCCAGCTTG-3'    |
|            | Reverse: 5'-GTGTGGTTATCGCTCTCGTAC-3'   |
| SOWAHC     | Forward: 5'-CTGGTCAAGCGGACTTCAT-3'     |
|            | Reverse: 5'-CTCCGACTCAGGTAAGGGA-3'     |
| E-cadherin | Forward: 5'-CGAGAGCTACACGTTACGG-3'     |
|            | Reverse: 5'-GGGTGTCGAGGAAAAATAGG-3'    |
| N-cadherin | Forward: 5'-TGCGGTACAGTGTAAGTGGG-3'    |
|            | Reverse: 5'-GAAACCGGGCTATCTGCTCG-3'    |
| Vimentin   | Forward: 5'-TGCCGTTGAAGCTGTAATA-3'     |
|            | Reverse: 5'-CCAGAGGGAGTGAATCCAGATTA-3' |
| Snail      | Forward: 5'-ACTGCAACAAGGAATACCTCAG-3'  |
|            | Reverse: 5'-GCACTGGTACTTCTTGACATCTG-3' |
| Twist      | Forward: 5'-ATTCAAAGAAACAGGGCGTGG-3'   |
|            | Reverse: 5'-CCTTTCAGTGGCTGATTGGC-3'    |
| MMP9       | Forward: 5'-TTGACAGCGACAAGAAGTGG-3'    |
|            | Reverse: 5'-GCCATTCACGTCGTCCTTAT-3'    |
| MMP2       | Forward: 5'-TCTCCTGACATTGACCTTGGC-3'   |

|       |                                       |
|-------|---------------------------------------|
|       | Reverse: 5'-CAAGGTGCTGGCTGAGTAGATC-3' |
| CCND1 | Forward: 5'-AAACAGATCATCCGCAAACAC-3'  |
|       | Reverse: 5'-GTTGGGGCTCCTCAGGTTC-3'    |
| MYC   | Forward: 5'-CCTGGTGCTCCATGAGGAGA-3'   |
|       | Reverse: 5'-TCCAGCAGAAGGTGATCCAGAC-3' |
| GAPDH | Forward: 5'-ACCCAGAAGACTGTGGATGG-3'   |
|       | Reverse: 5'-TCAGCTCAGGGATGACCTTG-3'   |

---

### Flow cytometric analysis

The percentage of apoptosis cells were detected by flow cytometry using the Annexin V-FITC staining kit (BD Pharmingen, USA). Briefly, after transfected with siRNA for 24 h, cells were digested, collected and washed three times with PBS, and then resuspended in binding reagent. Annexin v-FITC and PI were then added according to the manufacturer's instructions. A FACS can flow cytometer and FlowJo software (Tree Star Inc., OR, USA) were utilized to analyze the data.

### Cell proliferation and plate clonality assays

The proliferation assay was assessed using Cell Counting Kit-8 (CCK-8). Briefly, cells were seeded into 96-well plates ( $2 \times 10^3$  cells/well). After transfection and drug treatment, the absorbance was measured at different points of time by a microplate reader (Bio-Rad, CA, USA). For colony formation assays, 500 cells were seeded in 6-well plates and cultured for two weeks. After fixation and staining, colony quantity was counted and photographed under the optical microscope.

### Cell migration and invasion assays

For cell migration assay, transfected Hec-1B cells ( $5 \times 10^4$ ) were suspended in 200  $\mu$ L of serum-free medium and seeded onto the upper chambers of the 24-well plates with 8- $\mu$ m-pore filters (Corning, NY, USA). 20% fetal bovine serum was added to the lower chamber medium. For cell invasion assay, the membranes of the top chambers were coated with Matrigel (BD, USA). After using drugs for 18-24h, the crossed cells were fixed, stained and counted at 100 $\times$ magnification.

### Cell wound-healing assay

When cells reached 90% confluence in 6-well plates, a wound was scratched by utilizing with a 10- $\mu$ L micropipette tip. After washing with PBS for three times, the cells were incubated in serum-free media for 48h. The images were photographed under the inverted microscope.

### Statistical analysis

All experiments were performed at least three times. R language software 3.6.3 was used in this study and the data presentation was conducted using Graphpad Prism 7. Statistical analyses between groups were assessed using the Student's t-test. Data are shown as mean  $\pm$  SD. P-values  $< 0.05$  were defined as statistically significant.

### Data availability statement

The authors confirm that all data analyzed in the current study are available within the paper and its supplementary files.

### AUTHOR CONTRIBUTIONS

Linlin Yang designed the research, performed the experiments and analyzed the results. Yunxia Cui downloaded the relevant information. Xiao Sun and Yudong Wang assessed and commented on the paper. All authors have edited and approved the final version of the study.

### CONFLICTS OF INTEREST

The authors declared that no conflicts of interest exists.

### FUNDING

This study was funded by Shanghai Municipal Key Clinical Specialty (No. shslczdzk06302), National Natural Science Foundation of China (No. 81172477, 81402135), the Project of the Science and Technology Commission of Shanghai Municipality (No. 17441907400) and Shanghai Jiao Tong University Medicine-Engineering Fund (No. YG2017MS41).

### REFERENCES

1. Murali R, Soslow RA, Weigelt B. Classification of endometrial carcinoma: more than two types. *Lancet Oncol.* 2014; 15:e268–78. [https://doi.org/10.1016/S1470-2045\(13\)70591-6](https://doi.org/10.1016/S1470-2045(13)70591-6) PMID:24872110

2. Bray F, Ferlay J, Soerjomataram I, Siegel RL, Torre LA, Jemal A. Global cancer statistics 2018: GLOBOCAN estimates of incidence and mortality worldwide for 36 cancers in 185 countries. *CA Cancer J Clin.* 2018; 68:394–424.  
<https://doi.org/10.3322/caac.21492> PMID:[30207593](https://pubmed.ncbi.nlm.nih.gov/30207593/)
3. Torre LA, Bray F, Siegel RL, Ferlay J, Lortet-Tieulent J, Jemal A. Global cancer statistics, 2012. *CA Cancer J Clin.* 2015; 65:87–108.  
<https://doi.org/10.3322/caac.21262> PMID:[25651787](https://pubmed.ncbi.nlm.nih.gov/25651787/)
4. Wartko P, Sherman ME, Yang HP, Felix AS, Brinton LA, Trabert B. Recent changes in endometrial cancer trends among menopausal-age U.S. Women. *Cancer Epidemiol.* 2013; 37:374–77.  
<https://doi.org/10.1016/j.canep.2013.03.008> PMID:[23591011](https://pubmed.ncbi.nlm.nih.gov/23591011/)
5. Creasman WT, Odicino F, Maisonneuve P, Quinn MA, Beller U, Benedet JL, Heintz AP, Ngan HY, Pecorelli S. Carcinoma of the corpus uteri. FIGO 26th Annual Report on the Results of Treatment in Gynecological Cancer. *Int J Gynaecol Obstet.* 2006; 95:S105–43.  
[https://doi.org/10.1016/S0020-7292\(06\)60031-3](https://doi.org/10.1016/S0020-7292(06)60031-3) PMID:[17161155](https://pubmed.ncbi.nlm.nih.gov/17161155/)
6. Connor EV, Rose PG. Management strategies for recurrent endometrial cancer. *Expert Rev Anticancer Ther.* 2018; 18:873–85.  
<https://doi.org/10.1080/14737140.2018.1491311> PMID:[29972650](https://pubmed.ncbi.nlm.nih.gov/29972650/)
7. Bai M, Yang L, Liao H, Liang X, Xie B, Xiong J, Tao X, Chen X, Cheng Y, Chen X, Feng Y, Zhang Z, Zheng W. Metformin sensitizes endometrial cancer cells to chemotherapy through IDH1-induced Nrf2 expression via an epigenetic mechanism. *Oncogene.* 2018; 37:5666–81.  
<https://doi.org/10.1038/s41388-018-0360-7> PMID:[29921847](https://pubmed.ncbi.nlm.nih.gov/29921847/)
8. Wang J, Sun X, Zhang H, Wang Y, Li Y. MPA influences tumor cell proliferation, migration, and invasion induced by RANKL through PRB involving the MAPK pathway in endometrial cancer. *Oncol Rep.* 2015; 33:799–809.  
<https://doi.org/10.3892/or.2014.3651> PMID:[25483570](https://pubmed.ncbi.nlm.nih.gov/25483570/)
9. Ni T, Huang T, Gu SL, Wang J, Liu Y, Sun X, Wang YD. DRG neurons promote perineural invasion of endometrial cancer via GluR2. *J Cancer.* 2020; 11:2518–28.  
<https://doi.org/10.7150/jca.40055> PMID:[32201522](https://pubmed.ncbi.nlm.nih.gov/32201522/)
10. Gu S, Ni T, Wang J, Liu Y, Fan Q, Wang Y, Huang T, Chu Y, Sun X, Wang Y. CD47 blockade inhibits tumor progression through promoting phagocytosis of tumor cells by M2 polarized macrophages in endometrial cancer. *J Immunol Res.* 2018; 2018:6156757.  
<https://doi.org/10.1155/2018/6156757> PMID:[30525058](https://pubmed.ncbi.nlm.nih.gov/30525058/)
11. Barbieri CE, Chinnaiyan AM, Lerner SP, Swanton C, Rubin MA. The emergence of precision urologic oncology: a collaborative review on biomarker-driven therapeutics. *Eur Urol.* 2017; 71:237–46.  
<https://doi.org/10.1016/j.eururo.2016.08.024> PMID:[27567210](https://pubmed.ncbi.nlm.nih.gov/27567210/)
12. Giulietti M, Occhipinti G, Principato G, Piva F. Weighted gene co-expression network analysis reveals key genes involved in pancreatic ductal adenocarcinoma development. *Cell Oncol (Dordr).* 2016; 39:379–88.  
<https://doi.org/10.1007/s13402-016-0283-7> PMID:[27240826](https://pubmed.ncbi.nlm.nih.gov/27240826/)
13. Tang J, Yang Q, Cui Q, Zhang D, Kong D, Liao X, Ren J, Gong Y, Wu G. Weighted gene correlation network analysis identifies RSAD2, HERC5, and CCL8 as prognostic candidates for breast cancer. *J Cell Physiol.* 2020; 235:394–407.  
<https://doi.org/10.1002/jcp.28980> PMID:[31225658](https://pubmed.ncbi.nlm.nih.gov/31225658/)
14. Kandoth C, McLellan MD, Vandin F, Ye K, Niu B, Lu C, Xie M, Zhang Q, McMichael JF, Wyczalkowski MA, Leiserson MD, Miller CA, Welch JS, et al. Mutational landscape and significance across 12 major cancer types. *Nature.* 2013; 502:333–39.  
<https://doi.org/10.1038/nature12634> PMID:[24132290](https://pubmed.ncbi.nlm.nih.gov/24132290/)
15. Ru B, Wong CN, Tong Y, Zhong JY, Zhong SS, Wu WC, Chu KC, Wong CY, Lau CY, Chen I, Chan NW, Zhang J. TISIDB: an integrated repository portal for tumor-immune system interactions. *Bioinformatics.* 2019; 35:4200–02.  
<https://doi.org/10.1093/bioinformatics/btz210> PMID:[30903160](https://pubmed.ncbi.nlm.nih.gov/30903160/)
16. Chandrashekar DS, Bashel B, Balasubramanya SA, Creighton CJ, Ponce-Rodriguez I, Chakravarthi BV, Varambally S. UALCAN: a portal for facilitating tumor subgroup gene expression and survival analyses. *Neoplasia.* 2017; 19:649–58.  
<https://doi.org/10.1016/j.neo.2017.05.002> PMID:[28732212](https://pubmed.ncbi.nlm.nih.gov/28732212/)
17. Song ZY, Chao F, Zhuo Z, Ma Z, Li W, Chen G. Identification of hub genes in prostate cancer using robust rank aggregation and weighted gene co-expression network analysis. *Aging (Albany NY).* 2019; 11:4736–56.  
<https://doi.org/10.18632/aging.102087> PMID:[31306099](https://pubmed.ncbi.nlm.nih.gov/31306099/)
18. Ritchie ME, Phipson B, Wu D, Hu Y, Law CW, Shi W, Smyth GK. Limma powers differential expression analyses for RNA-sequencing and microarray studies. *Nucleic Acids Res.* 2015; 43:e47.  
<https://doi.org/10.1093/nar/gkv007> PMID:[25605792](https://pubmed.ncbi.nlm.nih.gov/25605792/)

19. Mitsuhashi A, Kawasaki Y, Hori M, Fujiwara T, Hanaoka H, Shozu M. Medroxyprogesterone acetate plus metformin for fertility-sparing treatment of atypical endometrial hyperplasia and endometrial carcinoma: trial protocol for a prospective, randomised, open, blinded-endpoint design, dose-response trial (FELICIA trial). *BMJ Open*. 2020; 10:e035416.  
<https://doi.org/10.1136/bmjopen-2019-035416>  
PMID:[32114477](https://pubmed.ncbi.nlm.nih.gov/32114477/)
20. Becht E, Giraldo NA, Lacroix L, Buttard B, Elarouci N, Petitprez F, Selves J, Laurent-Puig P, Sautès-Fridman C, Fridman WH, de Reyniès A. Estimating the population abundance of tissue-infiltrating immune and stromal cell populations using gene expression. *Genome Biol*. 2016; 17:218.  
<https://doi.org/10.1186/s13059-016-1070-5>  
PMID:[27765066](https://pubmed.ncbi.nlm.nih.gov/27765066/)
21. Hanahan D, Weinberg RA. Hallmarks of cancer: the next generation. *Cell*. 2011; 144:646–74.  
<https://doi.org/10.1016/j.cell.2011.02.013>  
PMID:[21376230](https://pubmed.ncbi.nlm.nih.gov/21376230/)
22. Liu J, Zhou S, Li S, Jiang Y, Wan Y, Ma X, Cheng W. Eleven genes associated with progression and prognosis of endometrial cancer (EC) identified by comprehensive bioinformatics analysis. *Cancer Cell Int*. 2019; 19:136.  
<https://doi.org/10.1186/s12935-019-0859-1>  
PMID:[31139013](https://pubmed.ncbi.nlm.nih.gov/31139013/)
23. Huo X, Sun H, Liu Q, Ma X, Peng P, Yu M, Zhang Y, Cao D, Shen K. Clinical and expression significance of AKT1 by co-expression network analysis in endometrial cancer. *Front Oncol*. 2019; 9:1147.  
<https://doi.org/10.3389/fonc.2019.01147>  
PMID:[31781484](https://pubmed.ncbi.nlm.nih.gov/31781484/)
24. Yang JF, Shi SN, Xu WH, Qiu YH, Zheng JZ, Yu K, Song XY, Li F, Wang Y, Wang R, Qu YY, Zhang HL, Zhou XQ. Screening, identification and validation of CCND1 and PECAM1/CD31 for predicting prognosis in renal cell carcinoma patients. *Aging (Albany NY)*. 2019; 11:12057–79.  
<https://doi.org/10.18632/aging.102540>  
PMID:[31850854](https://pubmed.ncbi.nlm.nih.gov/31850854/)
25. Uhlen M, Zhang C, Lee S, Sjöstedt E, Fagerberg L, Bidkhori G, Benfeitas R, Arif M, Liu Z, Edfors F, Sanli K, von Feilitzen K, Oksvold P, et al. A pathology atlas of the human cancer transcriptome. *Science*. 2017; 357:eaan2507.  
<https://doi.org/10.1126/science.aan2507>  
PMID:[28818916](https://pubmed.ncbi.nlm.nih.gov/28818916/)
26. Sansam CL, Cruz NM, Danielian PS, Amsterdam A, Lau ML, Hopkins N, Lees JA. A vertebrate gene, *Ticrr*, is an essential checkpoint and replication regulator. *Genes Dev*. 2010; 24:183–94.  
<https://doi.org/10.1101/gad.1860310>  
PMID:[20080954](https://pubmed.ncbi.nlm.nih.gov/20080954/)
27. Sansam CG, Goins D, Siefert JC, Clowdus EA, Sansam CL. Cyclin-dependent kinase regulates the length of S phase through TICRR/TRESLIN phosphorylation. *Genes Dev*. 2015; 29:555–66.  
<https://doi.org/10.1101/gad.246827.114>  
PMID:[25737283](https://pubmed.ncbi.nlm.nih.gov/25737283/)
28. Mulay SR, Honarpisheh MM, Foresto-Neto O, Shi C, Desai J, Zhao ZB, Marschner JA, Popper B, Buhl EM, Boor P, Linkermann A, Liapis H, Bilyy R, et al. Mitochondria permeability transition versus necroptosis in oxalate-induced AKI. *J Am Soc Nephrol*. 2019; 30:1857–69.  
<https://doi.org/10.1681/ASN.2018121218>  
PMID:[31296606](https://pubmed.ncbi.nlm.nih.gov/31296606/)
29. Baines CP, Kaiser RA, Purcell NH, Blair NS, Osinska H, Hambleton MA, Brunskill EW, Sayen MR, Gottlieb RA, Dorn GW, Robbins J, Molkentin JD. Loss of cyclophilin D reveals a critical role for mitochondrial permeability transition in cell death. *Nature*. 2005; 434:658–62.  
<https://doi.org/10.1038/nature03434> PMID:[15800627](https://pubmed.ncbi.nlm.nih.gov/15800627/)
30. Irizarry RA, Hobbs B, Collin F, Beazer-Barclay YD, Antonellis KJ, Scherf U, Speed TP. Exploration, normalization, and summaries of high density oligonucleotide array probe level data. *Biostatistics*. 2003; 4:249–64.  
<https://doi.org/10.1093/biostatistics/4.2.249>  
PMID:[12925520](https://pubmed.ncbi.nlm.nih.gov/12925520/)
31. Langfelder P, Horvath S. WGCNA: an R package for weighted correlation network analysis. *BMC Bioinformatics*. 2008; 9:559.  
<https://doi.org/10.1186/1471-2105-9-559>  
PMID:[19114008](https://pubmed.ncbi.nlm.nih.gov/19114008/)
32. Chen D, Bao C, Zhao F, Yu H, Zhong G, Xu L, Yan S. Exploring specific miRNA-mRNA axes with relationship to Taxanes-resistance in breast cancer. *Front Oncol*. 2020; 10:1397.  
<https://doi.org/10.3389/fonc.2020.01397>  
PMID:[32974144](https://pubmed.ncbi.nlm.nih.gov/32974144/)
33. Liu H, Zhang J, Yuan J, Jiang X, Jiang L, Li Z, Yin Z, Du Y, Zhao G, Liu B, Huang D. Gene coexpression network analysis reveals a novel metabolic mechanism of *Clostridium acetobutylicum* responding to phenolic inhibitors from lignocellulosic hydrolysates. *Biotechnol Biofuels*. 2020; 13:163.  
<https://doi.org/10.1186/s13068-020-01802-z>  
PMID:[32999686](https://pubmed.ncbi.nlm.nih.gov/32999686/)
34. Cao P, Li H, Zuo Y, Nashun B. Characterization of DNA methylation patterns and mining of epigenetic markers during genomic reprogramming in SCNT embryos. *Front Cell Dev Biol*. 2020; 8:570107.

- <https://doi.org/10.3389/fcell.2020.570107>  
PMID:[32984351](https://pubmed.ncbi.nlm.nih.gov/32984351/)
35. Bindea G, Mlecnik B, Hackl H, Charoentong P, Tosolini M, Kirilovsky A, Fridman WH, Pagès F, Trajanoski Z, Galon J. ClueGO: a cytoscape plug-in to decipher functionally grouped gene ontology and pathway annotation networks. *Bioinformatics*. 2009; 25:1091–93.  
<https://doi.org/10.1093/bioinformatics/btp101>  
PMID:[19237447](https://pubmed.ncbi.nlm.nih.gov/19237447/)
36. Bindea G, Galon J, Mlecnik B. CluePedia Cytoscape plugin: pathway insights using integrated experimental and in silico data. *Bioinformatics*. 2013; 29:661–63.  
<https://doi.org/10.1093/bioinformatics/btt019>  
PMID:[23325622](https://pubmed.ncbi.nlm.nih.gov/23325622/)
37. Huang da W, Sherman BT, Lempicki RA. Bioinformatics enrichment tools: paths toward the comprehensive functional analysis of large gene lists. *Nucleic Acids Res*. 2009; 37:1–13.  
<https://doi.org/10.1093/nar/gkn923>  
PMID:[19033363](https://pubmed.ncbi.nlm.nih.gov/19033363/)
38. Zhou Y, Zhou B, Pache L, Chang M, Khodabakhshi AH, Tanaseichuk O, Benner C, Chanda SK. Metascape provides a biologist-oriented resource for the analysis of systems-level datasets. *Nat Commun*. 2019; 10:1523.  
<https://doi.org/10.1038/s41467-019-09234-6>  
PMID:[30944313](https://pubmed.ncbi.nlm.nih.gov/30944313/)
39. Gao J, Aksoy BA, Dogrusoz U, Dresdner G, Gross B, Sumer SO, Sun Y, Jacobsen A, Sinha R, Larsson E, Cerami E, Sander C, Schultz N. Integrative analysis of complex cancer genomics and clinical profiles using the cBioPortal. *Sci Signal*. 2013; 6:pl1.  
<https://doi.org/10.1126/scisignal.2004088>  
PMID:[23550210](https://pubmed.ncbi.nlm.nih.gov/23550210/)
40. Asplund A, Edqvist PH, Schwenk JM, Pontén F. Antibodies for profiling the human proteome—the Human Protein Atlas as a resource for cancer research. *Proteomics*. 2012; 12:2067–77.  
<https://doi.org/10.1002/pmic.201100504>  
PMID:[22623277](https://pubmed.ncbi.nlm.nih.gov/22623277/)
41. Györfy B, Lanczky A, Eklund AC, Denkert C, Budczies J, Li Q, Szallasi Z. An online survival analysis tool to rapidly assess the effect of 22,277 genes on breast cancer prognosis using microarray data of 1,809 patients. *Breast Cancer Res Treat*. 2010; 123:725–31.  
<https://doi.org/10.1007/s10549-009-0674-9>  
PMID:[20020197](https://pubmed.ncbi.nlm.nih.gov/20020197/)
42. Zhong X, Liu Y, Liu H, Zhang Y, Wang L, Zhang H. Identification of potential prognostic genes for neuroblastoma. *Front Genet*. 2018; 9:589.  
<https://doi.org/10.3389/fgene.2018.00589>  
PMID:[30555514](https://pubmed.ncbi.nlm.nih.gov/30555514/)
43. Gou R, Zhu L, Zheng M, Guo Q, Hu Y, Li X, Liu J, Lin B. Annexin A8 can serve as potential prognostic biomarker and therapeutic target for ovarian cancer: based on the comprehensive analysis of annexins. *J Transl Med*. 2019; 17:275.  
<https://doi.org/10.1186/s12967-019-2023-z>  
PMID:[31474227](https://pubmed.ncbi.nlm.nih.gov/31474227/)
44. Subramanian A, Kuehn H, Gould J, Tamayo P, Mesirov JP. GSEA-P: a desktop application for gene set enrichment analysis. *Bioinformatics*. 2007; 23:3251–53.  
<https://doi.org/10.1093/bioinformatics/btm369>  
PMID:[17644558](https://pubmed.ncbi.nlm.nih.gov/17644558/)
45. Hänzelmann S, Castelo R, Guinney J. GSEA: gene set variation analysis for microarray and RNA-seq data. *BMC Bioinformatics*. 2013; 14:7.  
<https://doi.org/10.1186/1471-2105-14-7>  
PMID:[23323831](https://pubmed.ncbi.nlm.nih.gov/23323831/)

SUPPLEMENTARY MATERIALS

Supplementary Figures

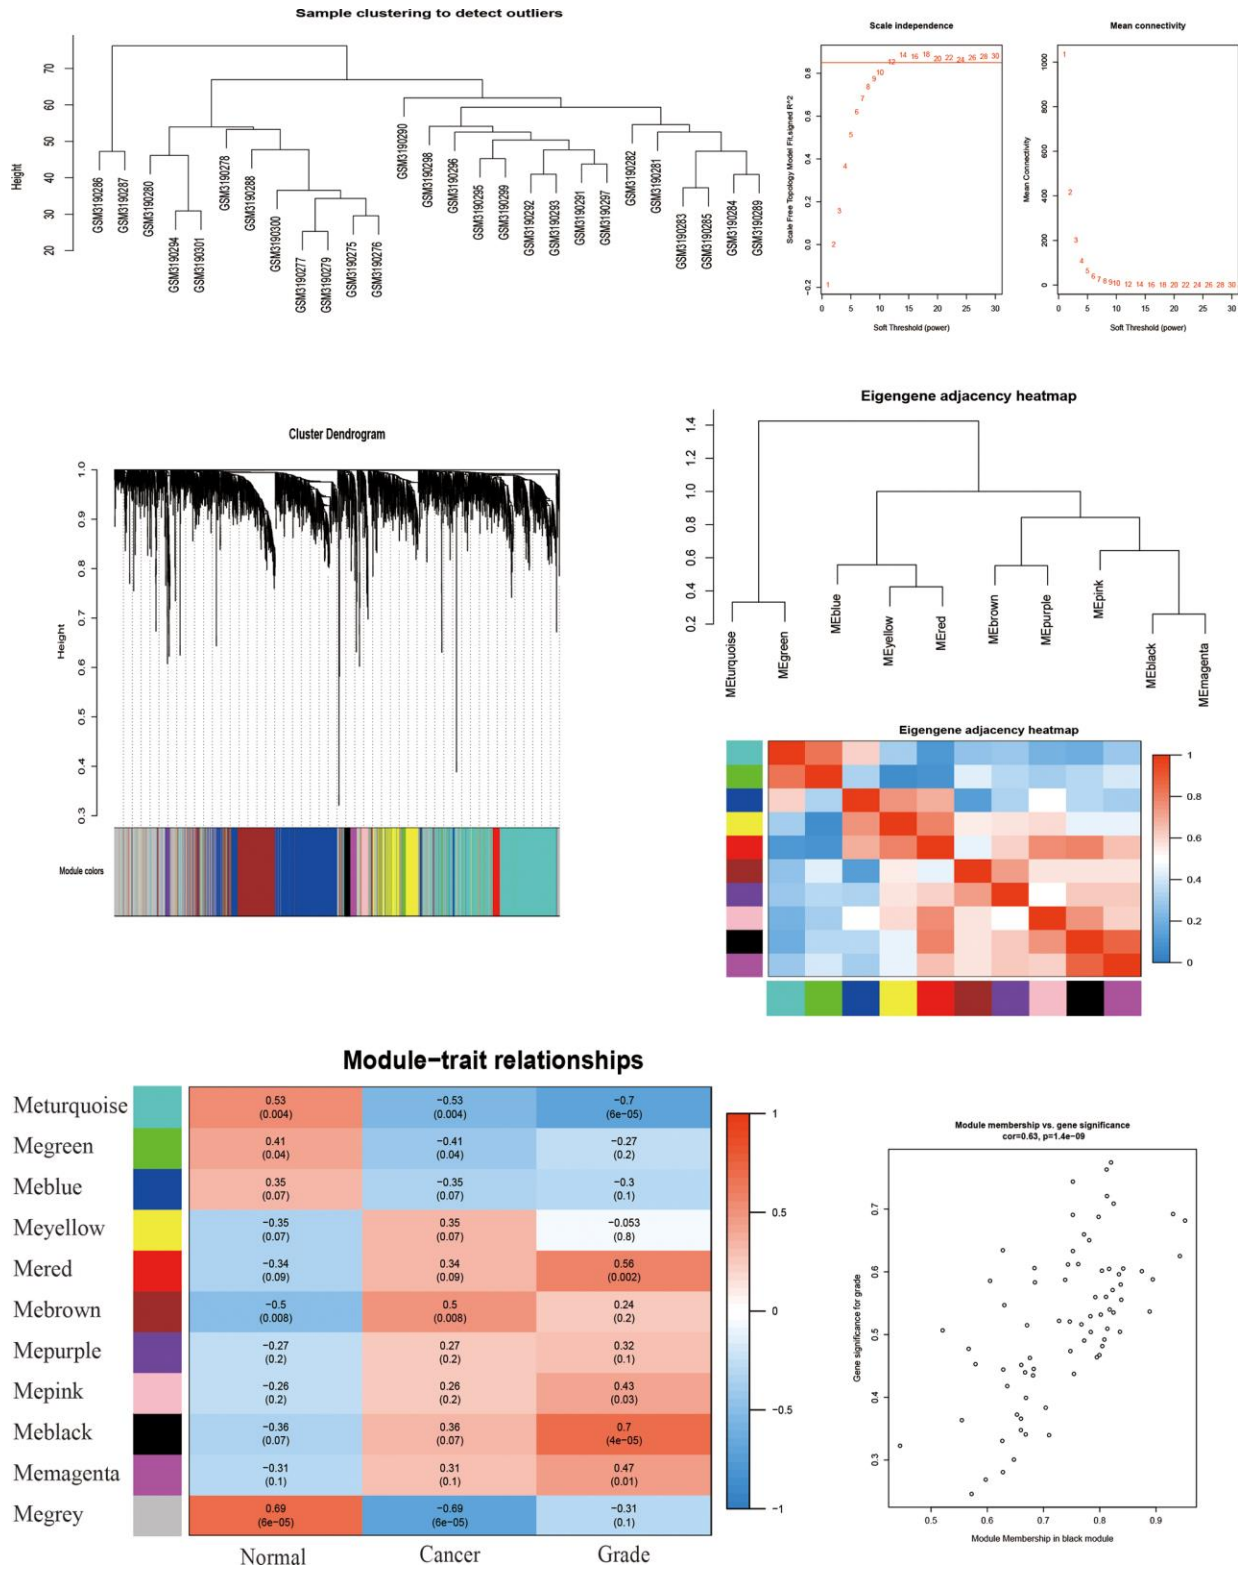

Supplementary Figure 1. Co-expression network analysis for GSE115810.

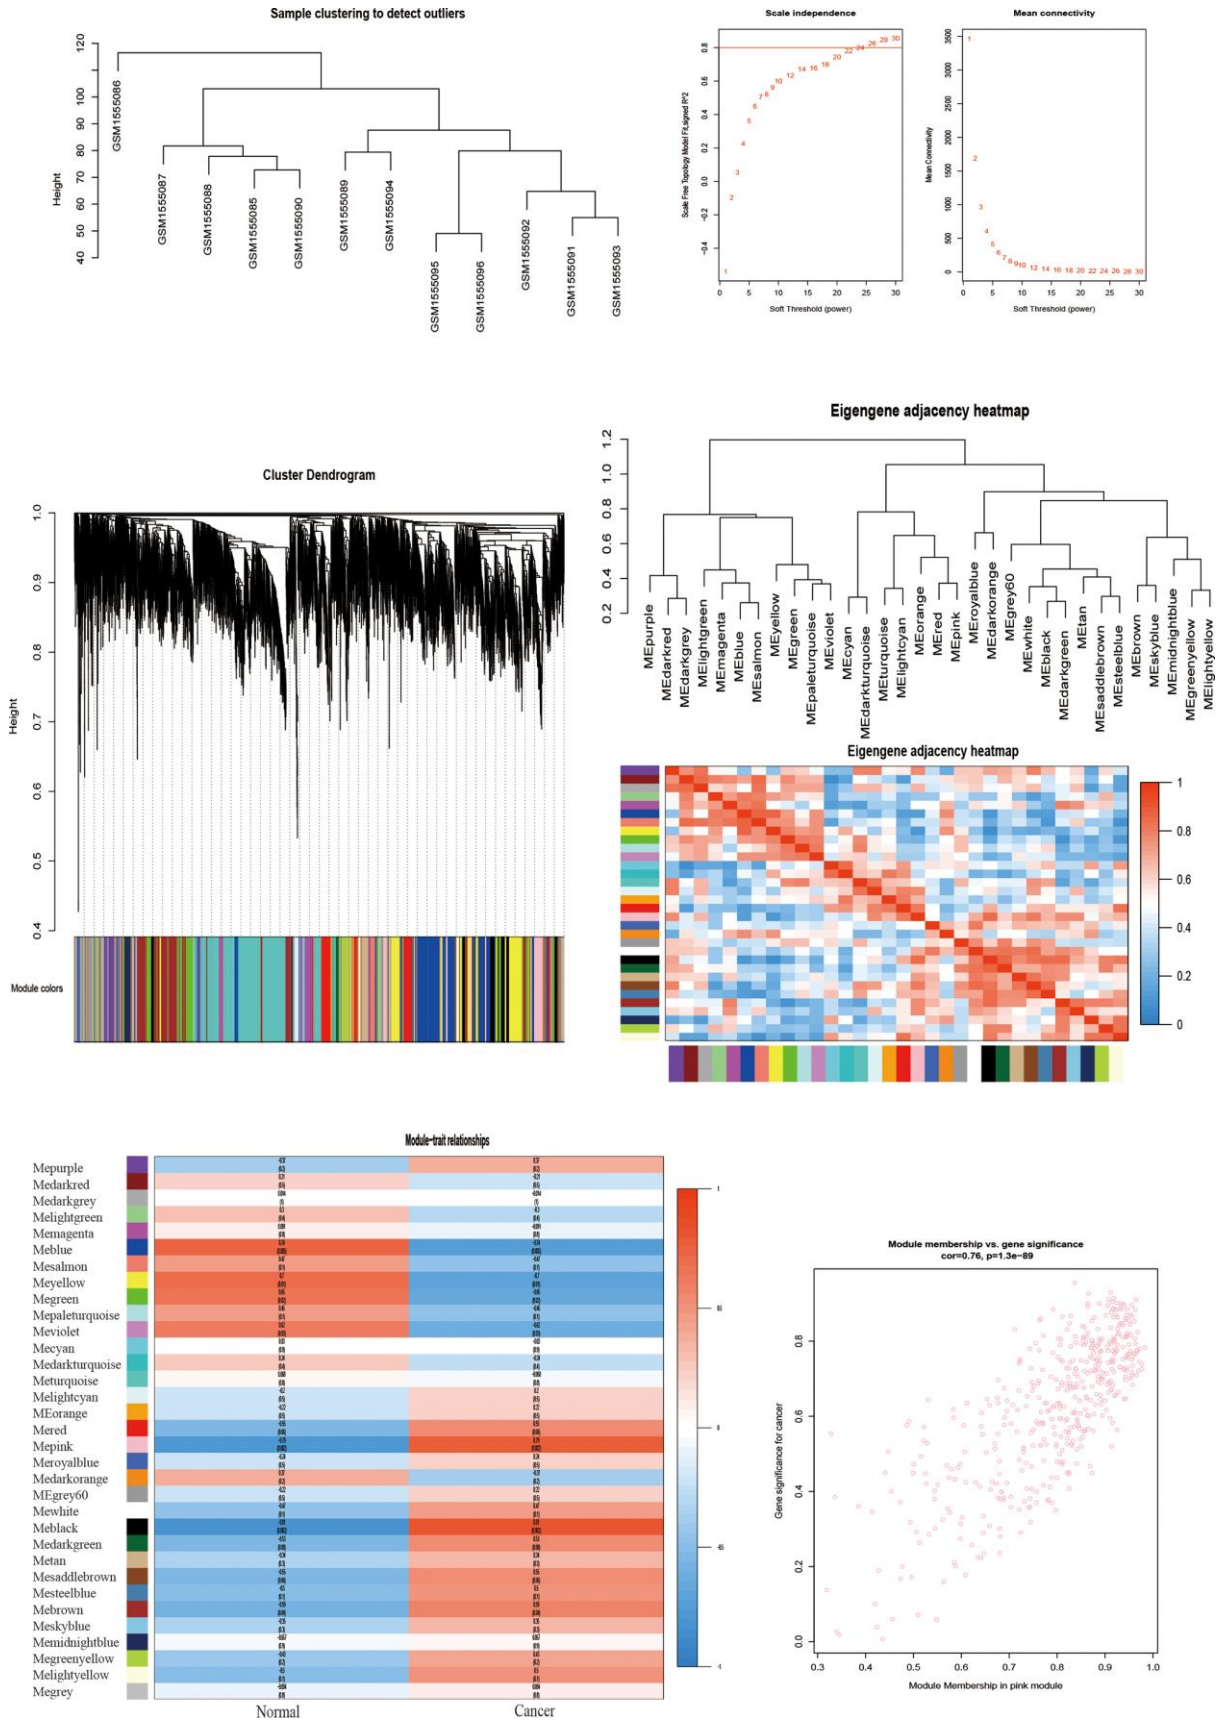

Supplementary Figure 2. Co-expression network analysis for GSE63678.

■ Current Gene ■ Drug ■ Other Target

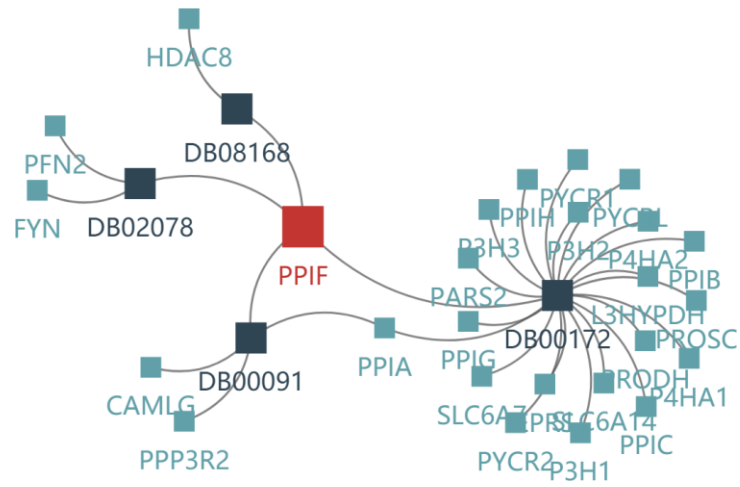

**Supplementary Figure 3. Drugs targeting PPIF collected from DrugBank database.** DB00091: Cyclosporine, DB00172: L-Proline, DB02078: Triglyme, DB08168: 7-AMINO-4-METHYL-CHROMEN-2-ONE.



## Supplementary Tables

Please browse Full Text version to see the data of Supplementary Tables 1, 2.

**Supplementary Table 1. Detailed lists of the intersection DEGs of GSE17025, GSE63678, GSE115810 and TCGA-UCEC.**

**Supplementary Table 2. Detailed lists of the intersection genes of the selected modules.**

**Supplementary Table 3. Detailed lists of the 16 common genes.**

| DEGs      | WGCNA     | DEGs WGCNA |
|-----------|-----------|------------|
| HSPA4     | HMGB1P1   | UBE2C      |
| ABLIM1    | ABCF1     | SOWAHC     |
| PRKRIRP6  | ABCF2     | CYR61      |
| DDHD1     | ABCG1     | MYO15B     |
| SLC18A1   | ACAA2     | ARHGAP10   |
| STYX      | ACAT2     | GNG11      |
| ANP32B    | ACBD7     | LYPLA2     |
| BCAS2P2   | ACE       | PLS1       |
| C17orf98  | ACOT7     | PPIF       |
| UGT1A6    | ACP1      | BIRC5      |
| ROPN1L    | ACVR2B    | PRRC2A     |
| SMIM5     | ADD2      | TICRR      |
| C20orf202 | ADIPOR2   | MUC1       |
| RN7SL801P | ADSL      | VAMP8      |
| RN7SL567P | AFG3L2    | WT1        |
| ATAD2B    | TROAP     | CXCL12     |
| PEAR1     | LINC00667 |            |
| RNA5SP18  | NDN       |            |
| HMGNI1P3  |           |            |
| BET1      |           |            |
| C14orf159 |           |            |
| CLEC10A   |           |            |
| STAMBPL1  |           |            |
| SDHCP3    |           |            |
| PCED1A    |           |            |
| PNMA1     |           |            |
| CSNK1A1P1 |           |            |
| RN7SL446P |           |            |
| SLC25A36  |           |            |
| BNIP3P30  |           |            |
| YIPF7     |           |            |
| SORT1     |           |            |
| MYO9A     |           |            |
| ARMC8P1   |           |            |
| CMTR1     |           |            |

CEACAM8  
ADAMTS16  
ASCC1  
ABT1

---
