# Supplementary material for: Overexpression of TICRR and PPIF confer poor prognosis in endometrial cancer identified by gene co-expression network analysis
Source: Aging (Albany NY). 2021 Jan 20;13(3):4564–89. doi: 10.18632/aging.202417 (PMC7906164; doi:10.18632/aging.202417)
Supplement: Supplementary Table 1 [file aging-13-202417-s002.xls]

## Sheet: Supplementary Table 1
Supplementary Table 1. Detailed lists of the intersection DEGs of GSE17025, GSE63678, GSE115810 and TCGA-UCEC.
GSE17025	GSE63678	GSE115810	TCGA	GSE17025|GSE63678	GSE17025|GSE115810	GSE17025|TCGA	GSE63678|GSE115810	GSE63678|TCGA	GSE115810|TCGA	GSE17025|GSE63678|GSE115810	GSE17025|GSE63678|TCGA	GSE17025|GSE115810|TCGA	GSE63678|GSE115810|TCGA	GSE17025|GSE63678|GSE115810|TCGA
CCL20	PCK2	CP	LRRTM4	MELK	IGH /// IGHA1 /// IGHA2	FAM83D	ESRP2 /// MIR6773	ESRP1	C3	ST14	RRM2	PI3	C16orf45	SORT1
HK2	CENPU	SLPI	GRID2	DLGAP5	LTF	SPC25	LSR	CRIP1	GRIA2	MUC1	CEP55	FOXJ1		EZR
KANK4	LYPLA1	CFB	GATB	MMP12	SAA1 /// SAA2	HES6	SPINT2	PSMD14	TWF1	CKMT1A /// CKMT1B	CENPE	FJX1		STYX
ELF5	IDE	LEFTY1	CYP2R1	TPX2	S100A8	LIN28B	LOXL1	LRRC59	TSPYL2	VAMP8	HMMR	NR3C1		SMIM5
ANLN	CCNB2	PDZK1IP1	S100A7	FOXM1	CXCL14	GAD1	EPS8L2	SYT17	CHSY1	S100A10	CDCA3	ADAMTS5		BNC2
CXCL9	KCTD14 /// NDUFC2-KCTD14	AOC1	RN7SL178P	KIF15	VAV3	CEACAM6	RBM47	ITPR3	FAM216A	PDS5B	DTL	WFDC1		PCED1A
LIPG	TSSC1	PERP	DBT	TACC3	HP /// HPR	ESM1	GSR	LLGL2	RBMS1	GABBR1	KIF18A	HBB		DCHS1
MALL	MIR3658 /// UCK2	SRRM2	MC3R	CENPA /// SLC35F6	SPP1	PTTG3P	EPCAM	PSMB8	ATP2A2	TRO	MTCH2	DPP6		BHMT2
FOXA1	AP1S1	AGR2	AMFR	PBK	SFN	IGF2BP3	ENO1	BID	TCF4	WNT2	SDF2L1	SRPX		MXRA8
CXCL13	RACGAP1	SCAF11	RFPL3	CDCA8	TMPRSS4	TMC5	OLFML2A	AKAP9	CORO2B	CDO1	CRBN	NAP1L3		EFS
LGSN	DBI	EHF	PRPS1L1	NEK2	S100A9	SPC24	UBE2I	ZNF160	CBX6	MAGEH1	ROR2	GABRP		CXCL12
S100P	BORA	PRSS8	RPL7P47	ASPM	SAA1 /// SAA2 /// SAA2-SAA4	ADM	DIP2C	IGFBP3	CSRP2	GPRASP1	KIAA1644	FOSB		OSR2
MND1	PTPN3	NBPF10 /// NBPF14 /// NBPF26 /// NBPF9	PITPNA	NCAPG	TFF3	HEY1	CACNB3	GATAD1	COL1A2	NDN	NMT2			UBE2C
ZIC2	CKAP2	CLU	NMD3P1	CENPF	S100A2	IGFBPL1	RNF144A	MPHOSPH8	TMEM204	TSPYL5	ZFP2			SOWAHC
BC022892	RPS6KA1	CLDN4	CYP4F9P	NDC80	HP	KIF18B	MITF	EHBP1	RAB31	WT1-AS	TCEAL2			CYR61
CXCL6	TUBG1	SERPINA3	ZNF286B	ISG15	LCN2	ICOS	ZMIZ1	TMEM35	FBLN5	ARMCX1				MYO15B
CAPN13	PPA1	MSLN	ADAMTS17	CDC20	SERPINA1	GBP5	SYNE1	DCX	CRABP2	GSPT2				ARHGAP10
NUF2	TLR3	SCGB2A1	CTRC	TOP2A	DDIT4	CDC25A	TBX3	ARID5B	VCAN	KLF3-AS1				GNG11
LAMP3	KRT18	PROM1	ZNF157	KIF20A	GLUL	PVRL4	VSTM4	PSD		PEG3				LYPLA2
CHST6	DLEU1	RAB25	RN7SKP30	KIF14	SLC7A5	TNFRSF17	JAM3	BACH2		HAND2-AS1				PLS1
FAM72A /// FAM72B /// FAM72C /// FAM72D	ARL4C	SLC44A4	DECR1	KIF11	CDH3	SCGB1D1	CLIP3							PPIF
PPP1R14C	PAQR4	FCGBP	MTX3	E2F8	TMEM158	WFDC5	AKT3							BIRC5
KRT6A	CDK5	CDH1	C9orf152	TTK	PTPRF	C12orf5								ASCC1
LYPD1	OSBPL3	LAD1	PEX19	HJURP	TGFBI	OAS3								PRRC2A
IGHG1 /// IGHG2 /// IGHM /// IGHV4-31 /// MIR8071-1 /// MIR8071-2	ORMDL2	C4BPA	CCDC9	GMDS	MISP	CXCR2								TICRR
COCH	TPD52L1	LOC102724250 /// NBPF1 /// NBPF10 /// NBPF11 /// NBPF14 /// NBPF15 /// NBPF19 /// NBPF26	SDHAF2	KIAA0101	THY1	STRIP2								MUC1
MYBL2	SLC22A18	VTCN1	OR5F1	PTTG1	INPP5F	DPP4								VAMP8
DIAPH3	CCND1	CLDN3	SNORA80E	MKI67	HOXA11	MIR4296								WT1
SFRP2	APEH	GABBR1 /// UBD	FKBP3	UBE2C	PMP22	RHOV								HMGN1P3
MAL	NDC1	IGH /// IGHA1 /// IGHA2 /// IGHD /// IGHG1 /// IGHG3 /// IGHG4 /// IGHM /// IGHV3-23 /// IGHV4-31	YWHAEP7	KRT8	PTH1R	LRRIQ1								BET1
SPINK5	DPP3	SPINT1	SMPD4P2	KIF23	ABCG2	VDAC3								C14orf159
NQO1	MT1H	PLOD2	C9orf173	CCNB1	GLIPR1	SGOL2								CLEC10A
LHX2	RMDN1	PAX8	MIR5700	NUSAP1	COL5A1	PLAUR								STAMBPL1
SLC38A1	KDELR3	UBE2H	MEGF8	HN1	SETBP1	FBXL19								SDHCP3
CA2	GLB1 /// TMPPE	PIGR	RPL21P44	KIF4A	LOC102724229 /// RASA4 /// RASA4B	ITGB2								PNMA1
DEPDC1B	PDIA3	ALPPL2	PITHD1	AURKA	C9orf3	TES								CSNK1A1P1
IFI30 /// PIK3R2	TJP3	FOLR1	SP2	VDAC1	TMSB15A /// TMSB15B	ETS1								RN7SL446P
CXCL8	TSPO	CD24	TMEM214	CLDN7	RGL1	INHBA								SLC25A36
RNFT2	GGH	KIAA1033	MIR3169	BIRC5	TGFB1I1	CBL								BNIP3P30
FOXG1	TPD52	SOX9	PYY	ESPL1	CLEC2B	DCBLD2								YIPF7
SULF1	MPZL2	ALPP	MTND6P16	CDK1	C3orf14	CKAP2L								MYO9A
E2F7	ACOT13	CHI3L1	OR56A4	PRC1	IL11RA	PRDX1								ARMC8P1
NCAPH	HTATIP2	DEPTOR	DUSP14	GPI	IGFBP6	CFL1								CMTR1
HIST1H2AM	TPI1	LAMB3	OR10T1P	KPNA2	IRS2	SPINK7								CEACAM8
HAPLN1	IDH1	DHX9	MTND2P22	DHCR24	PTCH1	MILR1								ADAMTS16
SHCBP1	UCHL3	EIF2S3	HIST2H2AB	SMC4	COL15A1	FIGN
CDCA2	BOLA2 /// BOLA2B	LGR5	TM9SF4	TRIP13	EMILIN1	GINS1
CCDC160	SLC39A4	BCAT1	BTF3L4P3	S100A11	EPM2AIP1	GK
KISS1R	NFE2L3	NR2F6	MIR3685	GAPDH	LDB2	HOXC8
CTSV	CMC2	PBX1	RNA5SP30	ZWINT	PDGFRL	MICAL2
PAX6	GMNN	IFFO1	TRMU	CKS2	SLC2A10	WARS
DEPDC1	USP18	MGRN1	UBA5	CDKN3	FAP	FGD6
BAI2	EPB41L4B	ZBTB38	OLFM3	LMNB1	COL16A1	KRT80
CXCL10	SLC31A2	VWF	C9orf147	TAGLN2	CTSK	CDC20B
RAD54L	ENDOG	MAP3K12	SLC25A1P4	UBE2S	OLFML1	ACLY
EXO1	PLS1	CILP	GSX2	KIF2C	RAMP1	HUNK
SLC16A10	SLC29A2	ELP5	NSUN5	PCCB	TPST1	FTX
MMP9	PPAP2C	DPY19L1	APOC4	ECT2	PCSK5	NPAP1
IGKV1-17 /// IGKV1-17	GDE1	MAGED1	DRGX	TK1	WNT4	POF1B
CXCL17	FEN1	SLC18A2	SCD5	ANXA2	FBN1	PTPN22
ADAMDEC1	LRBA	SPOCK1	CGB7	BUB1B	CEP68	MTFR1
DBNDD1	MT1X	C20orf27	GSTA12P	TYMS	NLGN4X	GARS
GNGT1	HMBS	OLFML2B	EIF4A2P4	ANXA1	SERPINF1	DRAXIN
IDH2	PCNA	CYP26A1	RNA5SP244	SPAG5	SCUBE2	SLC6A1
PITX1	LRRC16A	KIAA0430	OR51A6P	CDC7	EGR1	C21orf59
VNN1	MRPL15	MAOB	NOTCH2	LMNB2	TNFSF10	CENPN
YBX1	SLC37A1	RHOBTB1	RN7SL702P	GOT1	JAM2	SOX2
UHRF1	FZD5	COL6A2	FAM60BP	CDCP1	ALDH1A1	ASF1B
MMP1	LGR4	DLG5	FHP1	ARF3	C14orf132	TDRD1
ABRACL	LGMN	RGS2	TMEM60	TUBB4B	SPARCL1	CCDC64
GPR83	SMAGP	GNLY	SNORA81	MPDU1	OLFML3	ITGA1
BHLHE22	GALNT3	TUBB2A	MBOAT2	MIF	ECM1	CLIP1
RDH10	TRPM4	NCOA1	MIR4493	SAR1A	COX7A1	IPCEF1
FLJ37786	CHEK1	ADAMTS9	KRASP1	ANXA2P2	MAGED4 /// MAGED4B /// SNORA11D /// SNORA11E	MROH2A
MCM10	ANKEF1	TNC	MRPS31P4	S100A11P1 /// S100A11P1	AC012065.7	XPO5
RUVBL1	CIT /// MIR1178	FAM114A1	FAM175B	NME1	PDGFD	PAX9
FOXC1	DNAJC15	DMBT1	GCHFR	BAX	FGF13	FCRL5
TFCP2L1	DENND2D	EHD2	OR10H2	LDHA	WT1	MAPK1
SDC1	TROAP	PARVA	TOMM40	MAD2L1	CD302 /// LY75 /// LY75-CD302	MFSD6
CDC45	NCALD	HERC2	CDC14C	APOBEC3B	MYO15B	TLE6
HRK /// LOC283454	MT1F	TRAM2	PLCB3	TSTA3	DCN	ELK4
HLX	PGD	S100PBP	TBL1XR1	BLM	MME	PAFAH1B2
KCNJ2	TALDO1	HEG1	NDUFB2	RAD51AP1	PAMR1	PKMYT1
RASGRP3	F2RL1	AUTS2	MIR6737	SVIL	FOXL2	MCCC2
SPINK1	SLC25A10	COL21A1	MSRB1	PHLDA2	NDNF	TCF19
GALNT14	BIK	SPTAN1	RNA5SP385	PGK1	HTR2B	CTSS
DEFB4A /// DEFB4B	FGFR1OP	FSTL1	H2BFM	MGST2	CYR61	ITGB4
GPR158	MT1HL1	HOXA10-HOXA9 /// HOXA9 /// MIR196B	UTP6	CTSZ	ID2 /// ID2B	DOCK4
ERCC6L	TMED3	GUSB	KIAA0825	ATP1A1	PAGE4	SCO2
MAD1L1	PDXK	ATXN2	C10orf120	OBSL1	FBXO17	SLC25A2
CXCL11	CD2AP	GABRE /// MIR224 /// MIR452	SLC2A3P1	ZNF135	SLC24A3	EXOC7
PNOC	IFI44L	SLC5A3	MAGEC1	TENC1	EFEMP1	LSM5
SLC6A10P /// SLC6A10PB /// SLC6A8	MIR7703 /// PSME2	ID1	MIR4699	HOXD11	FLRT2 /// LOC100506718	FBXO21
SBK1	CBLC	C11orf95	RPL7AP72	SRSF11	P2RY14	GAMT
FABP5	WWC1	CLIP2	ZFYVE9P1	FGF2	PDZRN3	DMAP1
GJB2	CCNA2	SMARCB1	PLXNA2	C1orf21	TNXA /// TNXB	AHSA2
LOC102724257 /// TMC5	PKP3	CCL5	AKR7L	FAM184A	MMP26	KLF10
C1orf110	MALT1	TCFL5	ANKAR	CA11	CNN1	ASPRV1
PNP	MAP7	RABAC1	RPL3P9	ANXA3	MFAP4	CHKB
PROK2	PPIC	C1R	SI	CIRBP	DUSP2	CLN5
RBM34	FAM136A /// LOC100287852	DPYSL2	HNRNPRP2	ME3	ALDH1A2 /// LOC101928635	ZNF548
OIP5	C1QBP	HDAC4	BPIFB2	HYMAI	ID3	FAM124A
FAM110A	SLC25A15	MYLIP	LZTS1	ENPEP	ZFPM2	MEIS3P1
RIPPLY3	DCTPP1	KIAA1661	FAM230B	NAALAD2	FOS	THAP2
LOC100129029 /// LOC100131270	MRPL13	PRSS23	KLRC3	PKD1P1	SFRP4	ANKRD49
ZDHHC12	CYBA	HOPX	MIR708	LOC100287387	OGN	ZNF550
ERO1L	TNFRSF12A	LHFP	NGRN	ZSCAN18		CACNA1D
CD163	RAD54B	LPIN1	GRIA4	ZNF506		THBS4
SGPP2	NEDD9	ATXN1	RN7SL356P	ZNF667		TTC33
LOC100129518 /// SOD2	CSTB	MOXD1	ZNF114P1	CYP1B1		THNSL1
ANKRD22	MT1E	SOCS2	STRADBP1	TGFBR3		FKBP1B
KCNE3	PRR15L	HEPH	TTC27	CBX7		ZNF45
DMBX1	CIB1	FBLN1	TMEM217	LEFTY1 /// LEFTY2		SLC5A2
ANKRD44-IT1	MTHFD1	EGFL6	KLRD1	ST8SIA1		CDC42EP5
CCL18	GALE	MXRA7	BLOC1S2	ENPP2		PHYKPL
RIBC2	PYCARD	SLC39A6	INSR	NUDT11		RPS11
UBE2T	SLMO2	STXBP1	KLRC2	CTSF		SLC7A3
MTHFD2	HDAC5	MGP	SFMBT1	GHR		ASXL3
FAM3B	SNRK	ATF3	TAAR5	MAGEL2		MST1L
TOX2	KLHL21	PFKM	ATP6AP1	ST3GAL5		ADAMTSL3
CR1L	SNED1	BARD1	ZNF619P1	BCHE		PRORSD1P
MCM4	C8orf44-SGK3 /// SGK3	APOD	EXOC4	AF070581		PRPF40B
LOC285812	ZNF430	THBS2	ZNF92P2			CPQ
SAA2-SAA4 /// SAA4	MAMLD1	GYPC	GLP2R			FAM124B
CTHRC1	UNKL	SLC39A14	SDR42E1			ZNF891
ENO2	STAG3L3	KIAA0355	FABP12P1			HAPLN4
SEL1L3	FOXN3	DAB2 /// LOC101926921	GLRX3			ANO1
SIX1	ZNF37BP	TRANK1	MIR591			SENP6
TCN1	POGZ	SACS	MUC22			ACCS
AQP9	MCOLN3	NOL12 /// TRIOBP	DDX1			ZNF114
KIF1A	ST5	ZNF532	CASK			FAT4
GTSE1 /// TRMU	KLF11	PGBD5	CICP24			ETV5
LOX	SREK1IP1	CLEC3B /// EXOSC7	RNA5SP324			FAM175A
FAM132B	ATP8B4	AXL	CD38			GK5
LOC100506405	LOC157562	PIP5K1B	JDP2			PRRG3
ULBP2	ITPKB	WFS1	BLOC1S6			FCHSD1
2020-03-01	MECP2	LGALS1	TBCAP2			COMMD6
CSTA	RNF38	NID1	EPG5			IKZF5
LINC00550	ZNF426	LAMC3	ESYT1			ITGBL1
GTSE1	AP1S2	NES	UBE2V1P6			ZNF658
LOC285957	ZNF248	TIE1	ZSCAN29			MTMR9LP
GPR84	RP11-395B7.7	BASP1	CKMT1A			STEAP2
PPP1R14A	PPIEL	VASH1	CHRNA2			HHIP
NEK10	ZNF394	PGRMC1	RPL17P11			FBXL7
COBLL1	ZNF665	EDNRA	EIF5A2P1			CBFA2T3
LOC145474	CSDC2	TUBB6	PABPC1P5			TSC22D1
MUC5AC	APBB1	RASL11B	RFC3			ZNF76
C1orf116	CMAHP	EMP3	XPOTP1			CCDC24
GZMB	NINL	HSD11B2	C6orf222			ADRA2C
PLEKHS1	LRRC37A3	RAI14	PSMB3P2			EFEMP2
HNRNPAB	ACTG1P4 /// AMY1A /// AMY1B /// AMY1C /// AMY2A /// AMY2B	NPR2	TDRD15			CELF5
IGKV1OR2-108 /// IGKV1OR2-108	TRPC4	COL6A3	METTL4			BBS10
HK3	TMOD1	PDCD6	AGGF1P1			SGIP1
CDCA5	CDIP1	SLC26A10	GNRHR			SERP2
HHIPL1	FLCN	AK021537	RN7SKP222			MEOX2
ANKRD2	ATG14	EFHD1	DUTP1			JAZF1
SLAMF7	PTPRR	WNT5A	ATP5H			NDP
GLYATL2	RPS6KA2	FGF9	MRPL55			ENPP1
SKA3	LAMA4	SERPINH1	PPIAP20			FCRLB
ARNTL2	UBXN7	FHOD3	HRASLS			DCT
LPCAT1	COPG2IT1	PDLIM2	NLRX1			SOX7
KIFC1	CCDC101	RBP1	BANCR			TLE2
PLK4	STARD13	NREP	MIR543			TMEM170B
SLC6A8	C2orf68	GPX7	CHP2			B3GAT1
BC113958	MLF1	SEMA5A	PTCHD3P2			PRTFDC1
LRP2	KIAA1462	NXN	SMYD3			SDPR
GPSM2	PGM5	RASSF2	RN7SL154P			GRAMD1C
PTPN12	RUNX1T1	CPZ /// GPR78	CD83			CYP46A1
POLQ	LOC101929910 /// LOC613037 /// NPIPA5 /// NPIPB3 /// NPIPB4 /// NPIPB5	MFAP2	GNPTG			HNMT
RELT	DENND2A	PCDHGA1 /// PCDHGA10 /// PCDHGA11 /// PCDHGA12 /// PCDHGA2 /// PCDHGA3 /// PCDHGA4 /// PCDHGA5 /// PCDHGA6 /// PCDHGA7 /// PCDHGA8 /// PCDHGA9 /// PCDHGB1 /// PCDHGB2 /// PCDHGB3 /// PCDHGB4 /// PCDHGB5 /// PCDHGB6 /// PCDHGB7 /// PCDHGC3 /// PCDHGC4 /// PCDHGC5	CHRNB1			TSHZ3
YKT6	KDR	HOXA5	SMARCD2			SLC1A1
GFRA3	SETMAR	GABARAPL1 /// GABARAPL3	CTIF			C9orf72
BAIAP2L1	PDE8B	MLLT11	RNA5SP173			GAL3ST1
STC2	SOWAHC	RGS4	MED8			NAT6
ANP32A-IT1	NEDD4	HSPA2	CLEC4G			HEY2
ANKLE1	CLCF1	TAGLN	CASP9			SLC13A5
LOC101928516	LIAS	MYLK	RN7SL482P			NBL1
FCGR1A /// FCGR1B /// FCGR1C	LINC00260	COL3A1	TEX101			NTN5
LOC285556	GUSBP3 /// SMA4 /// SMA5	IGFBP4	NPM1P50			KIF12
C1orf43	NR2F2	C1S	TPRXL			KLHL31
LINC00858		DFNA5	EIF4BP9			ACOX2
EPT1		PPAP2A	CASP6			WDR86
TTC6		ABL1	MAMDC4			PRKD1
HIST1H3A /// HIST1H3B /// HIST1H3C /// HIST1H3D /// HIST1H3E /// HIST1H3F /// HIST1H3G /// HIST1H3H /// HIST1H3I /// HIST1H3J		SPARC	CNP			NAP1L2
SERPINB5		MICAL1	SNORA16A			LCAT
HIST1H4H		TMEM120B	POLR2B			CA3
FANCI		LOC100130872 /// SPON2	YWHAZP8			FLRT1
OAS1		SOBP	ECE1			PHF21B
IL21R		GJA1	SCIMP			RERGL
KRT6B		HBA1 /// HBA2	RN7SKP221			DCAF12L1
PIK3R3		NR2F1	B3GNT8			SIAH3
SYNGR3		ZCCHC24	FAM65B			NT5E
ENC1		SNCAIP	RAB1A			ACSL5
HECW2		CDH11	MRPS21			RASD1
NGFR		ZNF516	RNA5SP132			MUM1L1
TICRR		DDR2	MAVS			ZMAT1
F12		DNM1	HPS5			WBP2NL
CDC6		COL5A2	FXR1			CHRDL1
IGH /// IGHA1 /// IGHA2 /// IGHG1 /// IGHG2 /// IGHG3 /// IGHM /// IGHV4-31 /// LOC102725526		SNAI2	MIR4799			RORB
SLC7A11		PXDN	PCBP4			CLDN8
NCF2		PLAT	MTND1P14
APOE		COL7A1	MIR6131
RNASE1		TMEM45A	ATP1B1P1
CCNE1		MYL9	MIR5100
AKAP2 /// PALM2-AKAP2		CD248	ANKDD1B
PSENEN		KMO	RTN1
CD82		RFTN1	PARS2
KCNJ15		MMP11	PRNT
HSP90B1		CRISPLD2	HSD17B1
C16orf59		PCOLCE	POM121B
ZBTB7C		F13A1	ZNF785
PIF1		SCG5	ORAOV1
MAP7D2		IGF1	SPRR2G
LINC00839		PENK	OSGEPL1
GRHL3		ISLR	NPM1P11
HILPDA			DCTD
CORO1C			KRT18P27
PF4V1			ATP5G1P1
CENPW			TNRC6A
SHISA9			TIMP4
PRPF31			ZNF43
SCD			PI15
SLC52A2			FAR1
FLJ36848			RN7SKP211
KLHL23			KIAA2013
FCGR1B			RNA5SP504
GGCT			ENPP7P12
SLC2A6			SLC7A5P2
STIL			DUSP8P5
CDC25B			DHODH
SLC8A1-AS1			CITED4
LOC100289092			EIF2AK2
IL13RA1			UBE4A
VDR			CNOT11
PFKP			PLA2G4F
ESCO2			RNY3P3
AX747730			TCHHL1
ALYREF			THRAP3P1
ALOX15			SYN2
NAV1			FAM107B
NCAPG2			CCDC68
F11R			MIR340
VNN3			FCGR2A
TGM3			ZNF880
LOC100506459			TPRG1
FAM46B			RNA5SP491
SPIRE1			AKAP1
HSPB1			PGAM1P12
CKAP2 /// DKFZp667J0810 /// IGLC1 /// IGLJ2 /// IGLJ2 /// IGLJ3 /// IGLJ3 /// IGLJ3 /// IGLV1-36 /// IGLV1-36 /// IGLV1-44 /// IGLV1-50 /// IGLV1-50 /// IGLV@			CXXC1P1
YWHAZ			DCAF4
RP3-522P13.2			ABCB11
SLC12A2			OR1L1
C12orf55			FAM179A
DSP			SNORD46
ARPC1B			IL23A
COL4A1			RNY4P30
RNASE6			FAM166A
FAM111B			EPHB1
PLEKHB2			C8orf59
AGO2			EIF2D
EPHA4			KPNA6
SLAMF8			WBP2P1
SNTB1			RPL21P1
GPR110			CLIC3
ATP6V0A4			BNIP3P11
DERL1			RNA5SP442
GPR26			KRT19P1
HSP90AB1			ROCK1P1
MIR6787 /// SLC16A3			WLS
SMARCA4			GUSBP9
PSMC3			SLCO2A1
LILRB2			C12orf49
LACTB			GSS
UBE3C			SNORD48
AIFM1			SNORD45B
FXYD4			JSRP1
ARHGAP11B /// LOC100288637			SPTA1
IL12B			RARS2
AB074162 /// MIR181A2HG			GRTP1
SUZ12			C1orf127
ME2			SNORD105B
IGK /// IGKC			SH2D6
SLC27A2			EFHC2
TRNP1			MFSD4
SYAP1			CAV1
CHRM3-AS2			AGFG1
F2RL2			GAPDHP46
ELOF1			TMPRSS11CP
C8orf34			DNASE1L3
NPL			FAM163B
MIR3185 /// PRAC2			AK4P3
FANCB			USP9YP6
IL10			GLOD4
RGS16			BTN3A3
PTMAP1 /// PTMAP1			KCNJ10
LAPTM5			RPL5P8
TUBB3			RN7SL456P
RAD51			RNA5SP72
PTPRC			CADPS2
HFE2			WSCD1
ERBB4			RARS
SPDYA			MIR628
RP4-539M6.21			NLN
P4HB			MIR5692B
HAGLROS			ZNF736P6Y
TNFAIP6			ARL9
PAPSS2			FABP3P2
MS4A4A			EIF4A2P2
HIST1H3G			COL8A2
MSN			ACTG1P3
TET2			AVPR1A
PTBP3			PPIAP7
PLP2			KCNK10
G3BP2			MIR6873
KLF16			HSD17B7P1
C15orf48			HERC5
HCAR3			DHFRP1
SH3BGRL3			CMSS1
BGN			TGFB3
IL18			AKAP8P1
C15orf62			GTF2IP2
NEIL3			MIR4466
ANGPT2			DUS2
NEURL1B			SLC25A12
MYO3B			TEF
UGGT1			MIR550A2
C14orf39			MYEOV2
AMMECR1			TTLL4
PCDH17			GOLGA1
E2F3			ARSE
RP11-339A11.2			GEMIN8P4
2020-09-09			ACRC
TC2N			RNA5SP35
R3HDM4			KRT18P66
SLC26A9			SPATA31A5
KRTAP11-1			DRD5
NUDT1			BTBD17
PSAT1			PSKH2
SLC5A12			ZBED2
IGF2R			RN7SKP133
CCDC3			CPNE9
DHFR			TRIM59
NCF1 /// NCF1B /// NCF1C			CYP2D7
EGLN1			MFSD3
IGLC1 /// IGLJ3 /// IGLV2-14 /// IGLV@			ZNF143
AP1M2			MURC
CD86			TMEM185B
AKT1			C17orf59
IGLV4-60 /// IGLV4-60			HIVEP1
GLULP4 /// GLULP4			MIR199A1
LIPA /// LOC101926887			HNRNPDL
SLC7A6			ANKRD33B
EMB			NSMAF
TMCO3			LAS1L
CLTC-IT1			UBTD1
OR51E1			MIR519D
TP53BP2			MIR4487
LOC100506071			PCDHGA4
DNM2			ASRGL1
VEGFA			EPHB4
C3orf52			SLC39A3
TDO2			GAPVD1
PYGB			SECISBP2
OR5G1P /// OR5G1P			GTSF1
ALDOA			KHK
CD44			ZFP37
SELL			THTPA
AF279780			THEMIS3P
CCDC144CP			C5orf47
GCM1			OMG
SYTL3			MYZAP
F5			TAS2R7
TUBB			AVIL
TNFAIP8L1			FAM78A
SLC38A11			DUX4L22
ABCC4			MIR1538
AL022344.5			C11orf70
MOB1A			ARL5B
LOC644852			CTSLP7
KLHDC7A			ZNF232
TNFRSF21			RNA5SP306
WDR92			DPF2
CD1A			GNL3L
WFDC3			MIR1249
CTA-331P3.1			TNIP2
ORC6			GET4
HNRNPUL2 /// HNRNPUL2-BSCL2			FAM84B
CSF2RB			PRDM8
ARPC5			RN7SKP92
TPM4			C1GALT1
MYO1B			PCBD2
CCDC186			RPF1
PCAT6			PDK2
CALY			C8orf31
SLC27A4			AKR1B1P6
BPNT1			SEC63P1
TIMM23 /// TIMM23B			EPHA5
SPAG1			USP47
LOC100505841			THAP1
HCLS1			RSL24D1P5
PDK3			PSORS1C1
LRRC20			IQGAP1
GJA5			CFHR2
SLC2A1			ZNF343
LOC148709			TLK1
KAL1			IL1RAPL1
C6orf106			NLRP8
RP11-215E13.2			MIR412
HMGA1			MIR204
EIF4G1			AGKP1
DYSF			CHRAC1
CCNJ			TRIM34
CHD4			MYO1F
HIST1H2BJ			CCL8
P2RX3			ISG20
KCNK2			FAM90A2P
PCGF5			LIPT1P1
RRAGD			MIR644A
SRGAP1			BIRC8
GLRX			EFCAB5
QSOX1			SPACA4
PHLDA1			HORMAD2
LOC101928687			RPS19P3
FAM64A			SNORD90
EFNB1			TSR1
KRT24			TCEB3B
MROH1			XYLT2
CHEK2			TRUB2
SLC1A5			RN7SKP94
SMAP2			GOLGA4
IGHA1 /// IGHG1 /// IGHM /// IGHV3-23 /// IGHV4-31			MIR4694
IGHA1 /// IGHD /// IGHG1 /// IGHG3 /// IGHM /// IGHV4-31			BST2
MAP1B			SV2B
LOC286058			OR7E163P
MGC10814			CDH12P3
MAT1A			TSPAN8
SLC4A11			CCR8
APOL1			PRSS54
SIX4			GGT1
AKIRIN1			SCGB2A2
LOC100130654			BRSK1
CCDC6			ZBTB33
RP11-1L12.3			DYM
AK097242 /// CTB-127C13.1			NARSP2
LPIN3			RPL37P3
FCN3			CEP57L1
POC1A			C14orf105
TFAP2A			C7orf66
ARPC3			DUSP5P1
BCAP31			RN7SL357P
SAE1			FAM183B
FAM83A			HTATSF1P2
HSPH1			BCAT2
LINC01257 /// LOC101929974			CRK
LINC00867			DHX38
UQCRC1			PHBP5
TLCD2			PHF10
FOXL1			MCM2
LOC100505570			WFDC10B
SP8			TMED10P2
HSPA6			COL22A1
C4orf48			SPATA18
HIST1H3I			PLET1
PF4			CARM1
PPIB			KCNT1
CEBPG			A2MP1
RHOH			CHCHD2P4
LRFN4			POU3F4
SUN3			NCF4
STIP1			WTAP
HOXB13			LSG1
FAM188B /// INMT /// INMT-FAM188B			KATNBL1P2
EP300-AS1			BCRP2
SYNCRIP			SLC39A10
LOC101930324 /// NSF			CFAP58
CAST			BEND2
KIF17			PDLIM4
IGHA1 /// IGHA2 /// IGHG1 /// IGHG3 /// IGHM /// IGHV3-23 /// IGHV4-31			AKAP5
DNAJC3			MIR382
EIF4G3			NRBF2
LFNG			TBC1D3D
PIP5K1A			PRAMEF14
ZMYND11			OR2W4P
RP5-894A10.6			SLC22A8
EZH2			RN7SL282P
DNAJB6			SNORA11D
ZNF341			ACO1
AC010145.3 /// MYCNUN			AP5Z1
ATP6V0D1			TMEM261
ABCA1			FANCD2OS
RMI2			DEFB105B
GJA9 /// GJA9-MYCBP /// MYCBP			ZBTB21
FKBP5			VGF
CHRNA1			RPS15P9
SAA3P			RNA5SP266
KRT25			PNPLA4
PTGES3L			VCAM1
DUSP10			TRAJ19
POLR3H			COX4I2
TMPO			ZNF877P
AC004951.6 /// AX747182			UBE2A
LAMB4			SUCLG2P4
ECHDC1			NDUFS5P1
MTFR2			MAP3K5
HIPK1			CA1
SH3GLB1			WARS2P1
SPANXB1			RNA5SP119
TRPV4			LSM3P3
FAM178B			S100G
PSMD1			RNASEH2B
RHBDL2			NKAIN4
CDYL			SRP72P2
STAT1			MIR3928
RP11-932O9.10			HCG4P8
LOC102725271 /// NTM			GCDH
TCR-alpha /// TRAV12-3 /// TRAV12-3 /// YME1L1			TUBB1
CSPG5			ZNF688
EXOC6			NRADDP
LOC101927886			WFDC8
GCH1			PCDHB17P
RAB35			SLC9A1
RASSF6			RPL12P15
SHMT2			CEACAM4
EIF2AK1			ACOT12
AURKB			ICA1L
OAS2			NAMPTP1
TKT			SNORD118
ATAD2			CACNA1C
OAZ3			MAP3K9
NAV2			HS3ST4
HMOX1			MIR3619
NDRG1			C1orf52
MZB1			CYP4A22
DOPEY2			C1orf101
XPNPEP1			SYT3
CRELD2			H3F3BP1
ADAMTS15			CDH23
GRIK3			RNA5SP291
BC034319 /// RP11-11N9.4			RPL13AP3
BRCA2			NMD3
HLA-B			EIF4A3
ST3GAL1			MTND6P20
RP1-31B8.1			PCDHGC5
SMC5-AS1			MTCO2P4
EPPK1			KALRN
ACP1			MIR514A3
SLC25A16			GTF3C4
TAF6L			KRT71
IL4R			VHLL
PRCC			KLHL12
SOX4			TMEM38B
ESRRG			RPS12P27
RAPH1			SH3KBP1
STC1			MTND1P3
SLC36A1			GPR1
MYB			AADACL2
IBSP			NR5A2
PHTF1			DOLK
KIF21B			CASZ1
NEURL3			EFTUD1P1
CCNJL			CYP4Z1
ADIG			RN7SKP268
MIR4435-1HG			GCNT6
PFN1			MRPL10
LINC00483			GPR35
ABHD17C			MED18
LMNTD1			EIF3LP2
FCGR3B			CDY5P
ATL2			AWAT1
BC130595			SNORD5
AX746823			IRAK3
HOXD3 /// HOXD4 /// LOC401021			CCDC144A
PPM1G			GPR153
WBSCR22			MIR452
CORO2A			MRPS17P3
SMS			HNRNPCP3
TLCD1			PLXDC1
MARCKSL1			UCP2
RP3-406P24.1			MTND2P25
ACACA			LYL1
GTF2H2 /// GTF2H2B /// GTF2H2C			GDPGP1
LOC641515			RPL7AP64
AIM1L			ZNF649
RFWD3			IL1R2
MAPK13			TMEM41A
MIS18BP1			OR4C3
PLTP			C16orf52
RP11-757F18.5			PLAC1
DDX3X			TRAV5
ST8SIA4			HSPE1P24
CASC5			MIR614
PAICS			SNX27
TMPRSS2			RFC1
MIAT			NAV3
RNASEH1			MIR6851
CDT1			MIR4734
ZNF367			CKMT2
AICDA			SNORA46
CENPK			RN7SL229P
HEATR3			SLC9A9
ATL3			CASP1
LEMD2			RPF2P2
LPP			TCF3
IARS2			YIPF4
UBASH3B			SNAPC2
RP11-295G20.2			ERAS
LYN			GAPDHP36
CCNF			TIMM13
CCDC88C			VCPKMT
EFCAB4A			HAGHL
BC045779			INO80
TAS2R41			HSD3B1
TBC1D29			LDLRAP1
ANP32E			ASS1P9
TSPAN17			RN7SL508P
ST8SIA5			BAK1P1
FAM162A			NUP210L
TIMELESS			GYLTL1B
EAF1			TCEB1P8
SAPCD2			RPL35P3
BRAF /// KIAA1549			TRAPPC6B
ASAP1			ACPT
B3GNT3			MYL7
CDC27			RPL12L3
MAN2B1			SCAMP3
RAC2			ZNF575
RP11-554D14.1			RNA5SP447
SLCO5A1			KATNAL1
ADAT3 /// SCAMP4			MTRNR2L7
STON2			ITIH4
FOXRED2			MED24
SNX10			SLC14A1
NETO2			RPS24P1
PSMB9			ULK4
AK4 /// LOC100507855			LYVE1
RBM15			AMD1P1
PSMA7			CNTLN
PDAP1			CCDC175
LSM4			RPL5P3
APOC1			KIF20B
LOC101929144			PDE11A
COX2			HIST1H3E
CAPN8			RNA5SP61
ZWILCH			HOXC5
PELO			FDPSP1
EFHD2			MARK3
METTL2A /// METTL2B			C11orf74
CD79B			IL2
ACTR2			SNORD32B
FYB			FMN1
FN1			RPS28P8
TUSC7			NT5C
CR1 /// CR1L			NDUFB6
TYMP			KRT8P12
PRKAG1			C1orf131
LY9			SKP1
SURF4			PTF1A
UPP1			CACTIN
SLCO2B1			CYCSP10
HAUS7 /// TREX2			SNORD55
BLCAP			RN7SKP1
FCRL3			OR8L1P
LARP4			MRPS5P4
UCP1			NUPL2
RCC2			RNA5SP472
ADAM10			RPS26P6
TBX15			SESN2
BNIP3			ST13P11
SLC41A2			CRAMP1L
LIPH			RPS11P7
RANBP9			CNN2P7
AGO2 /// CASC7 /// CASC7 /// DQ574852			TNFSF18
LINC01149			PIWIL2
CCT5			LDHBP3
FAM222B			SLC16A5
PDK1			FAM129A
RAB3D			PKD1L2
SSU72P8 /// SSU72P8			MFSD9
HIPK2			CBR4
C1QB			TPD52L2
MCHR2			TCEB1P14
KIAA0922			PPP1R2P4
CHURC1-FNTB /// FNTB			FAM26D
CDK7			BCL11B
PLAU			RPS2P39
AC004941.5			MTND2P8
DLAT			OR6N2
RAB3B			ALDH9A1
AFF2			RAPSN
KIF19			KIAA1429
PDIA6			ZNF699
BSG			KCTD9P4
CD93			RPL17P51
PDIA4			HSFY5P
KYNU			MKRN4P
AUNIP			OR1F12
CD55			TOPAZ1
SPDYE2			MIR3164
NUP62			CYP3A54P
PRSS3			RPL12P38
ARL8A			KRT18P55
FLT1			CTBP2P7
APAF1			AGO3
CYBB			VGLL3
CENPM			OR1A2
PRAME			GNA14
ZC3H12D			DHX36
SCRN1			MIR4801
FUT3			TCEB1P30
SLC4A4			SHE
RPL39L			PIAS2
GAS2L3			MIR5582
E2F1			RBP3
SAMHD1			SS18L2P2
PRR5L			TOR3A
BC005081 /// RP11-284F21.10			RNA5SP523
GNPDA2			FOXD3
CHRD			RNU6ATAC41P
CCDC184			TAS2R30
NUDT6			SCGB2B3P
BC070363 /// RP11-108M9.4			MBLAC1
PRND			EIF5P1
LOC100506302			DUXAP4
SPTLC3			SEC16A
TSHZ1			ZNF644
CRIM1 /// LOC101929500			MYH10
TTC14			SPACA5B
ZDHHC17			MCTS1
EIF1B			FBXO7
NDST2			LGALS9
ZXDA			NCEH1
IL17RB			SNORA9
UBE2Q2L			SYTL1
DAB1			RPS3AP39
AGER			RNA5SP413
C5			RN7SL145P
DTWD1			TSPY5P
ZEB1-AS1			RN7SL47P
LOC101928954			EPS15
EXD2			MRRFP1
RGAG4			FASTKD5
IL1R1			CDK2AP2P3
RBM4			OTUD7A
LETMD1			OR6M1
GABPB1-AS1			NFAM1
UXT			FAM207CP
SENP7			PCBP2
LEMD1-AS1			OR6C76
KANSL1-AS1			GLULP6
MBLAC2			TSPAN16
ZMYM6 /// ZMYM6NB			TGIF1
FAHD2CP			MIR7160
SMPDL3A			RPL35P9
ANKRD23			TRAJ27
RPL31 /// TBC1D8			PIWIL3
GS1-111G14.1			CCDC102B
MAT2A			ZMYM2
ENGASE			IL5RA
ETAA1			SRRT
FUT9			PSMB10
SLC6A3			FBXO45
NPHP3			RNA5SP20
JMJD1C-AS1			SLC17A1
CXXC4			TNFRSF11A
MSS51			SLC12A8
LRP5L			NUDCD2
SMYD5			SNX14
ITFG2 /// LOC100507424			TRAJ13
ZNF177 /// ZNF559-ZNF177			AGBL2
IGDCC4			PACRG
FAM69C			HTR3B
GIPC2			SRP68
LIPE-AS1			PCDHA13
PTGR2			GOLGA6L6
RP11-362K14.6			SNX13
RPL35			CAMK1D
ZNF441			MEGF11
GCLC			OR4P1P
GAS5 /// SNORD44 /// SNORD47 /// SNORD74 /// SNORD76 /// SNORD77 /// SNORD79 /// SNORD80 /// SNORD81			LPHN1
LHFPL3-AS2			TPMTP2
ZNF564			ADORA2A
LOC101929112			CYCSP43
LOC101929248			AVPR1B
PRPF4B			EZH2P1
CEP44			ASIC2
RP4-758J24.5			CER1
EPB41L4A-AS2			NENFP1
RP11-112J3.16			TERF1P5
MIR6840 /// PILRB /// STAG3L5P-PVRIG2P-PILRB			CCDC65
FAM13A-AS1			CTSO
LOC100132356			KLF2P3
VEGFC			TMEM235
APH1B			NDUFB11
RAB9B			HCP5
NSUN5P1 /// NSUN5P2			TRAJ24
OXR1			LHB
RERG			MIR622
MTMR10			RHOG
CBX3P2			CCNJP1
HSD17B11			MIR4711
COL5A3			TMEM115
CNTN1			NTM
KANSL1L			RN7SL623P
NUDT12			ZNF124
RBPMS			CCDC107
PLCG1-AS1			HS3ST1
CTA-29F11.1			RPL30P7
UQCC1			RPL35AP22
ARSG			ACTG1P11
RP11-468E2.5			IFNGR1
ACD			SLC25A30
RP1-286D6.5			ZC3HAV1L
NRDE2			ARSDP1
LOC101928725			CHID1
SEMA6A			GAPDHP29
N4BP2L2			HIST1H3PS1
LOC100630918			ALB
CACHD1			ZNF885P
LOC100288778 /// LOC101930154 /// LOC102723897 /// MIR6859-1 /// MIR6859-2 /// WASH1 /// WASH2P /// WASH3P /// WASH7P			ZNF402P
LOC101928487			MIR4271
LINC00173			TMEM39B
HECA			RPS10P2
ZNF273			ELOVL4
LOC102724275			PRY2
GPALPP1			DNMT1
GDPD3			GLI4
KB-431C1.4			NPIPA5
RP11-631N16.2			ADAMTS10
CLCNKA /// CLCNKB			OR2G1P
MAN1A1			EXTL1
VPS36			MATK
CPEB1			C2orf43
SNHG22			HSPA1A
LINC01341			RN7SL387P
SH2B1			GAPDHP57
DQ586822			LY6H
MAGED2			SHB
SP4			C8orf74
ANKRD46			FAM225A
DOCK9-AS2			RIPPLY1
ZSCAN30			DOCK3
DHRS4-AS1			CCT6P1
LOC100506325			MIR4664
ITGA10			GHSR
MED30			ADAM1B
CPAMD8			C1QTNF6
IQCH-AS1			LRRC37A13P
GALNT4 /// POC1B-GALNT4			MAGEB17
EXOSC8			LDHAL6B
RNPC3			SNORA11
KCNMB2			MIR421
TNFSF12 /// TNFSF12-TNFSF13			RN7SL105P
TRMT13			MRPL4
LRRCC1			MUS81
SCOC-AS1			HSD3BP2
RPL7AP71 /// RPL7AP71			RNY3P9
GPR160			DBNL
PAIP2B			SERPINI1
TMEM221			ENOX2
LOC285074 /// LOC730268			POTEH
LOC101929886 /// PGM5-AS1			CD320
ABCC8			NAPSA
RBFADN			RNY4P10
LOC101927365			IFNWP19
RP11-391M1.4			TSPY2
GUSBP5			MEST
LENG8			KRT18P21
TMEM192 /// ZNF320			MTND1P32
TUSC3			IL34
LINC00092			RPS20P24
ERRFI1			ACTG1P4
LINC00515			DAPP1
LOC101928545			FAM120AOS
RNF150			MIR589
CLEC4M			APOBEC3H
RP11-554J4.1			CREBRF
TMEM64			LLPHP2
NUDT7			TSTD2
LINC00910			GUSBP6
ZNF252P-AS1			KCNJ16
MIATNB			MTCYBP4
LETM2			GRAMD4P8
RBPMS-AS1			ITGB1BP2
ZC3H12B			CCDC97
TIGD6			CYP4A11
ARHGEF10			AOAH
FDXACB1			CBX3P1
FAM223A /// FAM223B			ARSFP1
ZSCAN26			KLF1
BBS4			BECN1P1
PLCD1			POU3F3
LOC283887			MTND2P9
CCDC142			RORA
OGT			AIMP1P1
JADE2			EIF2S2
LOC100505564			SCG2
MIB2			BRCA1
MSANTD3-TMEFF1 /// TMEFF1			PAPOLG
REM2			RALGAPA1P
TIPARP			UPF3A
LOC101927608			LRFN3
NPDC1			UBE2CP3
LYRM9			ENPP3
FLJ46875			LURAP1L
FBXL15			STXBP3
CCDC8			DUTP5
IGSF22			OR11H12
SLC16A1			FAM63A
LOC102723845			DNAJC16
ZNF485			FGF14
A2M-AS1			ANKRD36
RP6-99M1.2			CNGA1
METTL3			KMT2D
KCNN2			IGJ
LOC101927609			HSPA8P14
LINC00969 /// SDHAP1 /// SDHAP2			PPP1R12BP1
C14orf28			MIR6824
LOC101930059 /// LOC102724250 /// NBPF1 /// NBPF11 /// NBPF15			RALYL
DKFZp564H213			CAPN3
RNF139-AS1			FECH
NOTCH2NL			SLC22A7
COX10-AS1			PSMB6
LIN7B			CCNI2
DACH1			PARP16
DFFB			FBXW9
RSL24D1			RNH1
BTC			RNA5SP183
C8orf46			STARD4
CPLX1			CLDN11
MIR5193 /// UBA7			RPL26P34
ST7-AS1			AIG1
FAM50B			SYMPK
MIR6516 /// SCARNA16 /// SNHG20			HMGB1P42
RASSF8-AS1			MIR378I
GNAO1			RN7SKP110
SPICE1			FAM110D
HLA-F-AS1			ALMS1P
ZNF835			WDR61
REM1			TAS2R20
ZNF703			TMEM75
RUNDC3B			NAA60
NTRK3			SERPINB7
LOC101928424			RN7SKP63
HERPUD1			MIR19A
C3orf18			ATP5S
RAPGEF4			PCSK9
SLC45A1			FLNB
LOC101927824			GPRIN2
LOC101929072 /// LOC285835			KRT73
EIF4A2			ITGAD
MBIP			MIR6827
LINC00908			NRXN1
LOC100506834			TBL1X
ECHDC2			NPAP1P2
NRK			PRAMEF6
PFDN5			RIMS1
CRNDE			PAUPAR
SNX21			FAM96AP1
ZBED8			UGT1A2P
EPHB6			MIR548H2
ZNF559			RPL7AP38
NSUN7			DSTN
ZNF33B /// ZNF33B			OR52B3P
CGNL1 /// LOC101930344 /// LOC101930349			ACSM5
P2RX7			PPFIBP2
TPTEP1			RNA5SP308
HAL			BCL2
LOC102725017			UHMK1
RASGRF2			CYCSP35
RP11-73K9.2			PPP1R7
DPH7			FANCD2
PPP1R3E			RAB11FIP3
LOC200772			SYTL4
LOC102724537			ILKAP
ZDHHC2			MIR8056
RP11-700J17.2			TBR1
RAD51-AS1			SREBF1
ARHGEF28			NLRP7
RARA-AS1			FTH1P6
MROH8			SERHL2
C15orf56			PAPSS1
ANKRA2			MPPED2
SEC62			RN7SL630P
RP11-589P10.5			PTPRK
AK091028 /// GMDS-AS1			LRIT3
LOC100507547 /// PRRT1			BCAN
MANEAL			LIPF
LOC100128239			DNAH10
DPH1 /// OVCA2			ST7L
USHBP1			DNAJC28
ZNF781			RNA5SP511
SLC16A4			EIF4A3P1
TOLLIP-AS1			COX8A
INTU			ETS2
FREM1			FAM99A
NR1D1 /// THRA			CCDC71L
PLEKHH2			JMJD7
D2HGDH			UFSP2
HSPB2			GGCX
MYT1			CYLC1
CTA-445C9.15			IGHG1
GNG7			HMGN1P10
LINC00926			DPEP2
ZNF321P /// ZNF816-ZNF321P			RN7SL100P
TMOD2			RNA5SP493
LOC101928403			IQCB2P
DNAJC27-AS1			NT5DC4
LRRC75B			LAGE3
UBE2U			FGF18
PDCD4-AS1			VPS4B
SOX17			CDC34
AK023627 /// TCTE3			IGFN1
IGDCC3			FUBP3
ATG4C			KIR2DP1
SH3BP5-AS1			RRS1
LOC100996457			BPIFB4
SFXN2			ZNF222
PRRT2			RN7SL863P
AX746627			PROX2
PRICKLE2			OR10Z1
ID2			PCNPP3
RAB33B			AEN
CDK10			MIR4745
LOC101928230			FDPSP5
TTC18			NRAP
LINC01101			STK26
LOC100505938			MKNK2P1
FAM218A			RN7SKP130
RPL34			OR14A2
ATP1B2			MAMSTR
SYNPO2			SETP3
C10orf32			MAGOH3P
ZFP92			AKAP12
LOC100287525			B3GNTL1P2
LOC100506469			RAB5A
TCEAL1			FAT1
GATA6			C3orf79
LOC101927943			TRAJ31
CSMD3			POLR2A
MGARP			MIR3920
PPFIA2			NOL4
LCA5			RPS4XP1
LOC155060 /// ZNF783			CEPT1
LINC00936			OR12D1
TNNI3K			C19orf24
PHYHIP			PATE1
AC091633.3			ULK4P2
LINC00639			TCEB1P12
LINC01424			SGK3
LOC100506990			CYP7A1
PDE2A			FNBP1L
C16orf3			OR2W2P
KDSR			RN7SKP22
SALL1			MFN2
CTD-3025N20.3			OR7E162P
SLC5A9			PHBP10
LRRC14			FBN3
MON2			TCF24
IL6			SGOL1P1
PDE6B			ACAD9
KLF2			SLC25A24P2
WDR37			SEC14L6
ZNF442			FAM46D
TMEM245			MIR6854
SPG20			DNA2
HACE1			REC8
GS1-166A23.2			SNORD24
RP11-301O19.1			DPY30
RP11-819C21.1			TRPT1
GLIDR			RPS26P30
ZEB2			RN7SL187P
LOC728743 /// ZNF775			C1orf106
MIR4458 /// MIR4458HG			VTA1
GSTM1			GJD4
LOC100129098			C4BPAP2
GDAP1			MIR424
TSC22D1-AS1			GAB1
TMEM91			PALLD
TBC1D32			MIR4744
YPEL3			RPL34P22
LOC102724356			KIRREL2
FAM101A /// ZNF664-FAM101A			MIR4655
CTD-3092A11.2			TRAPPC2P2
EPB41L4A-AS1			SNORA7B
CCDC85A			KNTC1
FRG1 /// FRG1B /// LOC100134091 /// LOC100289097 /// LOC101930278 /// LOC101930531 /// LOC102724923			CLNS1AP1
KLHDC2			ITFG1
GJA4			RPS2P45
TRAPPC2L			GABRG3
TCF21			POLDIP2
CTD-2292M16.8			ZBTB45P1
ECHDC3			NCLP2
SIDT2			EFTUD2
CEACAM21			UBE2CP2
TMEM243			RN7SKP135
TBC1D10C			SPDYE8P
LOC101928560			ELOVL3
FLJ37453			RPL17P43
MAP3K1			PODXL2
ALG13			MIR3155A
ZNF253			SLC36A2
LINC00115			HPRTP4
TWIST1			DOC2GP
LOC101929465			SH3BP5
ZNF34			ARL2BPP3
ZNF626			TXN
LOC101928968			LMO2
ABCC5			TSPAN14
TRAF3IP2			OR7A5
TMEM220			OR1P1
AX747750 /// RP11-532F6.3			NECAB3
CD160			USP19
LOC257396			HNRNPA1P23
CCDC158			AQR
LOC100506098			RAD50
FAM24B			RPL15P20
HHIP-AS1			IL1RL1
KIZ			CALCR
AP001462.6			MED19
PHYHD1			COX7A2P1
RP11-552M11.8			MID1IP1
PLA2G6			ELK2AP
ADCY10P1			APOOP2
P2RY1			YWHAQP9
MUM1			SNRPGP19
LOC100147773			PTPRQ
CLMP			NME9
FAM188A			TSR3
CASP12			RPL23AP68
SNHG19			WDR83OS
MUTYH			UGT2B7
PRKAR2B			PPIAP23
NDST2 /// ZSWIM8-AS1			NANOGNB
LINC01023			OTOG
FLJ35700			RN7SKP128
ADAM32			RBMY3AP
RP11-1275H24.2			HSPE1P28
FGFBP3			LIMS1
COBL			FAM110C
MEIS3			RPA2P1
GATA5			DUXAP2
C7orf31			RN7SL170P
FBXL3			HSPB3
RP11-635N19.1			MIR663A
C8orf82			WRBP1
BTBD18			NANOGP11
LPCAT2			RBBP8NL
TMEM47			FARSB
RDH5			ANKRD20A5P
DFNB59			LMF1
LRCH2			KDM4E
PAXIP1-AS1			STXBP2
ZNF324			ALDOAP1
LINC00909			WASH1
RP11-5C23.1			SEZ6L
SPX			NAA15
CNBD2			OR10D5P
TMEM27			KAT6B
TRIM45			EEF1B2P6
CTB-31O20.2			EFNA3
LOC100996255			SLC25A37
SELM			TRABD
RP3-327A19.5			RNA5S17
KCNC4			DNAI2
RAMP2			RN7SL646P
ZNF546			LRRC3B
LOC285147			RPL36AP40
ADAM1A /// ADAM1A			NIP7P1
LOC100506713			ELMOD3
KCNS3			RNA5SP207
WDR19			TECPR2
SLC25A27			IL17C
AGPAT9			GEM
KIAA0895L			DAW1
PMM1			CRYGA
TEX14			OR5AM1P
MMAB			MIR4465
KCTD15			RSPH10B
MYC			LIFR
RP11-680C21.1			MIR1204
NME3			USB1
LINC00476			OPN1MW
C10orf25			PELI1
ZNF677			RPL5P27
KANK2			C5orf60
PCBP3			OR2A13P
RP11-318A15.2			ABRA
RP11-79P5.9			IGHJ5
ANTXR2			MCC
LOC100506472 /// TAB1			AK4P4
TSPAN4			SBF1
HEMK1			RN7SL246P
ZNF25			PRR3
HFM1			DEK
VWC2			CDON
CECR1			PYROXD1
IBA57-AS1			MCHR1
SFRP1			BAZ2B
EMCN			PLK3
LXN			MOB4
SRSF6			ACE3P
NABP1			MFAP3
EFNB3			KLHL22
SCARA5			EDA
PNPLA7			BTG1
ATP1A1-AS1			KCNQ1OT1
DICER1-AS1			DSTNP5
RP11-1260E13.2			TRIB3
FAXDC2			MDH2
ABCC3			RN7SKP196
UBAP1L			ZNF184
C3orf33			OR51H1
THSD7A			DPRXP4
POLI			EIF2B5
LINC00622			RNA5SP134
RFNG			KRT18P15
AMOTL2			PSMA5
SF1			RN7SKP256
ZNF83			MIR6861
RP11-539G18.2			ZNF12
KIAA1107			ANKFN1
KLHL13			GLRA1
RPL10L			RN7SKP271
LOC100131564			MIRLET7DHG
ACE			RASAL2
SPATA20			HOXA4
CCDC148			BCRP5
BEX4			NR2E1
LOC644656			MTCYBP2
LPAR6			MIR7111
SDR39U1			RN7SL505P
RPL11			CRISP2
SCARNA17			ZNF793
TRIM73 /// TRIM74			P2RY2
VIPR2			KRT16P4
EGR2			EIF5AP4
LOC728705 /// TMEM263			TDGP1
RP11-395I6.3			HMGN1P30
TSPAN31			SART3
LINC00853			TMEM117
DKFZP434C153 /// OBSCN			ASIC3
RADIL			MIR324
IPO11 /// LRRC70			PSTPIP2
LOC101927820			RASL10A
MICA /// MICB			MIR4697
LINC00526			PDE1A
GSTM2			CCT8
ADAM33			RAP1AP
SSBP2			C1orf159
SAMD11			ANKHD1
NSUN6			HMGN2P3
CTD-2366F13.2			LRRC63
ANAPC4			NACC2
ASAP3			WDR76
LOC100507316			ZNF773
TTC28-AS1			CASD1
LOC102724814			U2AF1
CCDC74A /// CCDC74B			SERF1AP1
LOC100130429			C7orf25
TTN-AS1			NXPE2P1
LINC00938			HS1BP3
PON3			ABCB10
SGCE			RN7SL678P
RP11-513M16.7			RPL23P10
NUDT2			A1CF
EVC2			OTUD7B
SHPRH			C20orf173
C16orf52 /// LOC101930115 /// VWA3A			GAGE12E
U2AF1L4			RNA5SP138
LOC102724689			POU5F1P6
EPDR1			CACNG6
DHX58			WDR47
TSLP			KCNG3
KLHL23 /// PHOSPHO2 /// PHOSPHO2-KLHL23			PCNX
CCL3 /// CCL3L1 /// CCL3L3			RNA5SP127
LOC375196			RNA5SP188
PRDM6			IL9RP2
FAM86A			PMS2P1
RLN2			SNHG3
ZNF439			PEBP1P2
CCNT2-AS1			KCNH5
HIC1			RPS18P1
FZD10-AS1			PTAFR
WDFY3-AS2			MIR4269
KAT2B			NCR3LG1
L3MBTL4			WDR81
UNC13C			RPL29P24
RP11-1191J2.5			TP53RK
CTC1			RPS20P20
KIAA1683			MIR3184
CTC-471J1.2			PRPF38A
RGN			SNAPC5P1
LOH12CR2			DUSP3
STON1			RAC1P9
TUBE1			OASL
KRBOX1			CTSA
LOC101927164			PEX7
ATP10D			MIR590
SCN5A			KRT16P6
PDGFRA			EBI3
ZNF571			SLC9A6
COLCA2			NKD2
KIAA1755			OR2T34
MATN1-AS1			OVCH1
GS1-259H13.2			OR4A2P
FAM228B			CLHC1
C12orf57			C14orf1
SCARA3			KCTD2
AC008746.12			ERCC3
WNK4			ZDHHC8
SOD3			RN7SL861P
PITPNA-AS1			C6orf211
LOC101929224			MIR5705
PCDHB7			FAM196B
CTD-2528L19.6			CAMP
KCNT2			PSG1
LINC01125			MALSU1
LINC00240			MIR1296
ITPR1-AS1			OXCT1
BTG2			SSBP3
TDRD6			PSPHP1
GPM6A			CST1
CENPV			PACS2
RNF180			GSTA2
PAN2			H2BFWT
ZDHHC8P1			CLNS1A
LOC101928068			LAMTOR5
LAMA2			RABEPK
ABI3BP			DZIP3
FSTL3			IK
NR4A1			KRT8P26
TCIRG1			ARHGEF15
LOC100289230			OR13C3
SEMA5B			COX8C
GS1-124K5.11			MIR411
LOC286272			RNF44
XYLT1			CCDC176
LOC101926934			TSPY8
HMCN1			PSMD12P
LINC00271			SRPR
CYP2C8			CHAD
C11orf87			UBTFL9
NUDT9P1			TRIML1
LOC101930114			MIR4717
NRG2			TNR
GATS			C17orf51
ZNF674-AS1			MANSC1
PLCL1			ITGA7
TMEM116			RAB37
SPESP1			RPS21P1
PCDH18			CRTC2
GSAP			RPL7L1P9
DLX6			KIF3A
LINC00886			RPL36AP35
MYH3			SPANXB2
RGS20			TTC28
LOC101930052 /// LOC102724562 /// MST1 /// MST1L /// MST1P2			TADA2B
NFATC4			MMS19
SPSB3			SULT1B1
PCDH7			GAPDHP66
NUMA1			SMIM13
COL27A1			SRMS
FMO5			KCNE5
KIF7			CCDC78
ARRDC4			VN2R10P
LINC00965			TRMT44
GLT1D1			TOMM22P2
PABPC1L			PCYT1A
LOC440149			CTSB
LEPREL2			FZD4
LINC01122			NIFKP9
FOXA2			ZNF847P
LINC00959			KANK1
CCDC89			AQP7P1
LOC441242			SAR1P3
LOC101927043			SAP18
PDCD4			MIR345
LOC101060264			CSNK2A1
PDK4			MIR6856
LOC101928605 /// OR2A1-AS1 /// OR2A20P /// OR2A9P			OR4D10
MIRLET7BHG			RPL5P21
C4orf46 /// TOMM7			ICE2P1
MIR6872 /// SEMA3B			HELZ
AK021804			FLT3LG
HIST3H3			SPCS2P1
PCAT19			PRDX2P1
ANKRD20A5P /// ANKRD20A5P			BMP3
PELI2			ZBTB25
CLK4			ECE2
LOC100130285			MRPS15
RP11-846E15.4			TCL1A
DNAJC12			C6orf62
EGOT			SNORA74B
MTMR11			MIR3689D2
FAM73A			CPA1
SLC25A35			SYP
TWIST2			LGI3
THBS1			EIF3K
LOC101927668			TYROBP
MSANTD2			RLBP1
FAM65C			TJAP1
LOC100996404			MTHFD1P1
ZC3H12C			MYH6
RP11-10K16.1			ARMC10
PINLYP			MMP16
RP11-999E24.3			C8orf17
LOC728392			RNA5SP405
ZNF826P			FTLP5
PRELP			SLC31A1P1
HPN			FCF1
SCRN2			PGBD4P3
NACAD			FAM185A
C21orf2			CD28
EPOR			KRT18P62
NT5M			PPM1L
ZC2HC1A			DAP
FES			KIN
RP11-642D21.1			WDR24
CHRFAM7A /// CHRNA7 /// LOC101929970 /// LOC101930361			FOXF2
LOC100506014			FGFR3P1
LOC202025			BTN2A2
FAM162B			OR10G4
CMBL			ACADS
DUTP1 /// DUTP1			TECTA
LOC101928728			OR52B4
ARID4A			MIR549A
SFTPD			ATP6V0E1P2
TMEM55A			KCNN1
PPP4R1L /// PPP4R1L			RPL35AP21
LDHD			ADA
NUDT16P1			MIR6729
LOC101927359			RPL7AP3
DDX19B			FGD4
GPR137B			ATP5A1P3
AADACP1			TRAJ58
FAM66B /// FAM66C /// FAM66D /// LOC101928910 /// LOC102725108			PODXL
RP11-16N11.2			NDUFA5P7
CFH			RN7SL647P
ERO1LB			C5orf46
RSPO1			KIAA0368
JUN			C14orf169
OTUD1			IFT122
HOXD10			NUAK2
LOC102723927			MTRNR2L3
MYRIP			RPS27P18
LOC283713 /// OTUD7A			TGIF2LY
RP11-1152H14.1			DHRS4L2
GREM2			NPIPB3
RPS6KA6			ERICH3
MAGI2			PHLDA3
ATOH8			FAM153C
HSF4			HSPD1P9
GTF2H2 /// GTF2H2B			SLC10A5P1
ZFP36			KIF5B
AASS			COL26A1
PLA2G7			CHAC2
ZNF784			PADI3
ZNF578			ANKRD17
EPPIN /// EPPIN-WFDC6			GSTO1
PXN-AS1			CCNB3P1
LOC100286925			PSMD8P1
RP11-5C23.2			ZNF780A
C1orf64			LSINCT5
EVA1C			ACVR2A
JUNB			M6PR
HCG27			EIF2AP4
LMO7DN			FTLP10
TEPP			VN1R76P
RAPGEF3			FAM217B
GOLGA8N			HERC2P10
BOK			GPBP1
SLITRK5			IL32
LOC102724156			EDRF1
TUSC1			EGFEM1P
CHGB			MIR3162
DLX5			CCT7
ZFP36L2			FAM90A18P
HECTD2			SSR2
COL6A6			FAM180A
GAS1			LSM3P4
ERV3-2			RN7SL503P
MINOS1-NBL1 /// NBL1			NCR3
AX746830			ECD
FAM66C /// LOC101928910			DOK6
KPNA5			PARD3B
LOC102725451 /// TPTEP1			RCC2P6
DKFZP434L187 /// DKFZP434L187			PRKRIP1
MIRLET7D			TSTD1
ATG16L2			MAGEE2
CR936796			TYRO3P
BZRAP1			MIR8075
RCBTB2			CGREF1
LOC101927272			PSMA8
PAK3			CST4
ANKRD29			RPS15AP18
ENO1-AS1			TMA16P2
PSMG3-AS1			SERINC5
PAM			ZSCAN5C
BST1			COL24A1
PAN3-AS1			PRM1
PRSS12			HAR1B
LOC202181			ADCY7
TMEM98			RBM48P1
GLIDR /// LOC728903			ZFP30
NR2F2-AS1			COX17
LOC153682			MYEOV
GARNL3			HIATL1
GLYCTK-AS1			CNNM3
LOC101927811			FOXQ1
SMTNL2			MINPP1
COL2A1			DGKZ
SLC26A4-AS1			PARK2
RNF157-AS1			ENPP7P5
SERTM1			EBAG9
ZNF502			HMGN1P19
NR2F1-AS1			PHBP4
PLA2G4C			ARMCX7P
LOC100130476			TBC1D13
GPER1			MIR1203
RPS6KA5			NDUFB1
DPY19L2P2			XRCC6P4
ANO4			TARS2P1
LOC101928200			SFT2D3
LOC100288152			KIR3DL3
TTYH2			NCKIPSD
LOC286367			RPL29P23
MORF4L2-AS1			CTAGE6
OLFM1			RN7SL771P
PTGFR			RN7SL570P
PLN			GPATCH2L
ZNF667-AS1			TUBB8P8
INTS6-AS1			FABP5P4
PKIB			AP5S1
FPGT-TNNI3K /// TNNI3K			FH
LOC101927752			C19orf66
RP11-1109F11.5			SOX15
CCDC110			MIR489
COX10-AS1 /// LOC100506974			GPBP1L1
NLGN1			MIR567
RP11-375I20.6			CLEC3A
RP11-111J6.2			RPS10P20
LOC101927468 /// LOC101929257 /// LOC102724558			ZNF655
LINC01355			SP140L
LOC283588			RGS12
RP11-196G18.23			MDK
LOC284454 /// MIR23A /// MIR24-2			ZGLP1
IRS1			ASF1A
BC040901 /// CTC-241N9.1 /// LOC100996419			ARPP19
LINC00086			DPM1
RP11-355B11.2			MAPRE2
RP11-190A12.8			TFAP2E
LOC283861			OR4A45P
CATSPERD			RPS26P11
GIMAP2			LIG3
TMEM200B			CLEC9A
LOC100507557			HTR6
BMPER			MEIKIN
AMDHD1			RSPH14
SLC26A4			MIR4459
CACNA2D1			ARC
GADD45B			AKIRIN1P2
FBXO15			RFPL1
FAM189A2			NACAP6
CCL14 /// CCL15-CCL14			MTND6P5
PPM1M			RN7SKP241
BEND6			ZNF467
TMEM132B			SLC7A4
ZNF790-AS1			LCE5A
LINC00540			NF1
LOC101927305			TRAJ34
ARHGEF26-AS1			TAS2R38
GABRB3			TMEM167AP1
COL28A1			GNRH1
GPR22			ZNF544
SCARNA13 /// SNHG10			TPCN2
TRAF3IP2-AS1			MIR6803
RP4-813F11.4			TBX22
CTD-2373J6.1			OR4S1
RUSC2			MTND2P31
SFRP5			RNA5SP287
LOC101928963			MIR4523
LINC01305			NPY1R
PPAPDC3			RDH16
LOC102723954			DKKL1
FREM3			MADCAM1
ITM2A			MASP2
EN2			CATSPER3
ST6GAL2			WRN
SHISA6			MBD6
GGTA1P			MIR302C
KIAA1324			KCNH7
GAS2			ITLN2
KHDC1			KRT8P42
EMILIN3			GRPEL2
SNHG18			PBDC1
ASTN1			RPS29P22
CTA-246H3.12			MIR629
FLJ34503			USP7
LINC00472			VPS37A
RP11-489E7.4			ISCU
CTD-2554C21.3			USP9YP11
LOC100288911			PARP14
LOC100130417			ZNF648
EDNRB			RAB11AP1
RBFOX3			CST3
NIM1K			ACOT1
FGF14-AS2			GTF2A1
C6orf147 /// KHDC1			PRG4
IGFBP7-AS1			PHF7
TRAM1L1			TRIB2
RP11-353N14.2			RPGRIP1L
LOC100996412			RN7SL425P
GNG11			POPDC2
VWDE			PHF8
STK24-AS1			ZNF317
TRIM52-AS1			OIT3
ZNF711			MTND5P8
LOC100507283			GPAM
TPST2			DEFB118
LOC284630 /// TTC34			RN7SL465P
NR4A2			SS18
LOC102724483 /// PIGL			HSD17B13
TMEM200A			DNAJC5G
KLF4			ACCSL
ZNF213-AS1			TIGD4
OSR1			TRAV23DV6
RP11-285J16.1			NME4
LOXL4			UCHL1
ZNF285 /// ZNF806			RN7SL35P
LOC100272217			TDH
MYOZ2			RAB43P1
LOC101927330			ESPNL
GNAS-AS1			PFN1P4
FAM155A			RN7SKP281
MAGI2-AS3			TCHP
PRICKLE1			FSCN1P1
LOC101927196			MED13P1
EIF3J-AS1			GPR139
CD200			HSPA8P7
TMEM101			KRT18P64
DPT			SEC14L3
PLAG1			LBH
MSTN			RNF133
PCP2			CKS1B
C11orf92			RPL39P31
RP11-216L13.19			ZNF438
C8orf88			HIVEP2
DNM3OS			HNRNPMP1
PGAP1			RBM7
RORC			TFRC
TBC1D8B			PTCHD3
ARGLU1			OR13C9
PAPLN			MIR1273E
LOC101927841			RNA5SP448
ITGA9-AS1			NANOGNBP2
FBXL16			SIRPA
PRRX1			WDR36
EPOR /// RGL3			RMRPP5
LOC100507577 /// LONP2 /// SIAH1			POLR2KP2
MICA			LELP1
LOC283177			OR8G1
CRISPLD1			PLRG1
C1orf213			MRPS21P1
ADH1B			MIR5188
RGS7			SH2D4B
KAT2A			KRT18P31
TCEA3			RPL7AL2
KLHL32			STK11
ZNF540			RN7SL352P
SHC2			ALAS2
MIR6883 /// PER1			KBTBD6
LOC101929855 /// LOC102724851			SEC61G
C19orf33			RNF214
CELF6			SPERT
LOC400622			MTND3P9
MIR143HG			VRTN
LYPLAL1			ZNF730
DPY19L2			MIR647
DMRTC1 /// DMRTC1B			LGI2
RP4-635E18.8			RN7SL52P
AK054988 /// TPTE2P1 /// TPTE2P1			RNF11
LOC100507468			RASSF3
EGR3			RPL39
LOC101928797			DDX10P2
AF520793			POLR2J
SLITRK4			ZNF717
UGT2B28			ROGDI
GSTM5			CUX1
USP51			ISCA1P3
LUM			PLXNB3
UBE2QL1			DPP9
LPHN3			HNRNPA1P10
EDN3			RPL10P1
C1QTNF7			PPP3CA
F10			CELA1
F3			BMP2
YPEL4			IGFLR1
AMT			PPP2R2A
KLK11			OR7A19P
CTNNA2			COPS8P2
FBXL22			EIF4BP8
LINC00086 /// LINC00087			MIR212
LOC101060604 /// SLC7A5P1 /// SLC7A5P2			EPHX4
ZDHHC15			CLLU1
LOC100270804			SDHC
LINC00667			PTP4A3
RNASE4			CYCSP42
PKDCC			RNA5SP101
PARD3-AS1			PSMA3
CNRIP1			BEST1
CYP4F12			HSPE1P25
SERHL /// SERHL2			SDAD1P2
SLC27A6			MIEF2
RP11-332H18.4			IQCK
LRRN4CL			SAMD15
STMN3			PREPL
BRE-AS1			BTBD2
RBM11			KRT8P22
GLI1			SIGIRR
UBQLNL			MEPE
EPHX2			TULP3P1
LINC00865			RNA5SP213
KIF26A			ACSM2A
CYS1			RPL9P33
LIX1			APOBEC3A
ARMCX4			MIR890
COL9A1			OSTC
SLC25A21-AS1			COL6A4P1
ID4			PTPRCAP
SEPP1			KRT8P38
PCDHB5			ETV2
AMN1			SYF2P2
LOC101929340			RPS4Y1
DYNC1I1			SESN1
SNORD116-17 /// SNORD116-19 /// SNORD116-20 /// SNORD116-21 /// SNORD116@			MRPL23
LOC100506476			LEMD3
SYNDIG1			FURIN
ZNF302			RRAD
NEBL-AS1			OR7L1P
ZNF300			MYOF
PLSCR4			KLB
CEACAMP3 /// CEACAMP3			RNA5SP481
AK055458			CD300E
MLLT4-AS1			EIF5
FGF7 /// KGFLP1 /// KGFLP2			CHMP1AP1
LOC100506691			GUCD1
LINC00939			KRT31
FMOD			TMEM30C
FLJ38379			ZFP3
CFC1 /// CFC1B			OR4C50P
RP4-614O4.12			ZNF534
LOC441179			HMGB1P20
MRGPRF			MEF2A
PRTG			TRDJ2
LINC-PINT			RPS5
WDR17			MYL12A
HLF			TMEM232
ARHGAP20			KRT18P36
LGALS4			BMS1P1
CENPT			ITGA2
OMD			HNRNPDP1
PRNP			ZNF175
SIK1			TRAPPC2P9
TPTE2P5			OR5P2
PGR			TRGVB
ZNF883			SMG1P3
LOC100506125			SUCNR1
SCML1			TSSK2
DACT2			FOXR1
MIR100HG			MASP1
TUNAR			SNAI1P1
MIR29B2 /// MIR29C			NDST1
FXYD1			RAB4B
LOC101927268 /// LOC102724851			SALL2
PRKAG2-AS1			CAB39
RP11-127B20.2			MRPS33
RP11-486G15.2			DHRS12
KIZ /// PLK1S1			RN7SKP108
ARSJ			TMEM215
LOC100507311			ADCK2
KCNIP4			RBM48
SYT14			MEAF6P1
LOC158434			MTMR4
RP1-78O14.1			KIR3DP1
MIR143HG /// MIR145			CCDC57
LOC728819			TIGIT
ZNF571-AS1			IQCJ
PLAGL1			HDAC1P1
FAM198B			FDPSP8
SPON1			TMA7
SATB1			SAMD14
FNDC5			RANP4
RP6-24A23.7			TRBV17
MGC70870			FAM81A
ZCWPW1			APOC1P1
SMOC2			REEP2
GPC6			VN1R82P
RRN3 /// RRN3P1 /// RRN3P2			FAM173A
DLX6-AS1			RN7SL140P
SEC14L1P1			MIR762
GLIS1			NPM1P13
TMEM100			RAB9AP3
RBM20			ADAD2
DPP10			ZNF646
CDH2			ACADL
SSPN			MIR548V
LIMS3 /// LIMS3L			MIR4695
ZNF582-AS1			LAMC2
RP11-382B18.4			OR6J1
RP13-20L14.1			MTND6P17
ATP8A2			C10orf99
STK32B			COPS7A
GSTT2			PPP2R2D
LOC100128108			FAM196A
KGFLP2			RN7SL395P
ASPA			PNLDC1
SCARNA2			HERC2P3
ZNF214			OLR1
CUX2			RPS16
SLC47A1			RPL7P55
ZNF837			RN7SL703P
ADAMTS9-AS2			CALML5
RARRES2			RIN2
PCDHB15			RAB40A
RP11-38P22.2			LPPR3
LOC101927391			KLHL7
HPGD			RSL24D1P3
MROH7			RNA5SP84
DIO3OS /// MIR1247			TBRG1
GLT8D2			PLXNB2
ARMCX5-GPRASP2 /// GPRASP2			ZNF628
LOC101927263			DAZAP2
DPP10-AS1			NFKBID
JAZF1-AS1			ARL4A
CECR2			SSX2
ADIRF			CBLB
MIR424 /// MIR503HG			UGT8
ATHL1			DOCK8
KRTDAP			SRCIN1
KLHDC1			PWWP2AP1
LIMS3-LOC440895 /// LOC100288570 /// LOC100507334 /// LOC440895			SIGLEC20P
MSX2			MIR15A
LRRK2			ENKD1
ZNF404			DDX23
CYP24A1			IL36RN
ABCA17P			CPNE1
CPED1			LGALS14
RBP7			FAM69A
CYBRD1			IQGAP3
AZGP1			MIR4774
LINC00899			GSG2
GAS6			TTC31
CCBE1			IL17B
ATP1A2			ZNF620
LOC100506558 /// MATN2			IFRD1
PABPC5			JAGN1
HCG4			PLA2G2A
NTN4			DUOXA2
FGFR3			IGBP1P5
LINC01354			KAAG1
SUGT1P3			PTPN7
DEFB124			RPS27L
ZNF311			GTF2IP3
FAM169A			PRAP1
MAMDC2			NBPF21P
SEMA3E			RN7SKP15
LMOD1			LAIR2
ECM2			MIR586
WASIR1 /// WASIR1 /// WASIR2 /// WASIR2			YBX1P8
CTGF			POMGNT1
LINC00323			ADAM11
FAM13C			RN7SKP179
LEF1-AS1			GAPDHP47
VILL			PRR35
C1orf168			POLK
BEX2			ALKBH2
AF131215.8			SNRPA1
GPR64			MIR548S
LAMP5			MIR4314
RRN3P1			EMC1
ZNF300P1			RPL5P14
CES4A			PNLIPRP1
FLRT2 /// LOC100506718 /// LOC102724348			FBXL2
PABPC4L			FRS3
ADHFE1			NBPF15
CXorf57			MAP3K11
LINC00893			SEZ6
PGM5-AS1			MIR6814
TRPC1			NDUFB3
RBM24			ADRA2A
FAM153A /// FAM153B /// FAM153C /// LOC100507387 /// LOC101928349 /// LOC101930363			SNORD51
DIO3OS			GDF6
KCNH8			NCF1C
SMAD9			KLRC1
SLITRK6			ALDOAP2
NR3C2			MAML1
LINC01139			RAB17
ROBO3			DUXAP7
ZNF334			NSUN3
RP3-525N10.2			RFC2
LRRN1			MADD
LOC100505851			RN7SL67P
ACTA2 /// ACTA2			ZBTB2
LINC00261			DEXI
SLC6A2			TEX11
FAM226A /// FAM226B			MIR5688
SRRM4			TXNRD3
RGS7BP			PHF1
UCA1			GCOM2
MIR101-1 /// MIR3671			SULT1A3
ZNF662			OR5BS1P
CNTN3			LDLR
SCGB3A1			C8orf58
PEG3-AS1			MTND5P20
PAX2			ASUN
VSIG2			CDC42
MICU3			AVPR2
LOC102723918			TPMTP3
IHH			GRINA
LOC100505776			GOLGA8DP
KIAA1210			GPR119
LRFN5			MIR2114
ANGPTL1			IL16
TPTE2P6			TRAPPC2P3
TMEM132C			OLIG3
TCEAL7			PPP1R2
GPR133			SNRNP200
LOC101060391			INF2
WIF1			GABRR3
BEX1			RPRD2
C16orf89			HSPA8P6
MIR424 /// MIR503 /// MIR503HG			TTTY13
PCDH10			NPM1P17
TRH			SLC29A4
			KIAA1244
			RN7SL665P
			CBX3P9
			CPS1
			RNF7
			NTF4
			CALM1P2
			RPS21P4
			RNA5SP469
			OR7E117P
			ONECUT3
			PPP1R26P1
			TNFSF15
			SLC2A13
			DEFB113
			TRIM13
			NAB2
			MIR7705
			RPL31P35
			AMIGO2
			NUS1P4
			GSTM3P2
			MTND3P3
			CD177P1
			SGK2
			NCOR1P2
			OFD1P2Y
			CHST3
			LECT1
			MRFAP1
			ZMAT5
			TDGF1P4
			FXR2
			ERN2
			RN7SKP73
			BNIP3P3
			MFAP1
			TRIM10
			CERKL
			MIR8057
			OR2B11
			OR10G3
			YWHAEP1
			MVB12B
			ARMC12
			PDCD6IPP2
			RPL7P19
			ETF1P1
			ESYT2
			SCNM1
			MIR532
			RPL34P18
			ACKR1
			TXNDC16
			ADH5P3
			RN7SKP75
			MIR378D1
			KPTN
			LITAF
			RWDD4
			SMCP
			RN7SKP231
			SERF1A
			MIR4257
[truncated: 1,419 more rows]
