# Supplementary material for: Overexpression of TICRR and PPIF confer poor prognosis in endometrial cancer identified by gene co-expression network analysis
Source: Aging (Albany NY). 2021 Jan 20;13(3):4564–89. doi: 10.18632/aging.202417 (PMC7906164; doi:10.18632/aging.202417)
Supplement: Supplementary Table 2 [file aging-13-202417-s003.xls]

## Sheet: Supplementary Table 2
Supplementary Table 2. Detailed lists of the intersection genes of the selected modules.
GSE17025	GSE63678	GSE115810	TCGA	GSE17025|GSE63678	GSE17025|GSE115810	GSE17025|TCGA	GSE63678 |GSE115810	GSE63678 |TCGA	GSE115810|TCGA	GSE17025|GSE63678 |GSE115810	GSE17025|GSE63678 |TCGA	GSE17025|GSE115810|TCGA	GSE63678 |GSE115810|TCGA	GSE17025|GSE63678 |GSE115810|TCGA
44083	44081	43891	ANP32A	CENPA /// SLC35F6	DLX6	ANLN	44085	PSMA1	C3	BIRC5	MELK	CKS2	HDGF	UBE2C
GABRP	CENPU	43898	ANP32C	MYBL2	PSAT1	TACC3	TIPARP	GINS2	KRT7	INPP5F	RRM2	E2F3	CEBPG	NUSAP1
FAM72A /// FAM72B /// FAM72C /// FAM72D	FDPS	SFN	ARHGAP11B	GTSE1 /// TRMU	KIAA0226L	FAM83D	RGL1	EXO1	IGFBP4	CYR61	CEP55		TNFSF13	TROAP
SLC38A1	HIST3H2A	PDZK1IP1	ARHGAP19	LPAR6	TXNIP	NUF2	NDNF	SNRPD1	SPINT2	SATB1	DLGAP5		WFDC2	ACOT7
IGF2BP3	GALC	AOC1	ARL6IP1	LRFN4	CLIC4	CENPF	MEG3	PRIM1	FAM216A	MYO15B	TPX2		PXDC1	LINC00667
SLC6A10P /// SLC6A10PB /// SLC6A8	PYCRL	MSLN	ARSA	POM121C	ATP11B	DIAPH3	TMSB15A /// TMSB15B	EFNB2	PAX8	CD302 /// LY75 /// LY75-CD302	FOXM1		FUCA1	ACE
C16orf59	EPHB3	SAA1 /// SAA2	ART5	HMGB3P1	FOSB	DEPDC1B	PCK2	CCDC86	RABAC1	AMT	KIF15		IGFBP6	HMGB1P1
CFH	MIR6840 /// PILRB /// STAG3L5P-PVRIG2P-PILRB	ALPP	ASB9	BOP1 /// MIR7112	IHH	RNFT2	MLH1	NUP37	TCFL5	CBX7	PBK		ARMC8	ABCF1
SLC52A2	UBE2D4	LAMB3	ASNSD1	ASAP2	ID3	CDCA2	CHST3	IMMT	UBE2I	GNG11	CDCA8		DHCR24	ABCF2
ARHGAP11B /// LOC100288637	TTLL12	EPS8L2	ATAD5	VILL	DUSP2	SLC16A10	FOXO1	DHCR7	LSR	MTMR11	NEK2		EFEMP2	ABCG1
EGLN1	SNRNP25	BIK	ATL3	NT5E	RRN3P1	SPC24	TBX3	YPEL5	MAP3K12	DNAJC12	ASPM		ST5	SOWAHC
WDR92	MIA3	LOC100129518 /// SOD2	ATP5B	ADIRF	PDZRN3	UHRF1	MYLIP	GART	HMGA1	ME3	NCAPG		TUBB6	CYR61
ORC6	RANBP9	TMC5	ATP6V0A2	SSPN	CTGF	KIF18B	ZKSCAN7	GLOD4	BLMH	ARHGAP10	SPC25		EFS	MYO15B
PRICKLE2	PDE6D	CXCL1	ATXN2L	CA3	ST3GAL5	SBK1	ATXN1	CHEK2	CDKN1B	LYPLA2	NDC80		STEAP1	ARHGAP10
CTA-445C9.15	CCDC51	C1orf106	AURKAPS1	FMOD	ACSL5	FAM155A	EFHD1	C1QBP	TATDN2	WT1	CDC20			GNG11
AK091028 /// GMDS-AS1	TRAF3	S100A4	B3GNT9	ZNF302	LOC100506558 /// MATN2	UBE2T	SNRK	TRIP13	IPO4	CXCL12	TOP2A			LYPLA2
RP11-932O9.10	C2orf47	MUC4	BAZ1B	SEPP1	PLAGL1	MTHFD2	AK021537	DNM1L	UVRAG		KIF20A			PLS1
EIF2AK1	AGMAT	CHGA	BCAS2	SHC2	PRNP	KIF1A	GABRE /// MIR224 /// MIR452	G3BP1	SLC16A1		KIF14			PPIF
ASAP1	ALAS1	G0S2	BCL2L15	GAL3ST1	KLK11	CDK1	NR2F1 /// NR2F2	RAN	PDPN		KIF11			BIRC5
CDC27	ZSWIM8	APOL1	BET1L	ZNF506	ACOX2	KPNA2	CKMT1A /// CKMT1B	CHAF1A	FUT2		NCAPH			ASCC1
SNX10	IARS2	TUBA4A	BOD1	FPGT-TNNI3K /// TNNI3K	EGR3	SMC4	ARTN	PAICS	ETV6		PTTG3P			PRRC2A
NETO2	COG8 /// PDF	EFNA1	BRD2	TLE2	TBC1D8B	CDCA5	DEPDC5	MTHFD1	CREB3L1		E2F8			TICRR
AGO2 /// CASC7 /// CASC7 /// DQ574852	PSMA5	ABCC3	BRI3BP	FOXA2	KLF4	SKA3	CD320	DNAJA1	RASIP1		CENPE			MUC1
AC004941.5	PRDX1	CST6	BRIX1	NMT2	NR4A2	EPT1	UIMC1	POLQ	TMEM63A		DEPDC1			VAMP8
IL1R1	THOP1	QDPR	BSN	NR4A1	RCBTB2	CDKN3	CTSO	NINL	SH2D4A		HMMR			WT1
CENPM	MYL5	DUSP10	BTD	FGD6	ZFP36	LMNB1	C9orf3	KPTN	RBM42		RAD54L			CXCL12
EIF5B	CNNM4	C6orf48	BUB1	ABCC5	JUN	TICRR	CPZ /// GPR78	MRPL11	REPS2		TTK			ALDH1B1
DDX6	USP2	PPL	BUB3	ZNF34	EGR1	SGOL2	TAF1C	UBE2S	ASXL1		HJURP			ALG2
FRK	C19orf73	MUC5AC	BUD13	MAP3K1	MSANTD2	PIF1	OLFML1	POLE2			KIAA0101			ALKBH1
RBPMS2	NSUN6	TRIM31	BYSL	ROR2	LINC00965	CDC25B	EPPK1	POLD1			PTTG1			TMEM237
BOLA3	PLIN1	RASAL1	BZW2	C3orf18	CEP68	ESCO2	IRS2	SHCBP1			MKI67			ANAPC1
INA	THADA	RHBDF2	WBP1L	CORO2A	CA11	CKAP2L	ALDOA	RFC3			CDCA3			ANKLE2
HSPB8	ZNF350	TNFSF14	C10ORF2	ACACA	SCARA3	CDC7	GABARAPL1 /// GABARAPL3	ECT2			MCM10			ANKRD13B
ENTPD3	RHPN1-AS1	NUPR1	PLEKHS1	DDX3X	SSBP2	NEIL3	PTK7	TMEM106C			CDC45			ANKRD27
SLC10A4	SNRPA1	LRRC17	C11ORF82	IDE	GSTM2	DHFR	IL1R2	GPI			ERCC6L
CSNK1G1	TLR3	RIPK4	ASUN	TMUB2	FAXDC2	LRRC20	WNT2	CELSR3			KIF23
ENOPH1	DNAJA3	ELF3	RHNO1	SLC25A10	HEMK1	POC1A	C1S	TSR1			CCNB1
CCNYL1	MRPL39	WASF3	C12ORF43	DDX19A	WDR19	EZH2	SLC26A10	SARS2			DTL
RP11-174G6.5	TPD52	OXCT1	TEX30	PAWR	GSTM1	TMPO	CALD1	TOMM22			KIF4A
DDIAS	F12	TNFAIP2	KTN1-AS1	LTBP3	ZBED8	MTFR2	AEBP1	EEF1E1			OIP5
KIF21A	ZBED1	CD47	HEXA-AS1	ATP7A	ZSCAN26	RFWD3	GAS6	TDP1			CDC25A
TBC1D31	CAMK1D	LLGL2	C16ORF59	MPZL1	MEIS3P1	CASC5	TPM2	PCNA			AURKA
FADS1 /// MIR1908	TMX1	B3GNT3	RMI2	ABHD14A /// ACY1	CRBN	CDT1	RUNX1T1	SLC25A5			MCM4
NR1H2	MRPL24	CDCP1	C16ORF91	F8	ZDHHC17	ZNF367	HAND2-AS1	PNO1			ESPL1
MCU	PHACTR1	RASSF7	C17ORF104	ENSA	LAD1	CENPK	MOXD1	MCM2			GTSE1
VARS	NUDT18	ARHGEF16	C17ORF53	CALCOCO2	NR1H3	TIMELESS	TMEM43	PPA2			PRC1
PLOD2	RABEPK	LAMC2	C17ORF75	OCLN	PCF11	SAPCD2	DBNDD1	CBS			KIFC1
ARFGEF1	SLC27A5	GLDC	FAM210A	PPIF	LRRC49	FOXRED2	CDIP1	HDAC5			GPSM2
ATG9A	VANGL1	PRRG4	C18ORF54		FANCL	ZWILCH	LYPD1	WDHD1			ZWINT
PIAS2	PHF2	PRSS22	TIMM21		OGFOD3	PKMYT1	TGFB1I1	LIG1			FANCI
PPM1B	ZNF669	CD55	C18ORF56		CD24	TCF19	GEM	NUP93			CDC6
ABHD12	OSBPL8	NFE2	C19ORF40		RBM4B	RPL39L	CHN1	PRMT1			CCNE1
TARSL2	FDXR	SPTBN2	C1RL		TSPAN14	GAS2L3	NDN	CCNB2			KIF2C
RUSC1	GAK	MVP	C1ORF112		PURA	E2F1	GAS1	NME6			STIL
SFT2D2	C20orf24 /// TGIF2-C20orf24	PI4KB	SELRC1		POGLUT1	IGIP	ENPEP	DCTPP1			TK1
CCDC88A	BCL2L13	MST1R	C1ORF174		DET1	DSCC1	COL15A1	MCM3			NCAPG2
AK022793 /// BC043213 /// CTB-175P5.4	GRPEL1	HRH1	GID8		TMEM8A	CENPO	PRND	DKFZP586I1420			BUB1B
IMPA1	UBQLN4	RARRES1	MRGBP		LOC100507577 /// LONP2	WHSC1	XYLT1	KLHL24			GINS1
TMEM206	YIPF3	VNN1	C20ORF24		MUC1	CHAC2	LEFTY1 /// LEFTY2	ATP5G3			TYMS
ESRP1	GUF1	DEXI	MGME1			HAUS8	SERPINF1	CBX5			RAD51
MTPAP	POMGNT1	IER3	C21ORF49			CMC2	JAM3	RNASEH2A			SPAG5
HSPA4L	WNT5B	NT5C2	C2CD4B			BRIP1	FAM127A	GTPBP4			LMNB2
ADA	SNAP91	EGLN3	C2ORF44			ARHGEF39	STAP2	SLC29A2			FAM64A
DUSP23	POLR3K	SORBS3	C2ORF47			CEP85	OLFML2A	COPS3			KIF18A
MPHOSPH9	MYOZ1	ALS2CL	C2ORF49			POLD3	NCOA1	CDCA4			MAD2L1
GTF2E2	NRSN2	AC012065.7	LINC00471			SGOL1	LHFP	TRAIP			APOBEC3B
NRAS	SPR	CP	FANCD2OS			HELLS	BNC2	LIN37			BLM
HEIH	PNRC1	P2RY14	CMSS1			KNSTRN	HDHD3	TMEM97			CENPN
VWA5A	TARBP1	MMP26	C3ORF37			PDCD2L	RNF144A	VRK1			ASF1B
CCDC43	HYPK /// MIR1282 /// SERF2 /// SERF2-C15ORF63	VCAN	C4ORF46			MIS18A	PINLYP	HSPD1			RAD51AP1
TMEM65	PER2	F13A1	C5ORF22			PNPT1	C16orf45	PTPN2			SHMT2
NIPA1	SNRNP35	ECM1	SIMC1			KCNQ1	COL5A1	CDC25C			AURKB
SLC25A1	BLCAP	PCOLCE	C5ORF30			ELOVL6	GPRC5A	SKA1			ATAD2
FAM214A	WDR18	MMP11	NADKD1			PLK1	LPPR4	PBXIP1			BRCA2
C5orf30	CLTC-IT1	KMO	C5ORF34			DNA2	PAGE4	CKAP2			CCNF
NUP153	CDC42BPA	CD248	C5ORF51			CBX3	ANGPTL2	SPDEF			AUNIP
ZNF200	PENK	MYL9	MB21D1			RAB6B	BHMT2	CSTF2			BRCA1
AMIGO2	KCNK3	TMEM45A	RRP36			KIAA1524	GPR124	GABARAPL2			FANCA
XPOT	ETFA	COL7A1	MMS22L			ARSD	CAV1	TBC1D2			CENPA
RIT1	MAP3K4	PLAT	CCZ1			MTIF2	WWOX	SRPK1			RECQL4
SAMD1	PCDHGA8	CRABP2	CCZ1B			DVL3	RAMP1	MCMBP			BORA
PSMA4	ATIC	PXDN	LURAP1L			ZNF93	PBX3	FANCC			ORC1
C9orf40	COA4	THY1	C9ORF40			EXOSC9	GJB1	NUP88			CKS1B
KLHL7	GNG4	SNAI2	C9ORF91			ARHGAP11A	KCNH2	SLPI			CHEK1
PDS5A	IST1	COL5A2	CA8			NCAPD2	TGFBR3	ERF			PARPBP
TYMSOS	GSPT1	DNM1	CAD			MASTL	MLLT11	GADD45G			CKAP5
INSIG1	ZNF446	FJX1	CARD6			MURC	MAP7D1	RBBP4			GINS4
EIF1AD	LAMA4	DDR2	CASP2			LRR1	DPY19L1	GTF3C2			RACGAP1
MIER3	PTPRS	ZNF516	CBWD1			NUP205	RARRES2	DNMT3A			CCDC85C
DLEU2 /// DLEU2L /// MIR15A	SLC16A2	SCUBE2	CBWD2			DSN1	ITPKB	FUT3			MCM6
CAPZB	RP11-395B7.7	SLC7A5	CBWD3			MCM5	LAMA2	ACSF2			RPP40
ITCH	GEMIN6	NR2F1	CBWD6			ZFP69B	ARMCX1	SGCE			CCNA2
BARD1	IP6K1	CFB	CBX1			DBF4	COX7A1	SLC22A17			CHAF1B
SESN2	ING1	TGFBI	CCDC142			STMN1	DEPTOR	SKP2			SPDL1
CSRNP2	TTC3 /// TTC3P1	GJA1	CCDC150			SMC2	ACO1	NUDT15			H2AFZ
GMFB	TOMM34	LEFTY1	CCDC15			CEP76	OSBPL1A	NIPSNAP1			RFC4
ARMC1	HMOX2	WNT4	CCDC18			TCEB3	SPARC	PRPSAP1			ROBO3
BRD3	ZDHHC7	TMEM120B	CCDC58			CIRH1A	LOC645166 /// LOC654342	RTFDC1			HNMT
ESF1	CYC1	MICAL1	CCDC77			SKA2	TTC23	TIMM50			DVL2
SH3GL1	MIR6834 /// PFDN6	WFDC1	CCNK			BEND3	SCG5	LRRC8D			NOLC1
CCDC109B	SLIRP	PCSK5	CCT2			PHKB	PAMR1	CX3CL1
IL1RAP	SLC25A40	WT1-AS	CCT4			ANKRD32	CELSR2	PRKCI
SAC3D1	TCP11	FAP	CCT5			DCLRE1A	DPYSL2	SPHK2
LYPD6	ATG14	GLIPR1	CCT6A			SMC3	A2M	HNRNPUL2
HMGCS1	OPLAH	MME	CD3EAP			PDSS1	FBXL7	TEAD3
POLR2B	KBTBD11	GPRASP1	CD59			ZNF662	CDR2 /// LOC101060399
C16orf89	TTLL4	HSPA2	CDC23			RASD1	LOC100130872 /// SPON2
BEX1	FTL	RGS4	CDC5L			CTSF	CD93
WIF1	ZNF839	HOXA5	CDCA7L			GADD45B	ECM2
FOS	PTDSS1	RASSF2	CDK2			PAM	GHR
TPTE2P6	DUSP9	PRSS8	CDK4			NUDT16P1	TIE1
ANGPTL1	AP1S1	SEMA5A	CDKAL1			HPN	GABBR1
VSIG2	RUVBL1	NREP	CDV3			ARRDC4	HEG1
CLDN8	HCP5	SETBP1	CEBPZ			STEAP2	SLC2A1
CNTN3	CTDSP2	MITF	CECR1			LINC00526	PTRF
MIR101-1 /// MIR3671	SLC25A11	NLGN4X	CENPH			LXN	STON1
UCA1	RNF113A	COL1A2	CENPI			LPCAT2	PDLIM2
RGS7BP	MRPL33	SAA1 /// SAA2 /// SAA2-SAA4	CENPL			FAM218A	LRRC8E
FAM226A /// FAM226B	TFIP11	CLDN4	CENPQ			HERPUD1	LMOD1
LINC00261	ADK	SERPINH1	CENPV			KANSL2	CPQ
LINC01139	CERK	TMEM158	CENPW			TOE1	RCAN2
NR3C2	DNAJB14	WNT5A	CEP72			GHDC	FOXL2
SLITRK6	MRPL12	EMP3	CEP78			DNAJC11	RAB31
SMAD9	LDOC1	RASL11B	CFL1			ZNF239	PDGFRL
KCNH8	DIABLO	EDNRA	CHCHD3			TBP	HOXD10
KLF3-AS1	VGLL4	VASH1	CHCHD4			NDE1	HEBP1
WBP2NL	TNNT3	C3orf14	CHPF			SRSF7	MEF2C
LINC00893	DNPH1	MISP	CHRNA5			NOSIP	ZCCHC24
ADHFE1	ZNF211	RAB25	CIT			LOC646214	PDGFRB
PABPC4L	CALCRL	LAMC3	CLPB			CECR5	MXRA8
ZMAT1	ZNF259P1 /// ZPR1	NID1	CLSPN			ARHGEF18	CBX6
BEX2	MYC	WFS1	CNBP			SFXN1	ZDHHC14
C1orf168	NXT2	PIP5K1B	COG1			EIF2B5	IQSEC1
LEF1-AS1	MRPS35	AXL	COMMD2			ZNF879	HOOK1
FAM13C	PNPO	PGBD5	COQ2			SOWAHC	PMP22
WASIR1 /// WASIR1 /// WASIR2 /// WASIR2	LOC101929910 /// LOC613037 /// NPIPA5 /// NPIPB3 /// NPIPB4 /// NPIPB5	SACS	COQ3			PRRC2A	TENC1
FAM169A	NSDHL	TRANK1	CPOX				CLEC3B /// EXOSC7
SUGT1P3	NUDT1	VTCN1	CPSF3				MMP2
LINC01354	PODNL1	DAB2 /// LOC101926921	CPSF4				VCL
NTN4	MGST3	KIAA0355	CPSF6				CORO2B
LINC00899	PRDM1	SLC39A14	CPSF7				SYT1
AZGP1	SYNRG	CLDN3	CRELD1				PLN
CYBRD1	EIF4EBP1	GYPC	CRNKL1				SPP1
ID2 /// ID2B	CHCHD2	RBMS1	CSE1L				VWF
ZNF404	RYR1	THBS2	CSNK2A1				CREB3L2
KLHDC1	AMPH	PFKM	CSPG5				ELTD1
MIR424 /// MIR503HG	THRAP3	ATF3	CSTF1				ACTN1
CECR2	RQCD1	MGP	CSTF3				C1R
LOC101927391	PDK1	PTH1R	CTPS1				SIN3B
RP11-38P22.2	SRRD	CDO1	CUL4A				CD2AP
ZNF837	BSDC1	PDS5B	CWC27				LIMS2
ZNF214	COLQ	GSPT2	CWF19L1				TRO
SCARNA2	DCLK2	PIGR	CYB5D2				MMP15
ESM1	AKAP17A	LPIN1	CYCS				RASL12
KGFLP2	PPFIA3	HOPX	CYP27A1				RGS2
LOC100128108	NUDT11	PRSS23	CYP4V2				MPRIP
GSTT2	PCCB	HDAC4	DAGLA				AKT3
STK32B	HCAR3	SMARCB1	DAXX				CNN1
PHF21B	COBLL1	CLIP2	DBF4B				APOLD1
ZNF582-AS1	GON4L	CHSY1	DBR1				CHPT1
LIMS3 /// LIMS3L	POLR2L	SOX9	DCK				PTN
HIST1H2AM	ZNF135	C11orf95	DCLRE1B				SPARCL1
CDH2	TMEM251	CHI3L1	DCUN1D5				DAAM2
DLX6-AS1	NDC1	CACNB3	DDB1				PRKD1
RRN3 /// RRN3P1 /// RRN3P2	LOC339166 /// WSCD1	FGF13	DDX10				ACACB
HAPLN1	PPIH	HOXA10-HOXA9 /// HOXA9 /// MIR196B	DDX18				MAPK10
ZCWPW1	BCCIP	FSTL1	DDX20				FYCO1
MGC70870	HBP1	SPTAN1	DDX23				ANXA6
FAM198B	DBI	HOXA11	DDX27				PID1
FLRT1	NME1-NME2 /// NME2	S100PBP	DDX28				LBH
LOC728819	PXMP4	TRAM2	DDX31				C7
KCNIP4	DOCK1	DIP2C	DDX39A				FBLN5
BAI2	CROT	TNC	DDX47				IGF1
RP11-486G15.2	MTF2	ADAMTS9	DEK				CCL14 /// CCL15-CCL14
RP11-127B20.2	ITGAE	TSPYL2	EXO5				REEP1
PRKAG2-AS1	TRAPPC12	GNLY	DENR				LEPREL1
LOC101927268 /// LOC102724851	ZBTB43	DLG5	DEPDC4				OAT
MIR29B2 /// MIR29C	SEC31A	COL6A2	DFFA				DCHS1
DACT2	CCT7	SYNE1	DHX35				FAM178A
SIK1	KRT6B	LGR5	DHX36				SOBP
LINC-PINT	KIAA0196	OLFML2B	DHX37				KLF5
RP4-614O4.12	GAR1	ESRP2 /// MIR6773	DKC1				TPM1
LOC100506691	IMP4	C20orf27	DLEU2L				FAM69A
FGF7 /// KGFLP1 /// KGFLP2	SNRPF	CDH3	DLEU2				PARVA
MLLT4-AS1	PPARGC1A	SPOCK1	DNAJC21				DES /// SUPT20H
LOC100506476	LDB1	EPM2AIP1	DNMT1				TCF4
SNORD116-17 /// SNORD116-19 /// SNORD116-20 /// SNORD116-21 /// SNORD116@	SNX7	NR3C1	DNMT3B				CDC42EP3
AMN1	GRM8	NR2F6	DNTTIP2				NTAN1
ID4	PPAN /// PPAN-P2RY11	CILP	DONSON				MXRA7
SLC25A21-AS1	HSPA12A	ST14	DPH2				THEM6
NAP1L2	TACO1	ZBTB38	DPH3P1				FOXJ2
LINC00865	FAM193B	MGRN1	DPM1				FILIP1L
EPHX2	ZNF611	IL11RA	DTYMK				ARHGEF5
WDR86	PGK1	HERC1	DUSP22				MYLK
BRE-AS1	NMB	ZYX	DUT				BACH2
STMN3	LOC100996747 /// LOC101929876 /// RPS26 /// RPS26P11	HOXA10	E2F2				TSPYL5
PKDCC	SAMHD1	DHRS3	EBNA1BP2				GDPD5
RNASE4	SPATA5L1	INPP1	EFR3B				THBS1
LOC100270804	AC009237.8 /// AK055967	FN1	EFTUD2				ARHGEF17
ZDHHC15	NPFF	ARHGEF40	EIF2B1				DPP6
DDIT4	ULK1	PDZD2	EIF2B3				HOXD11
F3	KIT	IFITM2	EIF2S1				FAM114A1
UBE2QL1	AURKAIP1	TRIB2	EIF2S2				TRPC1
USP51	GGCX	PALLD	EIF4H				PDE2A
AF520793	TCF7L2	COL1A1	ELAVL1				PPAP2A
LOC100507468	CSTB	ADRA2A	ELOVL7				FNBP1
AK054988 /// TPTE2P1 /// TPTE2P1	MRPL15	ADAM12	EPHA6				HSPB2
RP4-635E18.8	AHSA2	KRT23	ERAL1				STX12
DMRTC1 /// DMRTC1B	ADRBK2	MAMLD1	ESR1				TM7SF2
LYPLAL1	DUS1L	IL17RB	ESYT1				LOC100996693 /// SPEG
NTN5	GABARAPL1	MAGEL2	EXOSC10				CDH13
C19orf33	MSH5 /// MSH5-SAPCD1 /// SAPCD1	MINOS1-NBL1 /// NBL1	EXOSC2				KDELC1
LOC101929855 /// LOC102724851	BCL6	PTGDS	EXOSC3				KCNMA1
MIR6883 /// PER1	DHRS11	PRR15L	EXOSC6				OLFML3
TCEA3	UQCRFS1	RND3	FADS1				DENND2A
C1orf213	EMC8	IFI30 /// PIK3R2	FAF1				LGALS1
MICA	UBE2N	QPCT	FAF2				COL6A3
LOC100507577 /// LONP2 /// SIAH1	MDH2	NYNRIN	FAM102A				GNA14
EPOR /// RGL3	INPPL1	RPS6KA1	FAM105B				FBXO17
FBXL16	HSPE1	GALNT14	FAM111B				EFEMP1
HEY2	GNAI3	SMARCD3	FAM122B				LRRC32
ARGLU1	PRKDC	KIAA0754	FAM134C				MLPH
PGAP1	N6AMT1	TMOD1	FAM136A				ACTG2
ANKRD22	KIF2A	ROR1	FAM72A				BLNK
NAT6	NAB1	CAP2	FAM72B				COPZ2
CD200	VPS13D	GPR137B	FAM72D				IFFO1
EIF3J-AS1	DLAT	CENPT	FAM83E				PLA2G4C
LOC100272217	RELN	CTSV	FAM98B				FLNA
LOXL4	CDC34	CRYAB	FANCB				ALDH1A2 /// LOC101928635
RP11-285J16.1	PSMA3	LHFPL2	FANCD2				JAM2
ZNF213-AS1	PCDHB3	PER3	FANCE				LGMN
C9orf72	CYLD	PLXDC1	FANCG				ERBB2
LOC284630 /// TTC34	C5orf15	NEFM	FANCM				PTPRF
TPST2	DARS2	SALL2	FARSB				CRISPLD2
ZNF711	GUCY2F	MAGED2	FASTKD5				STARD13
TRIM52-AS1	ICT1	F11R	FBP1				GAB2
SLC1A1	RIPK2	CYP46A1	FBXO48				APOD
LOC100996412	EFCC1	TFAP2A	FBXO5				DCN
FGF14-AS2	SAP30BP	FXYD1	FEN1				MAGEH1
CTA-246H3.12	METTL13	CDH5	FHL2				OSR2
GGTA1P	TAGLN2	CLEC11A	FIGNL1				PHLPP2
EN2	HIGD1B	TXNDC15	FIGN				SV2A
LOC101928963	ZNF552	LARP6	FIP1L1				MST4
TRAF3IP2-AS1	RYR3	TULP3	FKBP4				TGFB3
SCARNA13 /// SNHG10	DOLPP1	ADRA2C	FN3KRP				PCP4
ARHGEF26-AS1	CDKN1A	IRS1	FNDC8				USP11
ZNF790-AS1	C6orf47	HK2	FTSJ2				ACP6
PPM1M	TRIM16	PRAME	FTSJ3				MAN1C1
AMDHD1	ATP8B2	FZD5	FUT1				TCEAL4
S100A11	TRAPPC2L	TP53BP1	FUT5				TAGLN
LOC100507557	RITA1	WDR61	FUT8				VSTM4
GRAMD1C	SDHC	COL4A2	GABPB1				MIR6778 /// SHMT1
LOC283861	GTF2IRD1	DDAH2	GANAB				SLC24A3
RP11-355B11.2	MPC2	DMTN	GDF1				VWA1
BC040901 /// CTC-241N9.1 /// LOC100996419	ITIH5	HTRA1	GEMIN4				GDPD3
LOC284454 /// MIR23A /// MIR24-2	SELP	NID2	GEMIN5				SFRP4
RP11-196G18.23	EXOC5	WDR7	GEN1				LOC728392
LOC283588	ANXA3	CAPRIN2	GFM1				INPP5A
CCDC110	SYN1	JMJD1C	GINS3				CYP1B1
RP11-1109F11.5	KCNE4	ZNF248	GLO1				LOC102724229 /// RASA4 /// RASA4B
INTS6-AS1	HSPA1A /// HSPA1B /// HSPA1L	C1orf54	GLRX5				TMPRSS4
MORF4L2-AS1	TENM1	PLXND1	GLT25D1				CCND1
TTYH2	FTH1P5	GIPC1	GMNN				FBLN1
TMEM170B	NEU1	TBC1D2B	GMPS				SNCAIP
DPY19L2P2	LINC01140	CAPG	GNB5				PKP3
RPS6KA5	FGF7	TSPAN4	GNL3				NAP1L3
ZNF502	SLC10A3	PLA2G7	GNPDA1				FXYD6
RNF157-AS1	HIST1H2BB	CHST15	GPN1				SMTN
LOC101927811	MAPK13	MECP2	GPN3				OLFM1
LOC153682	AHR	CRMP1	GPR146				EMILIN1
GLIDR /// LOC728903	PDE8A	SNX1	GPR173				PODXL2
PAN3-AS1	DNAJB5	PRSS12	GPR19				EXT2
PSMG3-AS1	RUSC2	GRHL2	GPRIN1				SOCS2
ENO1-AS1	NRIP2	PLEKHB1	GRAPL				NBL1
PIK3R3	REC8	RAB17	GRPEL2				ROCK2
BZRAP1	RBBP8	TCEA2	GSG2				C14orf132
MIRLET7D	MT1E	MNX1	GSTK1				TPST1
KPNA5	DIXDC1	LY75	GTF2E1				TMPRSS3
HECTD2	RAI14	APOC1	GTPBP8				DFNA5
ZFP36L2	SLCO2A1	CNTNAP1	H2AFV				DLC1
CHGB	URB1	TJP3	H2AFY				TMEM204
LOC102724156	PAK3	LOC101930075 /// NPIPA1 /// NPIPA2 /// NPIPA3 /// NPIPA5 /// NPIPA7 /// NPIPA8 /// PKD1P1	HAT1				ADAMTS5
BOK	SPRY1	COL4A1	HAUS1				EHD2
JUNB	ERP29	IFITM3	HAUS2				PEG3
LOC100286925	CAPN6	MAP7	HAUS6				NES
PXN-AS1	GLI2	FAT4	HDAC1				TRIB3
ZNF784	TINF2	AHDC1	HDAC2				SLC11A2
GTF2H2 /// GTF2H2B	FAM160B2	NPIPA1	HDAC3				CSDC2
ATOH8	THBS4	FGF18	HEXA				HTR2B
MYRIP	KIAA1644	NAA16	HIRA				LCN2
RP11-16N11.2	FCER1A	TSPAN15	HLTF				HEPH
SFTPD	MRPL42	SNED1	HMGB1				PTPRD
ARID4A	HEXIM1	LPAR1	HMGB2				KANK2
LOC202025	JAKMIP2	HCRP1	HMGB3				ACTA2
ZC2HC1A	NFE2L3	ACSL1	HMGN1				COL3A1
C21orf2	ZHX3	NISCH	HMGN2				GLT8D2
SCRN2	SYNC	ANK2	HNRNPA0				PPP2R3A
ZC3H12C	HDGFRP3	PRKAR2B	HNRNPA2B1				PDE8B
JAZF1	CCND2	KLF2	HNRNPD				CLIP3
FAM73A	ABLIM3	CRTC3	HNRNPH3				C1orf216
RP11-846E15.4	FBLN2	AKAP13	HNRNPL				C2orf43
LOC100130285	TET3	GCHFR	HNRNPM				CAND2
CLK4	TIMM23 /// TIMM23B	TMEM8B	HNRNPR				CDH11
ANKRD20A5P /// ANKRD20A5P	NPIPB15	PAGR1	HNRNPUL1				ITGB1BP1
BBS10	FAM120A	EHD3	HP1BP3				PROS1
LOC101928605 /// OR2A1-AS1 /// OR2A20P /// OR2A9P	DOCK3	MAF	HPDL				LDB2
PDCD4	SLC31A1	VEGFC	HSF2BP				ABCA8
LOC441242	TACC1	SIX1	HSP90AB1				OGN
CELF5	AK021933	SRPX2	HSPA4				CALHM2
LINC00959	KLF8	SORT1	HSPA9				DPYSL3
LOC440149	CTAGE15 /// CTAGE4 /// CTAGE8 /// CTAGE9	UGGT2	HTATSF1				MAOB
NUMA1	RAB23	SMPDL3A	ILDR1				MRC2
PCDH7	COL16A1	HOXB2	INCENP				HIPK2
SPSB3	CDHR1	MAPK8	ING2				CUX1
LINC00886	HOXD3 /// HOXD4 /// LOC401021	PTCH2	IPO5				STXBP1
AGO2	APOB	ENO2	IQGAP3				PHLDA2
ZNF674-AS1	THNSL2	LTBP2	IRAK1				CLEC2B
GATS	ZNF423	KCTD12	ISY1				FLRT2 /// LOC100506718
CIRBP	PPP6R3	RSBN1	ITM2B				ASPN
LINC00271	ARHGEF15	PAEP	ITPRIPL1				FBN1
LOC100289230	TBL1X	FGF1	ITSN1				MFAP4
FSTL3	KCNK1	UCP2	IWS1				DPT
TSC22D1	GATA3	FAM114A2	KATNA1				NR2F2
LOC101928068	KCND3	NRP1	KCMF1				NPR2
RNF180	FRY	WWC3	KCNK6				NXN
BTG2	RAD54L2	GOLGA2P7 /// LOC101929479 /// LOC642423 /// LOC727751 /// LOC80154	KDM1A				HOXD9
CTD-2528L19.6	TP53TG3 /// TP53TG3B /// TP53TG3C /// TP53TG3D	AKAP2 /// PALM2-AKAP2	KDM2B				PLSCR4
PITPNA-AS1	IL13RA1	PAX6	KHDRBS1				MAGED4 /// MAGED4B /// SNORA11D /// SNORA11E
MATN1-AS1	MCOLN1	VAX2	KHSRP				SRPX
COLCA2	ERG	NBEA	EMC1				ZBTB20
KRBOX1	BHLHE40	PLEKHG6	TTI1				CTSK
TUBE1	NT5M	THEMIS2	KIAA0922				MCAM
LOH12CR2	ABCA6	MED12	KIAA1324				ISLR
RP11-1191J2.5	PKIG	PSD3	KIF13B				RFTN1
KAT2B	CCL21	COL5A3	KIF20B				SPINT1
WDFY3-AS2	UBE2V1P9 /// UBE2V1P9	KCNN4	KIF22				ABCG2
ZNF439	RBM7	ILK	KIF4B				TNXA /// TNXB
FAM86A	PPME1	F2RL1	KNTC1				CTAGE4 /// CTAGE8 /// CTAGE9
KLHL23 /// PHOSPHO2 /// PHOSPHO2-KLHL23	C10orf10	LINC00341 /// SYNE3	KPNA4
LOC102724689	ASB1	VDR	KPNB1
U2AF1L4	TPGS2	ATP2C2	KTI12
C16orf52 /// LOC101930115 /// VWA3A	CTNNA1	SMPDL3B	L2HGDH
SHPRH	APBB1	MBOAT2	CERS1
EVC2	NACC2	RECK	LDHB
RP11-513M16.7	SMPD2	BDKRB2	LENG9
LINC00938	RABGAP1L	KDR	LETM1
KLF16	TIMP2	LEPRE1	LIN54
LOC100507316	LEPREL2	BMP1	LLPH
ASAP3	PKP4	FOXG1	TMPO-AS1
CTD-2366F13.2	ACSS3	CHST12	RAMP2-AS1
ZNF658	ITGA8	CYBA	LOC341056
MICA /// MICB	PRKG1	KRT8	LOC344967
IPO11 /// LRRC70	PECAM1	DZIP1	LOC401010
RADIL	KLF9	ALDH3A1	LOC401127
IKZF5	GJC1	PKD2	LOC442308
TSPAN31	AOC3	KCTD7 /// RABGEF1	LOC442459
LOC728705 /// TMEM263	CCDC6	CACNA1D	LOC641367
SDR39U1	LOC100507472 /// PCSK6	CAMK1	LINC00669
LOC644656	PDLIM4	MSX2	ANP32AP1
CCDC148	GUSBP3 /// GUSBP9	RBFOX2	LOC728554
SPATA20	SLC13A4	BC069804 /// SMAD1	OIP5-AS1
LOC100131564	ACKR1	TNFSF12-TNFSF13 /// TNFSF13	LOC730101
RPL10L	KANK3	KLF11	LOC90246
KIAA1107	NRXN2	IER2	LPCAT3
SF1	RUNDC3B	GRB7	LRG1
RFNG	MTA1	BSPRY	LRP8
FAM175A	SPA17	LPAR3	LRPPRC
POLI	KANK1	MVD	LRRC3
ETV5	HSPB7	SLC2A8	LRRC42
DICER1-AS1	TNFRSF10B	DACT1	LRRCC1
ATP1A1-AS1	DNAJC13	U2SURP	LSM11
SRSF6	AGR2	REV3L	LSM14A
ZNF25	KCNB1	NUDT4 /// NUDT4P1	LSM2
LOC100506472 /// TAB1	MBNL1	ZNF324	LSM3
RP11-318A15.2	TSPAN5	STEAP3	LSM5
ZNF677	LRRC16A	CHST7	LSM6
C10orf25	LAT	NQO1	LSS
NME3	TRPC6	SYT11	LTV1
PMM1	TECR	CDK18	LYAR
LOC100506713	NUDT21	RPRM	MAD2L1BP
ADAM1A /// ADAM1A	SLC22A3	CTC-428G20.3	MAPKAPK5
KCNC4	ACTC1	FZD4	MAPRE1
SENP6	GJA4	DYNC2H1	MARS2
CTB-31O20.2	ADNP2	AQP5	SLC25A53
TRIM45	ALDH3A2	WIPF1	MCM7
TMEM27	ZNF26	MAN1A1	MCM8
SPX	VAV3	TRIM25	MDC1
RP11-5C23.1	DGKD	COL14A1	MED10
LINC00909	FLNC	HOXB3	MED6
PAXIP1-AS1	SEC23IP	CSNK2A2	MEN1
C8orf82	CTIF	PRAF2	METTL6
C7orf31	MALT1	TMPRSS2	METTL8
COBL	GALNT6	SCGB1A1	MFSD2B
FGFBP3	DES	CNN2	MGLL
RP11-1275H24.2	LRRC8B	TUBG2	MKI67IP
LINC01023	TAL1	SMARCC2	MLF1IP
MUTYH	GSR	CNTLN	MMACHC
CCNJ	TIMP3	LOC101930112 /// SPG7	MND1
SNHG19	SYNPO	PAN2	MOCS3
CHD4	UST	RAB20	MPP6
FAM188A	ADIPOR1	MAPKAPK3	MRPL37
LOC100147773	PDLIM3	ECEL1	MRPL3
ANXA2P2	ABCC4	MTR	MRPL46
P2RY1	TMEM14B	SPAG4	MRPS18B
PLA2G6	TNS1	LOC100996792 /// MAP2K3	MRPS18C
LOC257396	PRDM2	MIR22 /// MIR22HG	MRPS22
TMEM220	SAP130	HN1	MRPS23
ZNF626	CLDND1	ANKRD28	MRPS30
PRPF40B	MMP19	MPHOSPH10	MRPS6
S100A11P1 /// S100A11P1	LTBR	AP1M2	MRPS7
LINC00115	TMEM47	FAM117A	MRS2
ZNF253	HOXB13	TERF2	MSH2
CEACAM21	CACNA2D2	RHBDF1	MSH6
SIDT2	SUSD5	GDF15	MTA2
CTD-2292M16.8	MT1M	TBC1D12	MTAP
KLHDC2	GPR21	PMEPA1	MTHFD1L
FRG1 /// FRG1B /// LOC100134091 /// LOC100289097 /// LOC101930278 /// LOC101930531 /// LOC102724923	BACE1	EML1	MTRF1L
YPEL3	TCEAL2	PALM	BLOC1S5
TBC1D32	CACNB2	TTC28	MYBBP1A
LOC100129098	PEX26	IL15	MYBL1
GLIDR	JUP	HGSNAT	MYNN
RP11-819C21.1	SMC6	PEG3 /// ZIM2	NAA15
HACE1	MACF1	HOOK2	NAA50
TMEM245	DNAAF1	CD34	NAE1
WDR37	NUS1 /// NUS1P3	DUSP8 /// LOC101927562	NAGLU
CTD-3025N20.3	HAND2	LOC399491	NANP
SALL1	LOC202181	STAG1	NARS2
TNNI3K	ITGB1BP2	VAMP2	NASP
LCA5	IREB2	BCHE	NAT10
LOC100506469	TMEM33	PGR	NAT8L
LOC100287525	CA2	DDR1 /// MIR4640	NCAPD3
ZFP92	KIAA1598	CPE	NCL
RAB33B	NCSTN	PPM1F	NDRG2
ID2	MAGOHB	BCL3 /// MIR8085	NDRG3
SFXN2	PDE1A	SUPT7L	NDUFAF4
IGDCC3	APBA3	PARP6	NDUFB6
AK023627 /// TCTE3	SCRG1	TMEM246	TONSL
POLR3H	CRY2	NAALADL1	NGDN
PDCD4-AS1	MCAT	FAM50B	NGFRAP1
DNAJC27-AS1	XIST	C19orf66	NIF3L1
LOC101928403	NOTCH4	IP6K2	NIP7
GNG7	CT55	NRG2	NLRX1
TOLLIP-AS1	UBL5	ELOVL4	NMU
DPH1 /// OVCA2	TBXAS1	CACNA1H	NOL10
SEC62	ZDHHC11 /// ZDHHC11B	HOXB5	NOL11
ANKRA2	APBB3 /// MIR6831	VPS13B	NOL6
C15orf56	EFCAB14	TPSAB1	NOM1
RARA-AS1	ZNF862	PELI2	NONO
ARHGEF28	MRPS33	GPX1	NOP14
RAB35	USH1C	INHA	NOP56
ZDHHC2	B4GALT6	C1orf123	NOX5
RP11-73K9.2	CSRP1	CTSH	NR6A1
RASGRF2	TMEM100	DUSP1	NSUN2
HAL	OSBPL11	EPN3	NUDT19
CGNL1 /// LOC101930344 /// LOC101930349	AIM1	GIMAP6	NUFIP1
ZNF559	HMGA2	SLC39A4	NUP107
CRNDE	SNW1	MED13	NUP160
MBIP	SRSF4	CIDEB	NUP188
LOC101929072 /// LOC285835	TRIM9	APOBEC3C	NUP210
ZNF45	PRKCD	CDK2AP2	NUP35
SPICE1	PAFAH1B3	CC2D1A	NUP43
SOX4	LYVE1	KRT18	NUP50
MIR6516 /// SCARNA16 /// SNHG20	MREG	CARD10	NUP62
ST7-AS1	GPN2	CTPS2	NUP85
BTC	SLC4A3	GPRC5C	OBFC1
DFFB	ANXA8 /// ANXA8L1	QSOX1	OLA1
COX10-AS1	EVA1B	PSD4	ORC3
RNF139-AS1	SHH	METTL22	ORC5
C14orf28	RPE	DIO2	OXNAD1
LOC101927609	SEMA4A	AR	OXSR1
KCNN2	CRTAP	PKNOX2	P2RX4
METTL3	TENM4	DPP3	PALB2
ZNF485	BCAR3	STC2	PANK2
TLCD1	ST3GAL2	FCGR1B	PAPD7
CCSER1	CIT /// MIR1178	TMC6	PAPSS1
MIB2	SNX2	SCD	PARP2
ZNF550	ZFPM2	PRKCQ	PARS2
ANKRD49	PAPPA	RGS5	PATL1
PLCD1	EMCN	POSTN	PAXIP1
BBS4	ME2	PGPEP1	PCID2
FDXACB1	PAK1	LINC00597	PCMT1
THAP2	CASKIN2	ATP1B2	PCNT
ZC3H12B	IK /// TMCO6	ERBB3	PDCD10
RP11-554J4.1	ZC4H2	DENND2D	PDCD11
LOC101928545	OSTF1	ZNF189	PDCD2
UBASH3B	GREM2	CCNL2	PDCD7
GUSBP5	C11orf21	EXOC3	PDXP
ZNF548	ZNF354A	PPFIA4	PES1
MAPK1	TLN2	SHC1	PEX5
CLN5	SPECC1L	TLN1	PFAS
PAIP2B	MMP28	NADK	PGAM5
TRMT13	SPCS1	GSTM5	PGBD1
KCNMB2	NXF1	ZNF37BP	PHF10
EXOSC8	HEATR2	BAG2	PHF13
LOC100506325	AGTR1	MICAL3	PHF19
ZSCAN30	TDO2	MIR6787 /// SLC16A3	PHF5A
MAN2B1	MRPL23	ADAMTS1	PHGDH
DOCK9-AS2	ITGA7	LOC157562	PHLDA3
SP4	ATP5A1	TUBB4B	PHRF1
VPS36	ERO1L	CTSW	PHTF2
KB-431C1.4	TOM1L1	RBM38	PHYHD1
GPALPP1	ARHGEF10	EPOR	PITPNA
LOC102724275	SERPING1	IL15RA	PITPNB
ZNF273	GALE	SFRP1	PLAA
CACHD1	KCNAB1	SMAGP	PLCXD1
LOC101928725	HSD17B6	HOXB7	PLEKHA8
RP1-286D6.5	TMED5	FKBP5	PLEKHM1
ACD	PGLYRP1	GBP2	PLK4
RP11-468E2.5	IFI16	TMEM30B	PLLP
UQCC1	MYH11	CD97	POLA1
CTA-29F11.1	SART1	PON3	POLA2
NUDT12	UBE2J1	LZTR1	POLD2
KANSL1L	NDRG1	LCAT	POLE3
APH1B	BEX4	EPHX1	POLE
EPB41L4A-AS2	EPS8L3	IRF8	POLH
LOC101929112	CAPN3	B3GNT1	POLR1B
ZNF564	C19orf54	SETX	POLR2D
PTGR2	TUBB2A	DNASE2	POLR3B
ITFG2 /// LOC100507424	LDB3	GREM1	POLR3E
SMYD5	C22orf31	HERC5	POLR3G
CXXC4	GOLGA2P5	HOMER2	POP1
ETAA1	PSENEN	SLC2A6	PPAP2C
MAT2A	SLC27A2	CBR4	PPAT
MBLAC2	ARHGAP6	SLC37A1	PPIL1
KANSL1-AS1	TACR2	P4HB	PPP1R8
SENP7	S1PR1	FGFR1	PPP2R5D
LETMD1	POPDC2	HOXB6	PPP5C
RBM4	MT1X	RAMP2	PPRC1
EXD2	PIGF	ZNF337	PPT1
ZEB1-AS1	RBFA	RRAS	PPT2
FLT1	VGLL3	PITPNM1	PRELID2
DTWD1	RNF125	ICAM2	PRIM2
NDST2	STX18	PITPNC1	PRKAB1
LOC100506302	SH2B1	DSE	PRMT5
NUDT6	SMYD2	PRKD3	PRMT6
LOC100996756	CHRD	FARSA	PRPF38A
RP11-517B11.7	DSTNP2	RAP1GAP	PRPS1
ZNF853	ENPP1	PRRX1	PRR11
LOC101928806	RNPEP	LOC101930075 /// LOC102724993 /// NPIPA1 /// NPIPA2 /// NPIPA3 /// NPIPA5 /// NPIPA7 /// NPIPA8 /// PKD1P1	PSIP1
ZFP37	TSPAN2	PPP1R12A	PSMA2
COX11	MT1H	PHC2	PSMA6
BTBD6	RTCA	MEF2A	PSMA7
ACYP1	NFYA	CLIC2	PSMB2
FLJ23867 /// QSOX1	SLC1A3	DNAJC22	PSMC2
CREBZF	NBEAL2	MAGI2	PSMC3IP
RP11-499E18.1	VPS8	LONRF1	PSMD11
FKTN	WASF2	IQCJ-SCHIP1 /// SCHIP1	PSMD12
HCFC2	SLC8A2	HYMAI	PSMD14
TTC31	KBTBD2	C11orf24	PSMD1
LINC01315	FEZ1	PDIA4	PSMD6
DPP7	KLF10	NUAK1	PSRC1
ERBB2IP	FAM110B	PPAP2B	PTBP1
ZNF33B	PALMD	WWC1	PUS7
RAI2	MAP4	CCBL1	PWP1
PPIP5K2	IRAK3	YIF1A	PWP2
TOB1	BMI1 /// COMMD3-BMI1	CNPPD1	PXMP2
RPLP0P1 /// RPLP0P1	ARID3B	STX6	RAB22A
CDK6	C7orf63	ETHE1	RAB32
C2orf68	TCEAL1	GCNT1	RAB39B
SARM1	LIME1 /// ZGPAT	ARHGAP17	RACGAP1P
TIAL1	OR7E47P	BST1	RAD18
LINC00869	CYB5R4	ALDH1A2	RAD1
TRAM2-AS1	KPNA1	LOC100996668 /// ZEB1	RAD51C
PEX1	ATRNL1	NDRG4	RAD54B
GAS7	FABP3	SYNDIG1	RAD9B
SEC22A	AMPD2	TRIP6	RAE1
SERTAD4-AS1	SERINC1	SRF	RALA
ZC3H6	PTPRN2	MDFIC	RANBP1
THUMPD1	FOXN3	DCAF11	RANGAP1
HTR7P1	CHKB-CPT1B /// CPT1B	RAP2C	RARA
RPL10 /// SNORA70	ARMCX4	OGFOD1	RASL10B
RP11-422P24.11	NPTN	STXBP6	RBL1
LIAS	SPCS2	ATN1	RBM14
EXT1	HDHD1	CRYZL1	RBM15
LOC100129550	HYI	IGSF3	RBM22
ADCK3	CHRM3	SLC25A13	RBM28
METTL10	PQLC1	KIAA1462	RBMXL1
SNHG11 /// SNORA60 /// SNORA71E	CLEC1A	LRRC61	RBMX
ZNF14	PPP1R3C	ELN	RBPMS
TTC32	KCTD2	FASN	RCC1
KIAA1328	TTC39A	GMDS	RCE1
RPP25	MS4A2	CORO1B	RCL1
FAM86B1 /// FAM86B2 /// FAM86C1 /// FAM86DP /// FAM86FP	FADS2	PRKACB	RDM1
IFT20	POLR2F	DPYD	REEP4
DDIT3	VCP	MPP1	RELT
MICALL1	PROCR	PARM1	RFC1
SPIN2A /// SPIN2B	ADRB2	CADM1	RFC2
PTPN11	PPP1R12B	PPIEL	RFC5
ERAP1	AKIP1 /// NUAK2	FLOT2	RFT1
DNAJC27	TBCEL	LOC102725198 /// RASA4 /// RASA4B /// RASA4CP	TRMT10C
TMCO6	UROD	SYT17	RGS3
PRIMPOL	HMBOX1	LOC155060	RIOK1
DXO	ATP2B4	FAM172A	RNASEH1
CDCA7	NOVA1	GRK5	DROSHA
PIGV	ENDOU	STXBP2	RNASET2
ADCY7	PRELP	ZNF580	RNF135
GLTP	CSPG4	NEK9	RNF219
GATAD1	CAPRIN1	ALDH3B2	RNF26
RBL2	APITD1 /// APITD1-CORT	ENG	RNF5P1
ZBTB26	GDPD2	ABHD14A-ACY1 /// ACY1	RNF5
UBA1	UBFD1	CDK14	RPA1
STX16	ZNF385D	CHKA	RPA2
DMTF1	STX2	NPY1R	RPA3
SETD6	ARSF	NEDD4	RPF1
MIR6824 /// SLC26A6	EPHA1	RNF43	RPL7L1
OGG1	CHRDL1	PIM1	RPP14
LNP1	ACTB	PNMA2	RRM1
LOC102606465	GPR153	GALNT3	RRP1B
ZNF599	NUP62CL	MPHOSPH6	RSRC1
RPL31	GNRH1	MCF2L	RTKN2
ZNF691	SMAD2	EPB41L3	RTN3
CCDC121	RBBP7	NFIL3	RTN4R
RBM43	RBKS	FYN	RTTN
ZNF226	RAB5A	HCK	SAAL1
ACADSB	MYH9	THSD7A	SAE1
ZNF140	SORBS1	PTPN13	SAP30
TOR1A	SLC18A2	WBSCR22	SART3
LOC101929787	SNCA	NINJ2	SASS6
RPARP-AS1	RNF44	SVEP1	SBNO2
C15orf40	FHL1	ITGB5	SC5DL
MATR3 /// SNHG4	ARID5B	FGD1	SCML2
SAT2	FOXJ1	FRZB	SCNN1G
METTL25	AP5S1	AP2S1	SEC61A2
CGRRF1	BC069004	PIEZO1	SEH1L
NDUFV2-AS1	ADM	POLR1E	SENP1
LOC100506548 /// RPL37	CGREF1	WSB1	SENP3
KIAA1429	YBX3	PTPN6	SEPHS1
BGLAP /// PMF1 /// PMF1-BGLAP	IL33	ITM2A	SERBP1
MAP3K2	RAD50	TRPM4	SERINC2
C22orf29 /// GNB1L	DPP4	SLC35D1	SERPINA1
LNX1	CX3CR1	MMP14	SETD8
IER5	FAM20B	SEMA4C	SET
ZNF415	REXO2	CIB1	SF3A3
PPP1R14B	STK38L	ENPP4	SF3B14
NOTCH3	GFPT2	CSGALNACT1	SF3B2
RP11-389C8.3	TSPAN6	RP11-680C21.1	SFMBT1
CWF19L2	IL6	SMG9	SFPQ
MTERF4	PGF	PLSCR3 /// TMEM256-PLSCR3	SRSF12
PEX11A	HYAL1	DLG3	SCAF4
KIAA0100	SDC1	DOK5	SRSF1
CUTC	FAM65B	MAP4K5	SRSF8
NNT-AS1	FADD	RPL18AP16 /// RPL18AP16	SRSF2
SNORD3A /// SNORD3B-1 /// SNORD3B-2 /// SNORD3C /// SNORD3D	VDAC3	PKM	SRSF3
RBM26-AS1	HSP90B1	HTR1E	SRSF9
TMEM42	ITM2C	DMPK	SFXN3
ICE2	C12orf49	EGR2	ARHGEF26
OSGEPL1	ATP5S	RAB11FIP2	SH2D5
RP11-532F12.5	MKL2	C1QTNF1	SIDT1
TSPY26P	MEOX2	PAQR4	GEMIN2
YAE1D1	TOP1	GCOM1 /// POLR2M	SKAP1
LEPREL4	CAV2	MMRN1	SLBP
LOC100287015	ENOX1	SH3BP5	SLC15A2
SNORD50A /// SNORD50B	GUCY1A2	PRR7	SLC25A3
LOC283788	MIR4745 /// PTBP1	AF070581	SLC27A1
USP3	GMPR2	NTRK3	SLC29A1
LOC101930048 /// LOC101930053 /// VLDLR-AS1	HSPB3	SH2B3	SLC36A4
AQR	ITGA9	GPX4	SLC44A3
ZNF791	ALDH1A1	FBXL6	SLC46A3
METTL1	KCNK5	TRABD	SLC4A1AP
ZFAND3	SLC9A3R1	ARHGEF6	SLC4A5
LYSMD3	LINC00623 /// LINC00869	IRF6	SLC5A1
RPP30	EFNA3	PLXNB1	SLMO1
PARP16	RHBDD3	ZNF587B	SMARCD1
RPS28	GSK3B	TBC1D8	SMC1A
MDP1 /// NEDD8-MDP1	PI4KA		SMCR7L
PARP8	PLGRKT		SMPD4
CTNND1 /// TMX2-CTNND1	NLRP2		SMU1
RHOT2	PRKCDBP		SNORA40
EXTL2	MFAP5		SNRNP40
DCUN1D4	ACADL		SNRNP48
NOL8	ANXA4		SNX33
LOC439994 /// LOC642361	EGOT		SNX5
CSRNP1	PDP1		SPACA4
ANKRD17	MEOX1		SPATA5
COA5	PHYHIP		SPRYD3
ZNF776	GNAZ		SRD5A1
MLEC	RNASE1		SRD5A3
ZFAND2B	NOD1		SRRM1
FAM35A	PTGIS		SRRT
RAB28	PARP4		SSB
XPC	ANXA5		STARD7
GLT8D1	LARP4B		STAT6
TRMT10A	COL21A1		STIP1
RP1-39G22.7	PEG10		STOML2
PPP1R35	TRPM2		STRAP
DDB2	ADD1		SUMF1
C1orf52	ABL1		SUMF2
MPHOSPH8	ACE2		SUMO2
DYNC2LI1	LINC00312		SUMO3
C1orf174	VNN3		SUPT16H
LMAN2L	RAB11FIP1		SUPV3L1
NSMCE4A	FOXF1		SUV39H2
ZNF594	EDC4		SYNCRIP
ELF2	VAT1		TADA2A
PGAP3	GATA6		TADA2B
THAP6	NBN		TAF11
R3HDM1	MYH3		TAF4B
DNAJC30	NUDT4		TAF4
LOC100289098	LIG4		TAF5
ARL14EP	KCNMB1		TAF8
FCHO2	GLRX3		TARDBP
WDR48	MEPE		TARS
BEND5	EAF2		TBCCD1
MED17	RCAN3		TBPL1
EPC1	NLGN1		TCOF1
ZBED5	TUFT1		TCP1
DNAJC3-AS1	SCN3B		TEAD4
COQ10A	COLEC12		TEX10
GLRB	ASPH		TFDP1
CREBBP	TRPM3		TFG
EIF2D	MT2A		TFRC
PPM1A	RASGRP2		TGIF2
ZNF222	SH3BGRL		THOC3
EXOC1	LHX6		THOC5
ALKBH8	MCAM /// MIR6756		TIGD3
RP9 /// RP9P	MMP1		TIMM8A
PIGL	CLDN5		TIPIN
MUT	MNS1		TK2
LOC101929243	TMEM41B		TMC4
AK130486	HTATIP2		TMED3
BAZ2B	GSTP1		TMEFF1
MORC3	LPHN1		TMEM101
C12orf73	COQ9		TMEM185B
ZNF608	LAMB2		TMEM194A
SURF1	PLP1		TMEM194B
ANXA2P3	RIMS3		TMEM199
ARHGAP5	FERMT2		TMEM214
ZNF347	MYOZ2		TMEM229B
NPRL2	PTPRB		TMEM48
LOC101929147	FEZ2		TMSB15B
DNAJA2	AQP1		TNFRSF10C
SWSAP1	RFX5		TOM1
RNASEH2B	FAM46C		TOMM70A
FUBP1	NAA40		TOP3A
ADPRM	MAPRE2		TOPBP1
VPS37C	YWHAH		TRA2B
SACM1L	IL27RA		TRIM59
STRADB	PEF1		TRIT1
APTR	P4HTM		TRMT5
EIF5A	VEGFA		TRMT6
PPP2R2A	PRRG2		TSKU
JADE1	PYGM		TSN
RC3H2	GPR56		TSPAN9
PPIL3	LMCD1		TTC27
LMNA	GALNT12		TTC4
USP30	PLK3		TTC9C
PIGH	TIMP4		TTF2
ZNF623	SLC35F2		TTL
RP9P	BRCC3		TUBA1A
NUTF2 /// NUTF2P4	NFASC		TUBA1B
RAD51L3-RFFL /// RFFL	STC1		TUBA1C
MTX3	PCSK7		TUBB
RAF1	SYK		TUBD1
ZAK	ATP6V1A		TUBGCP3
NICN1	NQO2		UBA2
LIPT1	CBFA2T3		UBE2R2
ZNF329	GDF5		UBR7
ZNF148	TGFA		UBXN2A
MYO9A	KIAA1731		UMPS
TIMM9			UNG
SLC35B3			USP1
ZNF555			USP37
CTDNEP1			USP39
MROH7-TTC4 /// TTC4			USP5
PIAS1			UTP18
AKAP11			UTP3
DUSP28			VPS33A
PLBD2			VTA1
DKFZP434I0714 /// MIR4453			WBP11P1
ZRANB2			WBP11
RP11-483I13.5			WDR12
DIDO1			WDR33
SMURF2			WDR3
USP45			WDR43
SRP19			WDR4
OXLD1			WDR5
GUSB			WDR62
OSBPL9			WDR67
SLC35A1			WDR70
PDE12			WDR76
LOC101927974			WNK3
MTF1			WTAP
AZI2			XG
ZKSCAN4			XPO1
MOSPD3			XPO5
SRSF10			XRCC2
WDR5B			XRCC3
DDI2 /// RSC1A1			XRCC5
TMEM25			XRCC6
CAMLG			XYLB
ZNF680			YBX1
ZBTB11			YRDC
FASTKD2			YWHAQ
DCP1B			YY1
SNHG1 /// SNORD22 /// SNORD25 /// SNORD26 /// SNORD27 /// SNORD28 /// SNORD29 /// SNORD30 /// SNORD31			ZBTB24
TBC1D22A			ZBTB2
DENND6A			ZBTB39
MOB3B			ZBTB7A
AURKAPS1 /// RAB3GAP2			ZBTB8B
TBC1D15			ZBTB9
TMEM161A			ZC3H15
C7orf55-LUC7L2 /// LUC7L2			ZC3H18
FAM200B			ZC3H8
PLS1			ZFYVE21
ASCC1			ZNF207
VAMP8			ZNF256
			ZNF259
			ZNF410
			ZNF473
			ZNF492
			ZNF519
			ZNF530
			ZNF620
			ZNF625
			ZNF681
			ZNF695
			ZNF714
			ZNF718
			ZNF788
			CHAMP1
			ZNF85
			ZNF878
			ZNF98
			ZW10
			ZYG11A
			AARS2
			ABCA17P
			ABCG4
			ABHD5
			ACOT8
			ACVR1B
			ADCK4
			AIF1L
			AKT1S1
			AKT2
			ALDH16A1
			ALG3
			ALKBH6
			ARFGAP3
			ARHGEF38
			ARL6IP5
			ATP5SL
			ATP6V1G2
			B4GALNT4
			BCAM
			BCAT2
			BCL2L12
			BLOC1S3
			BRAP
			C15ORF27
			FAM211A
			C17ORF96
			C19ORF33
			C19ORF47
			SH3D21
			SOGA1
			NCOR1P1
			C2ORF48
			C2ORF68
			C6ORF132
			C7ORF13
			C7ORF61
			C9ORF152
			C9ORF170
			C9ORF66
			CADM4
			CADPS2
			CEP89
			CCDC42
			CCDC8
			CCDC97
			CD44
			CDC42SE2
			CDKN1C
			CEBPB
			CHTF18
			CLCF1
			CLEC18A
			CLEC18B
			CLPTM1
			CNOT3
			COX6B1
			CPNE1
			CPVL
			CRIP3
			CTAGE5
			CTU1
			CUL7
			CUZD1
			DBP
			DEDD2
			DEGS1
			DHX34
			DMWD
			DSCR9
			DYRK1B
			EBF4
			ECH1
			EEF1DP3
			EGLN2
			EID2B
			EID2
			EIF3K
			EPN1
			EPS8L1
			EXOSC5
			FADS3
			FAM124A
			FAM131C
			FAM171A2
			FAM180B
			FAM24B
			FAM71E1
			FBL
			FBXO27
			FBXO46
			FIZ1
			FKBP1B
			FKRP
			BAIAP2-AS1
			FNDC5
			FOXP4
			GABRE
			GALT
			GDAP1L1
			GEMIN7
			GFOD1
			GMEB2
			GNB3
			GNG3
			GPATCH1
			GPD1L
			GPR62
			GRAMD1A
			GRID2IP
			GRWD1
			GSK3A
			GTF2H4
			HAUS5
			HDAC7
			HEPACAM
			HIPK4
			HOXA3
			HRNR
			HSD17B14
			HSD17B4
			IL4I1
			IRF2BP1
			IRF3
			ITFG2
			ITPKC
			KCNA7
			KCNIP3
			KCP
			KCTD17
			KHDC1
			KIF7
			KLC3
			KLC4
			LEMD2
			LIPE
			LOC100009676
			LOC151174
			TOB2P1
			LOC440173
			SCGB1B2P
			LINC00839
			LRRN2
			LY6K
			LYPD6B
			MAEA
			MAMSTR
			MANSC1
			MAP1LC3B
			MAP3K10
			MARK4
			MBOAT7
			MCPH1
			MED25
			MED29
			MED8
			MFSD6L
			MLL4
			MLX
			MORC2
			MPV17L
			MRPS12
			MYO15A
			NAB2
			LINC00085
			NELF
			NFKBIB
			NFKBID
			NFS1
			NFYC
			NHLRC1
			OPRL1
			OR13A1
			PAF1
			PAK4
			PANK4
			PBX2
			PDCD5
			PDE6B
			PDRG1
			PDXK
			PHLDB1
			PISD
			PLCB4
			PLCD3
			PLD3
			PLEKHG2
			PLEKHG4
			PLEKHM2
			PNMAL2
			PNPLA2
			POC1B
			POLDIP2
			PPP1R12C
			PPP2R1A
			PRKD2
			PROCA1
			PRPF31
			PRR12
			PRR19
			PSMC4
			PSTK
			PTOV1
			PTP4A3
			PTPN3
			PVRL2
			RASGEF1C
			RDH13
			RNASE10
			RNF112
			RNF126P1
			RPS16
			RTN2
			RXRB
			SCAF1
			SDHAF1
			SEMA6C
			SERPINF2
			SGCB
			SGSM1
			SH2D4B
			SH3GLB1
			SHKBP1
			SIRT5
			SIX5
			SKIV2L
			SLC12A5
			SLC17A9
			SLC25A23
			SLC48A1
			SLC5A11
			SMTNL2
			SNRPC
			SNRPD2
			SNTA1
			SOX12
			SPATA2
			SUCLG2
			SUPT5H
			SUV420H2
			SYMPK
			TBC1D17
			TBCB
			TCF15
			TEAD2
			TFAP4
			THAP8
			THBS3
			TMCC2
			TMEM144
			TMEM147
			TMEM9B
			TMIE
			TOMM40
			TRIM28
			TRIM46
			TSEN34
			TULP1
			U2AF2
			UCKL1
			UNC119
			UNC13D
			UPK3BL
			USF2
			VASN
			VPS52
			VSIG10L
			WDR46
			WIPF3
			WRNIP1
			WTIP
			XRCC1
			YIF1B
			YTHDF1
			ZBTB22
			ZCCHC3
			ZFP82
			ZNF343
			ZNF346
			ZNF362
			ZNF192P1
			ZNF503
			ZNF507
			ZNF526
			ZNF544
			ZNF565
			ZNF574
			ZNF576
			ZNF579
			ZNF607
			ZNF613
			ZNF71
			ZNF787
			ZNF883
			ZNF90
			ABR
			ACAP2
			ACOXL
			ACTL6A
			ARHGAP23
			ASTE1
			ASTL
			ATP13A3
			BDH1
			BEND6
			HENMT1
			XXYLT1
			MB21D2
			C6ORF106
			CABLES2
			CCDC155
			CCDC50
			CDR2L
			CLCN2
			CLDN1
			DCUN1D1
			DLG1
			DNAJB11
			DNAJC19
			ECE2
			EIF4A2
			EIF4G1
			ESYT3
			FAM131A
			FAM184A
			FBXO45
			FXR1
			FYTTD1
			GLS
			GNGT1
			GPR20
			HHEX
			HRASLS
			IGF2BP2
			KCNG3
			KCNMB3
			KCTD1
			KIAA0226
			TP73-AS1
			LOC152217
			LOC220729
			SMIM13
			LOC729603
			LPIN2
			LRCH3
			LRRC33
			LSG1
			MAGEF1
			MAP6D1
			MCCC1
			MFI2
			MFN1
			MGC2889
			MRPL47
			MYCL1
			NCBP2
			NDUFB5
			NRIP3
			NUAK2
			OPA1
			PAK2
			PAQR5
			PCYT1A
			PIGX
			PIK3CA
			PPP1R2P3
			PPP1R2
			PSMD2
			RNF168
			SDHAP1
			SDHAP2
			SEMA6D
			SENP2
			SENP5
			SLCO3A1
			STON2
			TBL1XR1
			TFDP2
			THRB
			TMEM41A
			TNK2
			TRPV3
			UBXN7
			WASF1
			WDR53
			WIPI2
			YEATS2
			ZBTB10
			ZNF257
			ZNF639
			ZNF772
